# Supplementary material for: Trauma airway management in emergency departments: a multicentre, prospective, observational study in Japan
Source: PubMed Central journal article supplement — BMJ Open. 2015 Feb 4;5(2):e006623. doi: 10.1136/bmjopen-2014-006623 (PMC4322207; doi:10.1136/bmjopen-2014-006623), 2015-02-04
Supplement: bmjopen-2014-006623.draft_revisions.pdf [file bmjopen-2014-006623.draft_revisions.pdf]

# BMJ Open

## Trauma airway management in emergency departments: A multicenter, prospective, observational study in Japan

|                                 |                                                                                                                                                                                                                                                                                                                                                                                                                                                     |
|---------------------------------|-----------------------------------------------------------------------------------------------------------------------------------------------------------------------------------------------------------------------------------------------------------------------------------------------------------------------------------------------------------------------------------------------------------------------------------------------------|
| Journal:                        | <i>BMJ Open</i>                                                                                                                                                                                                                                                                                                                                                                                                                                     |
| Manuscript ID:                  | bmjopen-2014-006623                                                                                                                                                                                                                                                                                                                                                                                                                                 |
| Article Type:                   | Research                                                                                                                                                                                                                                                                                                                                                                                                                                            |
| Date Submitted by the Author:   | 18-Sep-2014                                                                                                                                                                                                                                                                                                                                                                                                                                         |
| Complete List of Authors:       | Nakao, Shunichiro; University of Ottawa / The Ottawa Hospital - Civic Campus, Department of Emergency Medicine<br>Kimura, Akio; National Center for Global Health and Medicine, Department of Emergency Medicine and Critical Care<br>Hagiwara, Yusuke; Tokyo Metropolitan Children's Medical Center, Department of Emergency Medicine<br>Hasegawa, Kohei; Massachusetts General Hospital, Harvard Medical School, Department of Emergency Medicine |
| <b>Primary Subject Heading</b>: | Emergency medicine                                                                                                                                                                                                                                                                                                                                                                                                                                  |
| Secondary Subject Heading:      | Medical management                                                                                                                                                                                                                                                                                                                                                                                                                                  |
| Keywords:                       | TRAUMA MANAGEMENT, ACCIDENT & EMERGENCY MEDICINE, MEDICAL EDUCATION & TRAINING                                                                                                                                                                                                                                                                                                                                                                      |
|                                 |                                                                                                                                                                                                                                                                                                                                                                                                                                                     |

SCHOLARONE™  
Manuscripts

1  
2  
3 **Trauma airway management in emergency departments: A multicenter, prospective,**  
4  
5 **observational study in Japan**  
6  
7  
8  
9

10 Shunichiro Nakao, MD<sup>1</sup>; Akio Kimura, MD, PhD<sup>1</sup>; Yusuke Hagiwara, MD, MPH<sup>2</sup>; and Kohei  
11 Hasegawa, MD, MPH<sup>3</sup>, on behalf of the Japanese Emergency Medicine Network Investigators  
12  
13  
14  
15

16  
17 <sup>1</sup>Department of Emergency Medicine and Critical Care, National Center for Global Health and  
18 Medicine, Shinjuku, Tokyo, Japan; <sup>2</sup>Department of Emergency Medicine, Tokyo Metropolitan  
19 Children's Medical Center, Fuchu, Tokyo, Japan; <sup>3</sup>Department of Emergency Medicine,  
20 Massachusetts General Hospital, Harvard Medical School, Boston, Massachusetts, the United  
21 States  
22  
23  
24  
25  
26  
27  
28  
29  
30  
31

32 **Address correspondence to:** Dr. Shunichiro Nakao  
33

34 Department of Emergency Medicine, University of Ottawa / The Ottawa Hospital - Civic  
35 Campus, 1053 Carling Ave, Room F653, Ottawa, ON K1Y 4E9  
36  
37

38 Tel: 613.798.5555 ext. 15976  
39

40 Email: shunichiro-nakao@umin.ac.jp  
41  
42  
43  
44  
45

46 **Co-authors' address**  
47

48 Akio Kimura, MD, PhD; 1-21-1, Toyama, Shinjuku, Tokyo, Japan, Tel: + 81332027181, Email:  
49 akimura@hosp.ncgm.go.jp  
50  
51

52 Yusuke Hagiwara, MD, MPH; 304 Keyaki-ryo, 2-9-2 Musashidai, Fuchu, Tokyo, Japan, Tel:  
53 +810423005111, Email: yusukehagiwara-tky@umin.ac.jp  
54  
55  
56  
57  
58  
59  
60

1  
2  
3 Kohei Hasegawa, MD, MPH; 326 Cambridge Street, Suite 410, Boston, Tel: 6177245276, Email:  
4  
5 khasegawa1@partners.org  
6  
7  
8  
9  
10

11  
12 **Keywords:** Airway management, intubation, emergency department, practice variation, rapid  
13  
14 sequence intubation  
15  
16

17  
18  
19 **Word Count: 1859**  
20  
21  
22  
23  
24  
25  
26  
27  
28  
29  
30  
31  
32  
33  
34  
35  
36  
37  
38  
39  
40  
41  
42  
43  
44  
45  
46  
47  
48  
49  
50  
51  
52  
53  
54  
55  
56  
57  
58  
59  
60

## Abstract

Objectives: Although successful airway management is essential for emergency trauma care, comprehensive studies are limited. We sought to characterize the current trauma care practice of airway management in the emergency departments (EDs) in Japan.

Design: Analysis of data from a prospective, observational, multi-center registry – the Japanese Emergency Airway Network (JEAN) registry.

Setting: 13 academic and community EDs from different geographic regions across Japan.

Participants: 723 trauma patients who underwent emergency intubation from March 2010 through August 2012.

Outcome measures: ED characteristics, patient and operator demographics, methods of airway management, intubation success or failure at each attempt, and adverse events.

Results: A total of 723 trauma patients who underwent emergency intubation were eligible for the analysis. Traumatic cardiac arrest comprised 32.6% (95% CI, 29.3%-36.1%) of patients.

Rapid sequence intubation (RSI) was the initial method chosen in 23.9% (95% CI, 21.0%-27.2%) of all trauma patients, and in 35.5% (95% CI, 31.4%-39.9%) of non-cardiac arrest trauma patients. Overall, intubation was successful in  $\leq 3$  attempts in 96.0% of patients (95% CI, 94.3%-97.2%). There was a wide variation in the initial methods of intubation; RSI as the initial method was performed in 0% to 50.9% of all trauma patients among the 12 EDs. Similarly, there was a wide variation in success rates and adverse event rates across the EDs. Success rates varied between 35.5% and 90.5% at the first attempt and 85.1% and 100% within 3 attempts across the 12 EDs.

1  
2  
3  
4  
5  
6 Conclusion: In this multicenter prospective study in Japan, we observed a high overall success  
7  
8 rate in airway management during trauma care. However, the methods of intubation and success  
9  
10 rates were highly variable among hospitals.  
11  
12  
13  
14  
15  
16  
17  
18  
19  
20  
21  
22  
23  
24  
25  
26  
27  
28  
29  
30  
31  
32  
33  
34  
35  
36  
37  
38  
39  
40  
41  
42  
43  
44  
45  
46  
47  
48  
49  
50  
51  
52  
53  
54  
55  
56  
57  
58  
59  
60

1  
2  
3  
4  
5 **Article summery**  
6

7 **Article focus**  
8

9 This paper characterizes the current practice of airway management for trauma patients in the  
10 emergency departments (EDs) in Japan by using data from the Japanese Emergency Airway  
11 Network (JEAN) Study.  
12  
13  
14

15 **Key messages**  
16

17 The method of intubation, success rates, and adverse event rates were highly variable among  
18 EDs. Development and dissemination of nationwide protocols are warranted to achieve safer  
19 airway management for trauma victims in Japan.  
20  
21  
22  
23  
24

25 **Strengths and limitations of this study**  
26

27 This is the first to report disparities in trauma airway management based on multicenter,  
28 prospective data.  
29  
30  
31

32 The passive surveillance of the data is subject to self-reporting bias, leading to a possible  
33 underestimation of failed intubations and adverse events.  
34  
35  
36  
37  
38  
39  
40  
41  
42  
43  
44  
45  
46  
47  
48  
49  
50  
51  
52  
53  
54  
55  
56  
57  
58  
59  
60

## 1. Introduction

Successful airway management is a cornerstone in the modern practice of emergency and trauma care. Failure of emergency airway management is often associated with morbidity and mortality in trauma patients. [1-3] Consequently, training in and understanding of airway management is a distinct discipline that is essential for successful trauma resuscitation.

Evidence-based recommendations for airway management during trauma care exist within international and national guidelines of the United States. These guidelines indicate rapid sequence intubation (RSI) as the initial method of emergency airway management in most trauma patients. [1 4 5] Recent studies reported that RSI is the most common airway management method in emergency departments (EDs) in North America and Europe. [6-9] Despite the ubiquitous practice of emergency airway management in trauma patients, little is known about its current practice and performance in other industrialized nations. Therefore, we sought to describe the current practice of airway management for trauma patients in the EDs in Japan.

## 2. METHODS

### Study Design and Setting

We analyzed the data of a prospective, observational, multi-center registry, the Japanese Emergency Airway Network (JEAN) registry. The study design, setting, methods of measurement, and measured variables have been reported elsewhere. [10-13] Briefly, the registry is a consortium of 13 academic and community EDs from different geographic regions across Japan. The participating EDs had a median ED census of 30,000 patient visits per year (range 9,000 to 67,000). All 13 EDs were staffed by attending emergency physicians, and 12 had affiliations with emergency medicine residency training programs. Each hospital maintained individual protocols, policies, and procedures for emergency airway management. Intubations were performed by attending physicians or by resident physicians at the discretion of the ED attending physician. The ethics committee of each participating center approved the protocol, with waiver of informed consent before data collection.

### Patients

The registry prospectively collected information on consecutive patients who underwent airway management in the participating EDs during a 30-month period, from March 2010 to August 2012. All adult and pediatric trauma patients who underwent intubation were eligible for this analysis. We excluded an ED in which the number of trauma intubations was less than 10 from the current analysis.

### Data Collection



1  
2  
3 Data collection was passive, relying on self-reports by the intubators on duty. After each  
4  
5 intubation, the intubators completed a standardized data sheet, including the patient's age, sex,  
6  
7 estimated weight, primary indication for intubation, methods used to facilitate intubation,  
8  
9 intubator's level of training and specialty, number of attempts, success or failure, and  
10  
11 intubation-related adverse events. Method was defined as the set of medications and devices used,  
12  
13 such as RSI with a Macintosh laryngoscope. An intubation attempt was defined as a single  
14  
15 insertion of the laryngoscope (or other device) past the teeth [2 10-13]. For nasal intubations, an  
16  
17 attempt was defined as a single insertion of a tracheal tube past the turbinates. An attempt was  
18  
19 successful if it resulted in the tracheal tube being passed through the vocal cords. One or more  
20  
21 methods could be used in each patient, and each method could be attempted several times.  
22  
23  
24  
25  
26  
27  
28

29 Adverse events were recorded using a pre-specified list, with the option to include additional  
30  
31 comments, if necessary. We monitored compliance with data form completion by reviewing  
32  
33 professional billing records. Where the data collection form was missing, the intubator was  
34  
35 interviewed by one of the investigators within 2 weeks of the patient encounter, to fill out the  
36  
37 data form.  
38  
39  
40  
41  
42

43 The outcomes of interest were the primary indication for intubation, initial method used for  
44  
45 intubation, intubation success rates (on the first attempt and within three attempts), and adverse  
46  
47 event rates.  
48  
49  
50  
51  
52

### 53 **Statistical Analysis**

54  
55 We performed all analysis with JMP 10 software (SAS Institute Inc., Cary, NC, USA). At the  
56  
57  
58  
59  
60

1  
2  
3 patient-level, we described patient demographics, the primary indication for intubation, initial  
4  
5 method of intubation, success rates, and adverse event rates as proportions with 95% confidence  
6  
7 intervals (CIs) and medians with interquartile ranges (IQR). Then, at the ED-level, we described  
8  
9 medians, IQR and ranges for each outcome for all trauma patients. We also repeated the analysis  
10  
11 after stratifying the patients as non-cardiac arrest patients and cardiac arrest patients. All  
12  
13 *P*-values were two-tailed, with  $P < 0.05$  considered statistically significant.  
14  
15  
16  
17  
18  
19  
20  
21  
22  
23  
24  
25  
26  
27  
28  
29  
30  
31  
32  
33  
34  
35  
36  
37  
38  
39  
40  
41  
42  
43  
44  
45  
46  
47  
48  
49  
50  
51  
52  
53  
54  
55  
56  
57  
58  
59  
60

### 3. Results

During the 30-month study period, 4,268 patients required emergency airway management. Of these, the registry recorded 4,094 intubations (capture rate, 95.9%; **Figure 1**), 3370 patients underwent airway management for medical reasons were excluded from the analysis. One of the 13 hospitals, in whom only 1 trauma patient required airway intervention during the study period, was excluded because the number of intubations for trauma care was less than 10 during the study period. Hence, 723 trauma patients were eligible for analysis. Emergency physicians, including emergency medicine residents, performed the first intubation attempts in 60.0% (95% CI, 56.4%-63.5%) of all trauma patients and 66.7% (95% CI, 62.4%-70.8%) of non-cardiac arrest patients. Transitional-year residents (postgraduate years 1 and 2) performed the first intubation attempts in 31.4% (95% CI, 28.1%-34.9%) of all trauma patients and 25.7% (95% CI, 22.0%-29.7%) of non-cardiac arrest patients.

**Table 1** shows the baseline characteristics and primary indications in patients who required trauma airway management. Median age was 56 years; two-thirds of the patients were male. Traumatic cardiac arrest was the reason for intubation in 32.6% (95% CI, 29.3%-36.1%) of all trauma patients, while head trauma accounted for 30.4% (95% CI, 27.2%-33.9%). **Table 2** shows the initial method of airway management in the trauma patients. RSI was the initial method chosen in 23.9% (95% CI, 21.0%-27.2%) of all trauma patients and 35.5% (95% CI, 31.4%-39.9%) of non-cardiac arrest patients. Cricothyrotomy was performed as the initial airway management strategy in 2.2% (95% CI, 1.4%-3.6%) of all trauma patients and 0.4% (95% CI, 0.1%-1.5%) of non-cardiac arrest patients.

**Table 1. Characteristics of the 723 trauma patients who required intubation**

| Patient characteristics               |      |               |
|---------------------------------------|------|---------------|
| Age (y), median, (IQR)                | 56   | (34 - 73)     |
| Male, % (95% CI)                      | 66.9 | (63.4 - 70.3) |
| Estimated weight (kg), median, (IQR)  | 60   | (50 - 70)     |
| Indication for intubation, % (95% CI) |      |               |
| Cardiac arrest                        | 32.6 | (29.3 - 36.1) |
| Head trauma                           | 30.4 | (27.2 - 33.9) |
| Shock                                 | 16.6 | (14.1 - 19.5) |
| Facial/Neck trauma                    | 8.4  | (6.6 - 10.7)  |
| Airway burn                           | 6.8  | (5.2 - 8.8)   |
| Others                                | 5.1  | (3.3 - 8.0)   |

Abbreviations: CI, confidence interval; IQR, interquartile range

**Table 2. Initial method of intubation**

|                             | All trauma patients |      |               | Non-cardiac arrest patients |      |               |
|-----------------------------|---------------------|------|---------------|-----------------------------|------|---------------|
|                             | n                   | %    | 95% CI        | n                           | %    | 95% CI        |
| Rapid sequence intubation   | 173                 | 23.9 | (21.0 - 27.2) | 173                         | 35.5 | (31.4 - 39.9) |
| Sedation without paralysis  | 153                 | 21.2 | (18.3 - 24.3) | 153                         | 31.4 | (27.5 - 35.7) |
| Paralytics without sedation | 19                  | 2.6  | (1.7 - 4.1)   | 19                          | 3.9  | (2.5 - 6.0)   |
| Oral without sedation       | 349                 | 48.3 | (44.6 - 52.0) | 127                         | 26.1 | (22.4 - 30.2) |
| Surgical                    | 16                  | 2.2  | (1.4 - 3.6)   | 2                           | 0.4  | (0.1 - 1.5)   |
| Nasal intubation            | 13                  | 1.8  | (1.1 - 3.1)   | 13                          | 2.7  | (1.6 - 4.5)   |
| Total                       | 723                 | 100  |               | 487                         | 100  |               |

Abbreviations: CI, confidence interval

**Table 3** summarizes the intubation success rates and adverse event rates. Overall, intubation was successful in the first attempt in 63.8% (95% CI, 60.2%-67.2%) and within 3 attempts in 96.0% (95% CI, 94.3%-97.2%) of all trauma patients. In non-cardiac arrest patients, intubation was successful in the first attempt in 60.2% (95% CI, 55.8%-64.4%) and within 3 attempts in 94.5% (95% CI, 92.1%-96.2%) of patients. In cardiac arrest patients, intubation was successful in the first attempt in 71.2% (95% CI, 65.1%-76.6%) and in within 3 attempts in 99.2% (95% CI,

1  
2  
3 97.0%-99.8%) of the patients. Intubation-associated adverse event rates were 10.8% (95% CI,  
4  
5 8.7%-13.3%) in overall trauma patients, 11.5% (95% CI, 9.0%-14.6%) in non-cardiac arrest  
6  
7 patients, and 9.3% (95% CI, 6.2%-13.7%) in cardiac arrest patients.  
8  
9

10  
11  
12 At the ED-level, there was a wide variation in the methods of intubation across the 12 EDs  
13  
14 **(Figure 2)**. For example, RSI as the initial intubation method was performed in 0% to 50.9% of  
15  
16 all trauma patients, and in 0% to 87.5% of non-cardiac arrest patients. Similarly, there was a  
17  
18 wide variation in the success rates and adverse event rates across the EDs **(Figure 3)**. The range  
19  
20 of overall success rates for intubation in the first attempt ranged from 35.5% to 90.5%, and from  
21  
22 85.1% to 100% within 3 attempts. Likewise, overall adverse event rates varied widely (range,  
23  
24 0%-16.7%) across the EDs. These wide variations in intubation success rates and adverse event  
25  
26 rates persisted across the non-cardiac arrest and cardiac arrest strata.  
27  
28  
29  
30  
31  
32  
33  
34  
35  
36  
37  
38  
39  
40  
41  
42  
43  
44  
45  
46  
47  
48  
49  
50  
51  
52  
53  
54  
55  
56  
57  
58  
59  
60

**Table 3. Success rates and intubation-associated adverse events**

|                              | All trauma patients |      |               | Non-cardiac arrest patients |      |               | Cardiac arrest patients |      |               |
|------------------------------|---------------------|------|---------------|-----------------------------|------|---------------|-------------------------|------|---------------|
|                              | n                   | %    | 95% CI        | n                           | %    | 95% CI        | n                       | %    | 95% CI        |
| Successful in 1st attempt    | 461                 | 63.8 | (60.2 - 67.2) | 293                         | 60.2 | (55.8 - 64.4) | 168                     | 71.2 | (65.1 - 76.6) |
| Successful in ≤ 3rd attempts | 694                 | 96.0 | (94.3 - 97.2) | 460                         | 94.5 | (92.1 - 96.2) | 234                     | 99.2 | (97.0 - 99.8) |
| Adverse events               | 78                  | 10.8 | (8.7 - 13.3)  | 56                          | 11.5 | (9.0 - 14.6)  | 22                      | 9.3  | (6.2 - 13.7)  |
| Details of adverse events*   |                     |      |               |                             |      |               |                         |      |               |
| Esophageal intubation†       | 25                  | 3.5  | (2.2 - 5.1)   | 15                          | 3.1  | (1.7 - 5.0)   | 10                      | 4.2  | (2.0 - 7.7)   |
| Mainstem bronchus intubation | 18                  | 2.5  | (1.5 - 3.9)   | 9                           | 1.8  | (0.8 - 3.5)   | 9                       | 3.8  | (1.7 - 7.1)   |
| Airway trauma                | 17                  | 2.4  | (1.4 - 3.7)   | 14                          | 2.9  | (1.6 - 4.8)   | 3                       | 1.3  | (0.3 - 3.7)   |
| Hypotension‡                 | 8                   | 1.1  | (0.5 - 2.2)   | 8                           | 1.6  | (0.7 - 3.2)   |                         |      |               |
| Vomiting                     | 6                   | 0.8  | (0.3 - 1.8)   | 6                           | 1.2  | (0.5 - 2.7)   |                         |      |               |
| Hypoxia                      | 3                   | 0.4  | (0.1 - 1.2)   | 3                           | 0.6  | (0.1 - 1.8)   |                         |      |               |
| Cardiac arrest               | 1                   | 0.1  | (0.0 - 0.8)   | 1                           | 0.2  | (0.0 - 1.1)   |                         |      |               |

Abbreviations: CI, confidence interval

\*Patients may have more than 1 adverse event.

†Pulse oximetry saturation less than 90% during intubation attempt, not a result of esophageal intubation.

‡Hypotension was defined as systolic blood pressure less than 90 mm Hg.

#### 4. Discussion

In this prospective, multicenter, observational study in Japan, we observed an acceptable success rate of airway management in trauma patients in EDs. However, we also found a wide range of variation in the initial method of intubation, success rates, and adverse event rates during trauma airway management across the EDs. Indeed, the overall success rates in the first intubation attempt ranged from 35.5% to 90.5%.

We were struck by the high degree of variation in the methods of airway management in trauma cases across the 12 EDs. The reasons for the observed practice variations are unclear and are likely multifactorial. It is possible that non-RSI methods were attempted in patients who were predicted to have a difficult intubation. However, the difference in the patient population across the EDs cannot fully explain the observed three-fold difference in the use of RSI. Alternatively, it is also possible that non-RSI methods were more frequently used in certain EDs because of the physicians' preference, procedural experiences, training background, or differences in ED staffing and institutional policies.

Our study also demonstrated a high degree of variations in success and adverse event rates among the EDs. Particularly, the success rate at first attempts was highly variable. To the best of our knowledge, this is the first study to demonstrate such inter-hospital variations in success and adverse event rates in trauma airway management in different EDs. We did not assess the reasons for the variations among the EDs; however, inter-hospital differences in patient population, skills or education backgrounds of intubators, drug or device availability in the ED, or any

1  
2  
3 combination of these factors may have contributed to these variations. Alternatively, the  
4  
5 observed wide variation in the intubation method may have led to these variations in success and  
6  
7 adverse event rates.  
8  
9

10  
11  
12 Although international and Japanese trauma care guidelines recommend the use of RSI as the  
13  
14 initial method of emergency airway management in most trauma patients, [1 4 5] the evidence  
15  
16 for accurately predicting patients in whom RSI should be avoided remain limited. [14 15] It is,  
17  
18 therefore, plausible that the scarcity of evidence may have contributed to the practice variations  
19  
20 across the EDs. Our observations should facilitate further investigation of any barriers to the  
21  
22 delivery of safer trauma care nationally. Additionally, building more robust evidence on trauma  
23  
24 airway management, coupled with improved dissemination of these findings, could decrease the  
25  
26 variations in trauma care across the EDs in Japan.  
27  
28  
29  
30  
31  
32  
33

34 Our study has several potential limitations. First, this passive surveillance of the study data is  
35  
36 subject to self-reporting bias, leading to a possible underestimation of failed intubations and  
37  
38 adverse events. However, active independent monitoring of ED intubations is difficult to  
39  
40 accomplish. We did, however, use a self-reporting system with structured data forms, uniform  
41  
42 definitions, and a high capture rate. Second, we did not design this study to measure patient  
43  
44 outcomes, such as long-term mortality or morbidity. A more detailed analysis of adverse events  
45  
46 and outcomes requires following the patients for a longer period. Third, we did not account for  
47  
48 several potential confounders, such as severity of cases and training levels of physicians. Finally,  
49  
50 all EDs in this study were designated as tertiary or academic general hospitals, and all but one of  
51  
52 the EDs were affiliated with an emergency medicine residency program in Japan. Therefore, our  
53  
54  
55  
56  
57  
58  
59  
60



1  
2  
3 inferences may not be generalizable to trauma airway management in non-academic EDs or other  
4  
5 developed nations. These observations, however, are highly relevant from a policy standpoint. As  
6  
7 these EDs provide advanced care for trauma victims and train the majority of emergency  
8  
9 physicians, these EDs have a disproportionate impact on current and future trauma care in EDs.  
10  
11  
12

## 13 14 15 **5. Conclusion**

16  
17 In this multicenter prospective study of emergency airway management in Japan, we found an  
18  
19 acceptable overall success rate in trauma airway management. However, we also found that the  
20  
21 method of intubation, success rates and adverse event rates were highly variable among EDs.  
22  
23  
24 Our findings suggest that development and dissemination of nationwide protocols are warranted  
25  
26 to achieve safer airway management for trauma victims in Japan.  
27  
28  
29  
30  
31  
32  
33  
34  
35  
36  
37  
38  
39  
40  
41  
42  
43  
44  
45  
46  
47  
48  
49  
50  
51  
52  
53  
54  
55  
56  
57  
58  
59  
60

## Acknowledgments

The authors acknowledge the following research personnel at the study hospitals for their assistance with this project: Fukui University Hospital (Hideya Nagai, MD, Hiroshi Morita MD); Fukui Prefectural Hospital (Yukinori Kato, MD, Hidenori Higashi, MD); Japanese Red Cross Medical Center of Wakayama (Hiroshi Okamoto, MD); Kameda Medical Center (Kenzo Tanaka, MD); National Center for Global Health and Medicine (Taigo Sakamoto, MD, Shunichiro Nakao, MD); Nagoya Ekisaikai Hospital (Yukari Goto, MD); Niigata City General Hospital (Nobuhiro Sato, MD, MPH); Obama Municipal Hospital (Takuyo Chiba, MD); Okinawa Chubu Prefectural Hospital (Masashi Okubo, MD); Osaka Saiseikai Senri Hospital (Kazuaki Shigemitsu, MD); and Shonan Kamakura General Hospital (Taichi Imamura, MD).

Finally, we are grateful to our many emergency physicians and residents for their perseverance in pursuing new knowledge about this vital resuscitative procedure.

## Author Contribution

K.H. designed the study, for which S.N. and Y.H. contributed to the data collection and analysis. S.N. wrote the manuscript, which A.K. reviewed.

**Financial Disclosure:** This study was supported by a grant from St. Luke's Life Science Institute and a grant from Massachusetts General Hospital and Brigham and Women's Hospital. The study sponsors have no involvement in designing the study, in the collection, analysis and interpretation of data, in the writing of the manuscript, and in the decision to submit the manuscript for publication.

**Conflict of Interest:** None of the authors have any conflict of interest to declare.

1  
2  
3  
4  
5 **Data Sharing Statement**  
6  
7

8 No additional data available  
9  
10  
11  
12  
13  
14  
15  
16  
17  
18  
19  
20  
21  
22  
23  
24  
25  
26  
27  
28  
29  
30  
31  
32  
33  
34  
35  
36  
37  
38  
39  
40  
41  
42  
43  
44  
45  
46  
47  
48  
49  
50  
51  
52  
53  
54  
55  
56  
57  
58  
59  
60

For peer review only

## References

1. American College of Surgeons CoT. *Advanced Trauma Life Support for Doctors, Student Course Manual*. 8th ed. Chicago, IL, 2008.
2. Walls RM, Brown CA, 3rd, Bair AE, et al. Emergency airway management: a multi-center report of 8937 emergency department intubations. *J Emerg Med* 2011;**41**:347-54 doi: 10.1016/j.jemermed.2010.02.024 [published Online First: 9 Nov 2010].
3. Hussain LM, Redmond AD. Are pre-hospital deaths from accidental injury preventable? *BMJ* 1994;**308**:1077-80 doi: 10.1136/bmj.308.6936.1077.
4. *Japan Advanced Trauma Evaluation and Care (JATEC™) guideline*. 3rd edition ed, 2008.
5. Dunham CM, Barraco RD, Clark DE, et al. Guidelines for emergency tracheal intubation immediately after traumatic injury. *J Trauma* 2003;**55**:162-79 doi: 10.1097/01.ta.0000083335.93868.2c.
6. Graham CA. Emergency department airway management in the UK. *J R Soc Med* 2005;**98**:107-10 doi: 10.1258/jrsm.98.3.107.
7. Sakles JC, Laurin EG, Rantapaa AA, et al. Airway management in the emergency department: a one-year study of 610 tracheal intubations. *Ann Emerg Med* 1998;**31**:325-32 doi: 10.1016/S0196-0644(98)70342-7.
8. Sagarin MJ, Barton ED, Chng YM, et al. Airway management by US and Canadian emergency medicine residents: a multicenter analysis of more than 6,000 endotracheal intubation attempts. *Ann Emerg Med* 2005;**46**:328-36 doi: 10.1016/j.annemergmed.2005.01.009.
9. Graham CA, Beard D, Henry JM, et al. Rapid sequence intubation of trauma patients in Scotland. *J Trauma* 2004;**56**:1123-6 doi: 10.1097/01.TA.0000109066.62811.8A.

- 1  
2  
3  
4  
5  
6  
7  
8  
9  
10  
11  
12  
13  
14  
15  
16  
17  
18  
19  
20  
21  
22  
23  
24  
25  
26  
27  
28  
29  
30  
31  
32  
33  
34  
35  
36  
37  
38  
39  
40  
41  
42  
43  
44  
45  
46  
47  
48  
49  
50  
51  
52  
53  
54  
55  
56  
57  
58  
59  
60
10. Hasegawa K, Hagiwara Y, Chiba T, et al. Emergency airway management in Japan: Interim analysis of a multi-center prospective observational study. *Resuscitation* 2012;**83**:428-33 doi: 10.1016/j.resuscitation.2011.11.027 [published Online First: 8 Dec 2011].
  11. Hasegawa K, Shigemitsu K, Hagiwara Y, et al. Association between repeated intubation attempts and adverse events in emergency departments: an analysis of a multicenter prospective observational study. *Ann Emerg Med* 2012;**60**:749-54 e2 doi: 10.1016/j.annemergmed.2012.04.005 [published Online First: 28 Apr 2012].
  12. Imamura T, Brown CA, 3rd, Ofuchi H, et al. Emergency airway management in geriatric and younger patients: analysis of a multicenter prospective observational study. *Am J Emerg Med* 2013;**31**:190-6 doi: 10.1016/j.ajem.2012.07.008 [published Online First: 18 Oct 2012].
  13. Hasegawa K, Hagiwara Y, Imamura T, et al. Increased incidence of hypotension in elderly patients who underwent emergency airway management: an analysis of a multi-centre prospective observational study. *Int J Emerg Med* 2013;**6**:12 doi: 10.1186/1865-1380-6-12.
  14. Reed MJ, Dunn MJ, McKeown DW. Can an airway assessment score predict difficulty at intubation in the emergency department? *Emerg Med J* 2005;**22**:99-102 doi: 10.1136/emj.2003.008771.
  15. Soyuncu S, Eken C, Cete Y, et al. Determination of difficult intubation in the ED. *Am J Emerg Med* 2009;**27**:905-10 doi: 10.1016/j.ajem.2008.07.003.

## Figure Legends

### Figure 1. Flow chart showing inclusion of patients in this study

### Figure 2. Inter-hospital variations in initial methods of intubation

Boxplots of inter-hospital variations in the initial methods of intubation. The line in the middle of the box represents the median, with the lower and upper limits of the box representing the 25th and 75th percentiles, respectively. The whiskers from the box extend to the minimum and maximum values.

### Figure 3. Inter-hospital variations in success rates and adverse event rates

Boxplots of inter-hospital variations in success rates and adverse event rates. The line in the middle of the box represents the median, with the lower and upper limits of the box representing the 25th and 75th percentiles. The whiskers from the box extend to the minimum and maximum values.

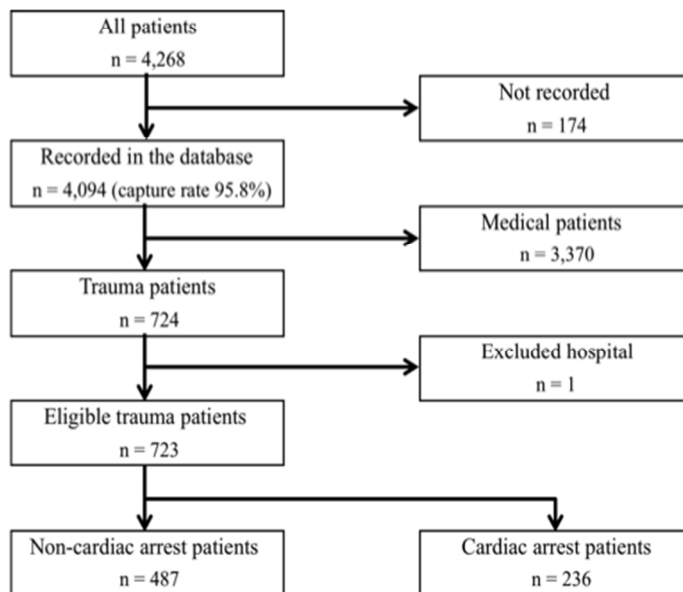

Flow chart showing inclusion of patients in this study  
254x190mm (72 x 72 DPI)

Review only

1  
2  
3  
4  
5  
6  
7  
8  
9  
10  
11  
12  
13  
14  
15  
16  
17  
18  
19  
20  
21  
22  
23  
24  
25  
26  
27  
28  
29  
30  
31  
32  
33  
34  
35  
36  
37  
38  
39  
40  
41  
42  
43  
44  
45  
46  
47  
48  
49  
50  
51  
52  
53  
54  
55  
56  
57  
58  
59  
60

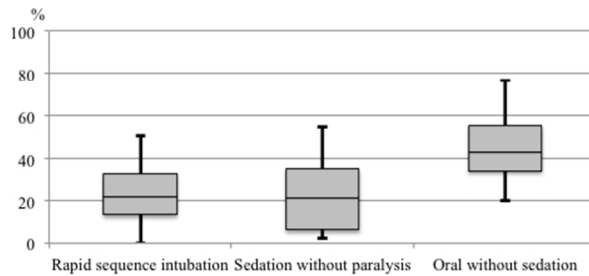

a. Among all trauma patients

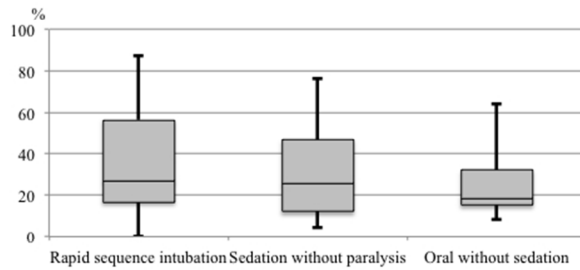

b. Among non-cardiac arrest patients

Inter-hospital variations in initial methods of intubation  
Boxplots of inter-hospital variations in the initial methods of intubation. The line in the middle of the box represents the median, with the lower and upper limits of the box representing the 25th and 75th percentiles, respectively. The whiskers from the box extend to the minimum and maximum values.  
254x338mm (72 x 72 DPI)



1  
2  
3  
4  
5  
6  
7  
8  
9  
10  
11  
12  
13  
14  
15  
16  
17  
18  
19  
20  
21  
22  
23  
24  
25  
26  
27  
28  
29  
30  
31  
32  
33  
34  
35  
36  
37  
38  
39  
40  
41  
42  
43  
44  
45  
46  
47  
48  
49  
50  
51  
52  
53  
54  
55  
56  
57  
58  
59  
60

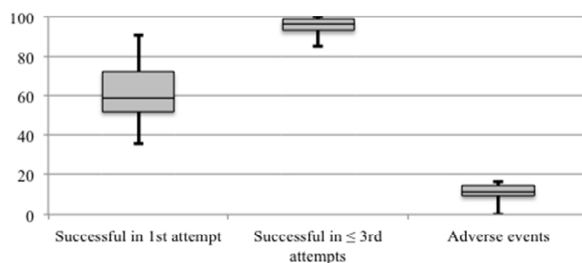

a. Among all trauma patients

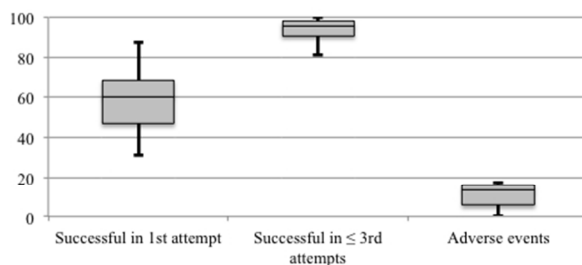

b. Among non-cardiac arrest patients

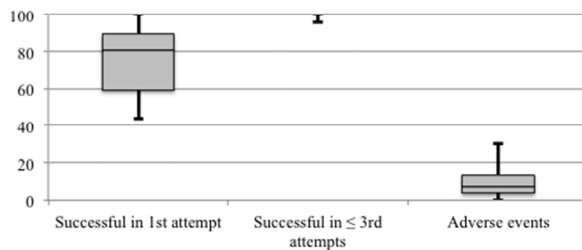

c. Among cardiac arrest patients

Inter-hospital variations in success rates and adverse event rates  
 Boxplots of inter-hospital variations in success rates and adverse event rates. The line in the middle of the box represents the median, with the lower and upper limits of the box representing the 25th and 75th percentiles. The whiskers from the box extend to the minimum and maximum values.  
 254x338mm (72 x 72 DPI)

# BMJ Open

## Trauma airway management in emergency departments: A multicenter, prospective, observational study in Japan

|                                 |                                                                                                                                                                                                                                                                                                                                                                                                                                                     |
|---------------------------------|-----------------------------------------------------------------------------------------------------------------------------------------------------------------------------------------------------------------------------------------------------------------------------------------------------------------------------------------------------------------------------------------------------------------------------------------------------|
| Journal:                        | <i>BMJ Open</i>                                                                                                                                                                                                                                                                                                                                                                                                                                     |
| Manuscript ID:                  | bmjopen-2014-006623.R1                                                                                                                                                                                                                                                                                                                                                                                                                              |
| Article Type:                   | Research                                                                                                                                                                                                                                                                                                                                                                                                                                            |
| Date Submitted by the Author:   | 14-Nov-2014                                                                                                                                                                                                                                                                                                                                                                                                                                         |
| Complete List of Authors:       | Nakao, Shunichiro; University of Ottawa / The Ottawa Hospital - Civic Campus, Department of Emergency Medicine<br>Kimura, Akio; National Center for Global Health and Medicine, Department of Emergency Medicine and Critical Care<br>Hagiwara, Yusuke; Tokyo Metropolitan Children's Medical Center, Department of Emergency Medicine<br>Hasegawa, Kohei; Massachusetts General Hospital, Harvard Medical School, Department of Emergency Medicine |
| <b>Primary Subject Heading</b>: | Emergency medicine                                                                                                                                                                                                                                                                                                                                                                                                                                  |
| Secondary Subject Heading:      | Medical management                                                                                                                                                                                                                                                                                                                                                                                                                                  |
| Keywords:                       | TRAUMA MANAGEMENT, ACCIDENT & EMERGENCY MEDICINE, MEDICAL EDUCATION & TRAINING                                                                                                                                                                                                                                                                                                                                                                      |
|                                 |                                                                                                                                                                                                                                                                                                                                                                                                                                                     |

SCHOLARONE™  
Manuscripts

1  
2  
3 **Trauma airway management in emergency departments: A multicenter, prospective,**  
4 **observational study in Japan**  
5  
6  
7  
8  
9

10 Shunichiro Nakao, MD<sup>1</sup>; Akio Kimura, MD, PhD<sup>1</sup>; Yusuke Hagiwara, MD, MPH<sup>2</sup>; and Kohei  
11 Hasegawa, MD, MPH<sup>3</sup>, on behalf of the Japanese Emergency Medicine Network Investigators  
12  
13  
14  
15

16  
17 <sup>1</sup>Department of Emergency Medicine and Critical Care, National Center for Global Health and  
18 Medicine, Shinjuku, Tokyo, Japan; <sup>2</sup>Department of Emergency Medicine, Tokyo Metropolitan  
19 Children's Medical Center, Fuchu, Tokyo, Japan; <sup>3</sup>Department of Emergency Medicine,  
20 Massachusetts General Hospital, Harvard Medical School, Boston, Massachusetts, the United  
21 States  
22  
23  
24  
25  
26  
27  
28  
29  
30  
31

32 **Address correspondence to:** Dr. Shunichiro Nakao  
33

34 Department of Emergency Medicine, University of Ottawa / The Ottawa Hospital - Civic  
35 Campus, 1053 Carling Ave, Room F653, Ottawa, ON K1Y 4E9  
36  
37

38 Tel: 613.798.5555 ext. 15976  
39

40 Email: shunichiro-nakao@umin.ac.jp  
41  
42  
43  
44  
45

46 **Co-authors' address**  
47

48 Akio Kimura, MD, PhD; 1-21-1, Toyama, Shinjuku, Tokyo, Japan, Tel: + 81332027181, Email:  
49

50 akimura@hosp.ncgm.go.jp  
51  
52

53 Yusuke Hagiwara, MD, MPH; 304 Keyaki-ryo, 2-9-2 Musashidai, Fuchu, Tokyo, Japan, Tel:  
54

55 +810423005111, Email: yusukehagiwara-tky@umin.ac.jp  
56  
57  
58  
59  
60

1  
2  
3 Kohei Hasegawa, MD, MPH; 326 Cambridge Street, Suite 410, Boston, Tel: 6177245276, Email:  
4  
5 khasegawa1@partners.org  
6  
7  
8  
9  
10  
11

12 **Financial Disclosure:** This study was supported by a grant from St. Luke's Life Science Institute  
13 and a grant from Massachusetts General Hospital and Brigham and Women's Hospital. The study  
14 sponsors have no involvement in designing the study, in the collection, analysis and  
15 interpretation of data, in the writing of the manuscript, and in the decision to submit the  
16 manuscript for publication.  
17  
18  
19  
20  
21  
22  
23  
24  
25  
26

27 **Keywords:** Airway management, intubation, emergency department, practice variation, rapid  
28 sequence intubation  
29  
30  
31  
32  
33

34 **Word Count: 2045**  
35  
36  
37  
38  
39  
40  
41  
42  
43  
44  
45  
46  
47  
48  
49  
50  
51  
52  
53  
54  
55  
56  
57  
58  
59  
60

## Abstract

Objectives: Although successful airway management is essential for emergency trauma care, comprehensive studies are limited. We sought to characterize the current trauma care practice of airway management in the emergency departments (EDs) in Japan.

Design: Analysis of data from a prospective, observational, multi-center registry – the Japanese Emergency Airway Network (JEAN) registry.

Setting: 13 academic and community EDs from different geographic regions across Japan.

Participants: 723 trauma patients who underwent emergency intubation from March 2010 through August 2012.

Outcome measures: ED characteristics, patient and operator demographics, methods of airway management, intubation success or failure at each attempt, and adverse events.

Results: A total of 723 trauma patients who underwent emergency intubation were eligible for the analysis. Traumatic cardiac arrest comprised 32.6% (95% CI, 29.3%-36.1%) of patients.

Rapid sequence intubation (RSI) was the initial method chosen in 23.9% (95% CI, 21.0%-27.2%) of all trauma patients, and in 35.5% (95% CI, 31.4%-39.9%) of non-cardiac arrest trauma patients. Overall, intubation was successful in  $\leq 3$  attempts in 96.0% of patients (95% CI, 94.3%-97.2%). There was a wide variation in the initial methods of intubation; RSI as the initial method was performed in 0% to 50.9% of all trauma patients among 12 EDs. Similarly, there was a wide variation in success rates and adverse event rates across the EDs. Success rates varied between 35.5% and 90.5% at the first attempt and 85.1% and 100% within 3 attempts across the 12 EDs.

1  
2  
3  
4  
5  
6 Conclusion: In this multicenter prospective study in Japan, we observed a high overall success  
7  
8 rate in airway management during trauma care. However, the methods of intubation and success  
9  
10 rates were highly variable among hospitals.  
11  
12  
13  
14  
15  
16  
17  
18  
19  
20  
21  
22  
23  
24  
25  
26  
27  
28  
29  
30  
31  
32  
33  
34  
35  
36  
37  
38  
39  
40  
41  
42  
43  
44  
45  
46  
47  
48  
49  
50  
51  
52  
53  
54  
55  
56  
57  
58  
59  
60

1  
2  
3  
4  
5 **Article summary**  
6

7 **Article focus**  
8

9 This paper characterizes the current practice of airway management for trauma patients in  
10 emergency departments (EDs) in Japan by using data from the Japanese Emergency Airway  
11 Network (JEAN) Study.  
12  
13  
14

15  
16 **Key messages**  
17

18 The method of intubation, success rates, and adverse event rates are highly variable among EDs.  
19  
20 Development and dissemination of nationwide protocols are warranted to achieve safer airway  
21 management for trauma victims in Japan.  
22  
23  
24

25  
26 **Strengths and limitations of this study**  
27

28 This is the first study to report disparities in trauma airway management based on multicenter,  
29 prospective data.  
30  
31

32 Passive surveillance of data is subject to self-reporting bias, leading to a possible  
33 underestimation of failed intubations and adverse events.  
34  
35  
36  
37  
38  
39  
40  
41  
42  
43  
44  
45  
46  
47  
48  
49  
50  
51  
52  
53  
54  
55  
56  
57  
58  
59  
60

## 1. INTRODUCTION

Successful airway management is a cornerstone in the modern practice of emergency and trauma care. Failure of emergency airway management is often associated with morbidity and mortality in trauma patients. [1-3] Consequently, training in and understanding of airway management is a distinct discipline that is essential for successful trauma resuscitation.

Evidence-based recommendations for airway management during trauma care exist within international and national guidelines of the United States. These guidelines indicate rapid sequence intubation (RSI) as the initial method of emergency airway management in most trauma patients. [1 4 5] Recent studies reported that RSI is the most common airway management method in emergency departments (EDs) in North America and Europe. [6-9] Despite the ubiquitous practice of emergency airway management in trauma patients, little is known about its current practice and performance in other industrialized nations. Therefore, we sought to describe the current practice of airway management for trauma patients in the EDs in Japan.



## 2. METHODS

### Study Design and Setting

We analyzed the data of a prospective, observational, multi-center registry, the Japanese Emergency Airway Network (JEAN) registry. The study design, setting, methods of measurement, and measured variables have been reported elsewhere. [10-13] Briefly, the registry is a consortium of 13 academic and community EDs from different geographic regions across Japan. These EDs consisted of 10 tertiary medical centers that have a capability to manage the most severe trauma patients and 3 secondary medical centers that are designated to treat moderately severe trauma patients. The participating EDs had a median ED census of 30,000 patient visits per year (range 9,000 to 67,000). All 13 EDs were staffed by attending emergency physicians, and 12 had affiliations with emergency medicine residency training programs. Each hospital maintained individual protocols, policies, and procedures for emergency airway management. Intubations were performed by attending physicians or by resident physicians at the discretion of the ED attending physician. The ethics committee of each participating center approved the protocol, with waiver of informed consent before data collection.

### Patients

The registry prospectively collected information on consecutive patients who underwent airway management in the participating EDs during a 30-month period, from March 2010 to August 2012. All adult and pediatric trauma patients who underwent intubation were eligible for this analysis. We excluded an ED in which the number of trauma intubations was less than 10 from the current analysis.

## Data Collection

Data collection was passive, relying on self-reports by the intubators on duty. After each intubation, the intubators completed a standardized data sheet, including the patient's age, sex, estimated weight, primary indication for intubation, methods used to facilitate intubation, intubator's level of training (emergency physicians, resident physicians, and transitional year residents) and specialty (emergency physician or not), number of attempts, success or failure, and intubation-related adverse events. Method was defined as the set of medications and devices used, such as RSI with a Macintosh laryngoscope. Transitional-years residents were post-graduate year 1-2 physicians who rotate through the ED. An intubation attempt was defined as a single insertion of the laryngoscope (or other device) past the teeth [2 10-13]. For nasal intubations, an attempt was defined as a single insertion of a tracheal tube past the turbinates. An attempt was successful if it resulted in the tracheal tube being passed through the vocal cords. One or more methods could be used in each patient, and each method could be attempted several times.

Adverse events were recorded using a pre-specified list, with the option to include additional comments, if necessary. We monitored compliance with data form completion by reviewing professional billing records. Where the data collection form was missing, the intubator was interviewed by one of the investigators within 2 weeks of the patient encounter, to fill out the data form.

The outcomes of interest were the primary indication for intubation, initial method used for

1  
2  
3 intubation, intubation success rates (on the first attempt and within three attempts), and adverse  
4  
5 event rates.  
6  
7  
8  
9

### 10 **Statistical Analysis**

11  
12 We performed all analysis with JMP 10 software (SAS Institute Inc., Cary, NC, USA). At the  
13  
14 patient-level, we described patient demographics, the primary indication for intubation, initial  
15  
16 method of intubation, success rates, and adverse event rates as proportions with 95% confidence  
17  
18 intervals (CIs) and medians with interquartile ranges (IQR). Then, at the ED-level, we described  
19  
20 medians, IQR and ranges for each outcome for all trauma patients. We also repeated the analysis  
21  
22 after stratifying by indication (non-cardiac arrest vs. cardiac arrest) and specialty (emergency  
23  
24 physicians vs. non-emergency physicians). All *P*-values were two-tailed, with *P*<0.05 considered  
25  
26 statistically significant.  
27  
28  
29  
30  
31  
32  
33  
34  
35  
36  
37  
38  
39  
40  
41  
42  
43  
44  
45  
46  
47  
48  
49  
50  
51  
52  
53  
54  
55  
56  
57  
58  
59  
60

### 3. RESULTS

During the 30-month study period, 4,268 patients required emergency airway management. Of these, the registry recorded 4,094 intubations (capture rate, 95.9%; **Figure 1**), of which 3370 patients who underwent airway management for medical reasons were excluded from the analysis. One of the 13 hospitals, in whom only 1 trauma patient required airway intervention during the study period, was excluded because the number of intubations for trauma care was less than 10 during the study period. Hence, 723 trauma patients were eligible for analysis.

Emergency physicians, including emergency medicine residents, performed the first intubation attempts in 60.0% (95% CI, 56.4%-63.5%) of all trauma patients and 66.7% (95% CI, 62.4%-70.8%) of non-cardiac arrest patients. Transitional-year residents (postgraduate years 1 and 2) performed the first intubation attempts in 31.4% (95% CI, 28.1%-34.9%) of all trauma patients and 25.7% (95% CI, 22.0%-29.7%) of non-cardiac arrest patients.

**Table 1** shows the baseline characteristics and primary indications in patients who required trauma airway management. Median age was 56 years; two-thirds of the patients were male. Traumatic cardiac arrest was the reason for intubation in 32.6% (95% CI, 29.3%-36.1%) of all trauma patients, while head trauma accounted for 30.4% (95% CI, 27.2%-33.9%). **Table 2** shows the initial method of airway management in the trauma patients. RSI was the initial method chosen in 23.9% (95% CI, 21.0%-27.2%) of all trauma patients and 35.5% (95% CI, 31.4%-39.9%) of non-cardiac arrest patients. Cricothyrotomy was performed as the initial airway management strategy in 2.2% (95% CI, 1.4%-3.6%) of all trauma patients and 0.4% (95% CI, 0.1%-1.5%) of non-cardiac arrest patients.

**Table 1. Characteristics of the 723 trauma patients who required intubation**

| Patient characteristics               |      |               |
|---------------------------------------|------|---------------|
| Age (y), median, (IQR)                | 56   | (34 - 73)     |
| Male, % (95% CI)                      | 66.9 | (63.4 - 70.3) |
| Estimated weight (kg), median, (IQR)  | 60   | (50 - 70)     |
| Indication for intubation, % (95% CI) |      |               |
| Cardiac arrest                        | 32.6 | (29.3 - 36.1) |
| Head trauma                           | 30.4 | (27.2 - 33.9) |
| Shock                                 | 16.6 | (14.1 - 19.5) |
| Facial/Neck trauma                    | 8.4  | (6.6 - 10.7)  |
| Airway burn                           | 6.8  | (5.2 - 8.8)   |
| Others                                | 5.1  | (3.3 - 8.0)   |

Abbreviations: CI, confidence interval; IQR, interquartile range

**Table 2. Initial method of intubation**

|                             | All trauma patients |      |               | Non-cardiac arrest patients |      |               |
|-----------------------------|---------------------|------|---------------|-----------------------------|------|---------------|
|                             | n                   | %    | 95% CI        | n                           | %    | 95% CI        |
| Rapid sequence intubation   | 173                 | 23.9 | (21.0 - 27.2) | 173                         | 35.5 | (31.4 - 39.9) |
| Sedation without paralysis  | 153                 | 21.2 | (18.3 - 24.3) | 153                         | 31.4 | (27.5 - 35.7) |
| Paralytics without sedation | 19                  | 2.6  | (1.7 - 4.1)   | 19                          | 3.9  | (2.5 - 6.0)   |
| Oral without sedation       | 349                 | 48.3 | (44.6 - 52.0) | 127                         | 26.1 | (22.4 - 30.2) |
| Surgical                    | 16                  | 2.2  | (1.4 - 3.6)   | 2                           | 0.4  | (0.1 - 1.5)   |
| Nasal intubation            | 13                  | 1.8  | (1.1 - 3.1)   | 13                          | 2.7  | (1.6 - 4.5)   |
| Total                       | 723                 | 100  |               | 487                         | 100  |               |

Abbreviations: CI, confidence interval

**Table 3** summarizes the intubation success rates and adverse event rates. Overall, intubation was successful in the first attempt in 63.8% (95% CI, 60.2%-67.2%) and within 3 attempts in 96.0% (95% CI, 94.3%-97.2%) of all trauma patients. In non-cardiac arrest patients, intubation was successful in the first attempt in 60.2% (95% CI, 55.8%-64.4%) and within 3 attempts in 94.5% (95% CI, 92.1%-96.2%) of patients. In cardiac arrest patients, intubation was successful in the first attempt in 71.2% (95% CI, 65.1%-76.6%) and within 3 attempts in 99.2% (95% CI,

1  
2  
3 97.0%-99.8%) of the patients. In the stratified analysis by the specialty (i.e., emergency  
4  
5  
6 physicians [n=434] vs. non-emergency physicians [n=289]), emergency physicians had a higher  
7  
8 success at the first attempt (72.8 % vs. 50.2 %,  $p<0.001$ ) compared to non-emergency physicians.  
9  
10 Intubation-associated adverse event rates were 10.8% (95% CI, 8.7%-13.3%) in overall trauma  
11  
12 patients, 11.5% (95% CI, 9.0%-14.6%) in non-cardiac arrest patients, and 9.3% (95% CI,  
13  
14 6.2%-13.7%) in cardiac arrest patients.  
15  
16  
17  
18  
19

20 At the ED-level, there was a wide variation in the methods of intubation across the 12 EDs  
21  
22 **(Figure 2)**. For example, RSI as the initial intubation method was performed in 0% to 50.9% of  
23  
24 all trauma patients, and in 0% to 87.5% of non-cardiac arrest patients. Similarly, there was a  
25  
26 wide variation in the success rates and adverse event rates across the EDs **(Figure 3)**. The range  
27  
28 of overall success rates for intubation in the first attempt ranged from 35.5% to 90.5%, and from  
29  
30 85.1% to 100% within 3 attempts. Likewise, overall adverse event rates varied widely (range,  
31  
32 0%-16.7%) across the EDs. These wide variations in intubation success rates and adverse event  
33  
34 rates persisted across the non-cardiac arrest and cardiac arrest strata.  
35  
36  
37  
38  
39  
40  
41  
42  
43  
44  
45  
46  
47  
48  
49  
50  
51  
52  
53  
54  
55  
56  
57  
58  
59  
60

**Table 3. Success rates and intubation-associated adverse events**

|                              | All trauma patients |      |               | Non-cardiac arrest patients |      |               | Cardiac arrest patients |      |               |
|------------------------------|---------------------|------|---------------|-----------------------------|------|---------------|-------------------------|------|---------------|
|                              | n                   | %    | 95% CI        | n                           | %    | 95% CI        | n                       | %    | 95% CI        |
| Successful in 1st attempt    | 461                 | 63.8 | (60.2 - 67.2) | 293                         | 60.2 | (55.8 - 64.4) | 168                     | 71.2 | (65.1 - 76.6) |
| Successful in ≤ 3rd attempts | 694                 | 96.0 | (94.3 - 97.2) | 460                         | 94.5 | (92.1 - 96.2) | 234                     | 99.2 | (97.0 - 99.8) |
| Adverse events               | 78                  | 10.8 | (8.7 - 13.3)  | 56                          | 11.5 | (9.0 - 14.6)  | 22                      | 9.3  | (6.2 - 13.7)  |
| Details of adverse events*   |                     |      |               |                             |      |               |                         |      |               |
| Esophageal intubation        | 25                  | 3.5  | (2.2 - 5.1)   | 15                          | 3.1  | (1.7 - 5.0)   | 10                      | 4.2  | (2.0 - 7.7)   |
| Mainstem bronchus intubation | 18                  | 2.5  | (1.5 - 3.9)   | 9                           | 1.8  | (0.8 - 3.5)   | 9                       | 3.8  | (1.7 - 7.1)   |
| Airway trauma                | 17                  | 2.4  | (1.4 - 3.7)   | 14                          | 2.9  | (1.6 - 4.8)   | 3                       | 1.3  | (0.3 - 3.7)   |
| Hypotension†                 | 8                   | 1.1  | (0.5 - 2.2)   | 8                           | 1.6  | (0.7 - 3.2)   |                         |      |               |
| Vomiting                     | 6                   | 0.8  | (0.3 - 1.8)   | 6                           | 1.2  | (0.5 - 2.7)   |                         |      |               |
| Hypoxia‡                     | 3                   | 0.4  | (0.1 - 1.2)   | 3                           | 0.6  | (0.1 - 1.8)   |                         |      |               |
| Cardiac arrest               | 1                   | 0.1  | (0.0 - 0.8)   | 1                           | 0.2  | (0.0 - 1.1)   |                         |      |               |

Abbreviations: CI, confidence interval

\*Patients may have more than 1 adverse event.

†Hypotension was defined as systolic blood pressure less than 90 mm Hg.

‡Hypoxia was defined as pulse oximetric oxygen saturation of less than 90% during intubation attempts, not as a result of esophageal intubation.

#### 4. DISCUSSION

In this prospective, multicenter, observational study in Japan, we observed an acceptable success rate of airway management in trauma patients in EDs. However, we also found a wide range of variation in the initial method of intubation, success rates, and adverse event rates during trauma airway management across the EDs. Indeed, the overall success rates in the first intubation attempt ranged from 35.5% to 90.5%.

We were struck by the high degree of variation in the methods of airway management in trauma cases across the 12 EDs. The reasons for the observed practice variations are unclear and are likely multifactorial. It is possible that non-RSI methods were attempted in patients who were predicted to have a difficult intubation. However, the difference in the patient population across the EDs cannot fully explain the observed three-fold difference in the use of RSI. Alternatively, it is also possible that non-RSI methods were more frequently used in certain EDs because of the physicians' preference, procedural experiences, training background, or differences in ED staffing and institutional policies.

Our study also demonstrated a high degree of variations in success and adverse event rates among the EDs. Particularly, the success rate at first attempts was highly variable. To the best of our knowledge, this is the first study to demonstrate such inter-hospital variations in success and adverse event rates in trauma airway management in different EDs. The reasons for the variations among the EDs are likely multifactorial; the potential explanations include inter-hospital differences in patient population, skills or education backgrounds of intubators,[14]



1  
2  
3 drug and device availability in the ED, or any combination of these factors. Alternatively, the  
4  
5 observed wide variation in the intubation method may have led to these variations in success and  
6  
7 adverse event rates. Furthermore, there are no requirements for procedural credentials to perform  
8  
9 ED intubations both in individuals and institutions in Japan. [10] This lack of procedural  
10  
11 requirements would have contributed, at least partially, to the observed inter-hospital variations  
12  
13 in the success rates.  
14  
15

16  
17  
18  
19  
20 Although international and Japanese trauma care guidelines recommend the use of RSI as the  
21  
22 initial method of emergency airway management in most trauma patients, [1 4 5] the evidence  
23  
24 for accurately predicting patients in whom RSI should be avoided remain limited. [15 16] It is,  
25  
26 therefore, plausible that the scarcity of evidence may have contributed to the practice variations  
27  
28 across the EDs. Our observations should facilitate further investigation of any barriers to the  
29  
30 delivery of safer trauma care nationally. Additionally, building more robust evidence on trauma  
31  
32 airway management, coupled with improved dissemination of these findings, could decrease the  
33  
34 variations in trauma care across the EDs in Japan.  
35  
36  
37  
38  
39

40  
41 Our study has several potential limitations. First, this passive surveillance of the study data is  
42  
43 subject to self-reporting bias, leading to a possible underestimation of failed intubations and  
44  
45 adverse events. However, active independent monitoring of ED intubations is difficult to  
46  
47 accomplish. We did, however, use a self-reporting system with structured data forms, uniform  
48  
49 definitions, and a high capture rate. Second, we did not design this study to measure patient  
50  
51 outcomes, such as long-term mortality or morbidity. A more detailed analysis of adverse events  
52  
53 and outcomes requires following the patients for a longer period. Third, we did not account for  
54  
55  
56  
57  
58  
59  
60

1  
2  
3 several potential confounders, such as severities (the Injury Severity Score, the Revised Trauma  
4 Score, etc.) of cases and training levels of physicians. However, this prospective multicenter data  
5  
6 reflect the current airway management in the natural setting of a “real” population and current  
7  
8 clinical practice, therefore enhancing the potential generalizability of the findings. Finally, all  
9  
10 EDs in this study were designated as tertiary or academic general hospitals, and all but one of the  
11  
12 EDs were affiliated with an emergency medicine residency program in Japan. Therefore, our  
13  
14 inferences may not be generalizable to trauma airway management in non-academic EDs or other  
15  
16 developed nations. These observations, however, are highly relevant from a policy standpoint. As  
17  
18 these EDs provide advanced care for trauma victims and train the majority of emergency  
19  
20 physicians, these EDs have a disproportionate impact on current and future trauma care in EDs.  
21  
22  
23  
24  
25  
26  
27  
28

## 29 **5. CONCLUSION**

30  
31 In this multicenter prospective study of emergency airway management in Japan, we found an  
32  
33 acceptable overall success rate in trauma airway management. However, we also found that the  
34  
35 method of intubation, success rates and adverse event rates were highly variable among EDs. For  
36  
37 researchers, our observations should facilitate further investigations to identify the reasons of the  
38  
39 inter-hospital variations. Additionally, for policy makers and professional organizations, our  
40  
41 findings suggest that development and dissemination of nationwide protocols are warranted to  
42  
43 achieve safer airway management for trauma victims in Japan.  
44  
45  
46  
47  
48  
49  
50  
51  
52  
53  
54  
55  
56  
57  
58  
59  
60

## Acknowledgments

The authors acknowledge the following research personnel at the study hospitals for their assistance with this project: Fukui University Hospital (Hideya Nagai, MD, Hiroshi Morita MD); Fukui Prefectural Hospital (Yukinori Kato, MD, Hidenori Higashi, MD); Japanese Red Cross Medical Center of Wakayama (Hiroshi Okamoto, MD); Kameda Medical Center (Kenzo Tanaka, MD); National Center for Global Health and Medicine (Taigo Sakamoto, MD, Shunichiro Nakao, MD); Nagoya Ekisaikai Hospital (Yukari Goto, MD); Niigata City General Hospital (Nobuhiro Sato, MD, MPH); Obama Municipal Hospital (Takuyo Chiba, MD); Okinawa Chubu Prefectural Hospital (Masashi Okubo, MD); Osaka Saiseikai Senri Hospital (Kazuaki Shigemitsu, MD); and Shonan Kamakura General Hospital (Taichi Imamura, MD).

Finally, we are grateful to our many emergency physicians and residents for their perseverance in pursuing new knowledge about this vital resuscitative procedure.

## Author Contribution

K.H. designed the study, for which S.N. and Y.H. contributed to the data collection and analysis.

S.N. wrote the manuscript, which A.K. reviewed.

**Conflict of Interest:** None of the authors have any conflict of interest to declare.

## Data Sharing Statement

No additional data available

## Figure Legends

### Figure 1. Flow chart showing inclusion of patients in this study

### Figure 2. Inter-hospital variations in initial methods of intubation

Boxplots of inter-hospital variations in the initial methods of intubation. The line in the middle of the box represents the median, with the lower and upper limits of the box representing the 25th and 75th percentiles, respectively. The whiskers from the box extend to the minimum and maximum values.

### Figure 3. Inter-hospital variations in success rates and adverse event rates

Boxplots of inter-hospital variations in success rates and adverse event rates. The line in the middle of the box represents the median, with the lower and upper limits of the box representing the 25th and 75th percentiles. The whiskers from the box extend to the minimum and maximum values.

## References

1. American College of Surgeons CoT. *Advanced Trauma Life Support for Doctors, Student Course Manual*. 8th ed. Chicago, IL, 2008.
2. Walls RM, Brown CA, 3rd, Bair AE, et al. Emergency airway management: a multi-center report of 8937 emergency department intubations. *The Journal of emergency medicine* 2011;41:347-54 doi: 10.1016/j.jemermed.2010.02.024.
3. Hussain LM, Redmond AD. Are pre-hospital deaths from accidental injury preventable? *Bmj* 1994;308:1077-80 doi: 10.1136/bmj.308.6936.1077.
4. *Japan Advanced Trauma Evaluation and Care (JATEC™) guideline*. 3rd edition ed, 2008.
5. Dunham CM, Barraco RD, Clark DE, et al. Guidelines for emergency tracheal intubation immediately after traumatic injury. *The Journal of trauma* 2003;55:162-79 doi: 10.1097/01.ta.0000083335.93868.2c.
6. Graham CA. Emergency department airway management in the UK. *Journal of the Royal Society of Medicine* 2005;98:107-10 doi: 10.1258/jrsm.98.3.107.
7. Sakles JC, Laurin EG, Rantapaa AA, et al. Airway management in the emergency department: a one-year study of 610 tracheal intubations. *Annals of emergency medicine* 1998;31:325-32 doi: 10.1016/S0196-0644(98)70342-7.
8. Sagarin MJ, Barton ED, Chng YM, et al. Airway management by US and Canadian emergency medicine residents: a multicenter analysis of more than 6,000 endotracheal intubation attempts. *Annals of emergency medicine* 2005;46:328-36 doi: 10.1016/j.annemergmed.2005.01.009.
9. Graham CA, Beard D, Henry JM, et al. Rapid sequence intubation of trauma patients in Scotland. *The Journal of trauma* 2004;56:1123-6 doi:

- 1  
2  
3 10.1097/01.TA.0000109066.62811.8A.  
4  
5  
6 10. Hasegawa K, Hagiwara Y, Chiba T, et al. Emergency airway management in Japan:  
7  
8 Interim analysis of a multi-center prospective observational study. Resuscitation  
9  
10 2012;83:428-33 doi: 10.1016/j.resuscitation.2011.11.027.  
11  
12  
13 11. Hasegawa K, Shigemitsu K, Hagiwara Y, et al. Association between repeated intubation  
14  
15 attempts and adverse events in emergency departments: an analysis of a multicenter  
16  
17 prospective observational study. Annals of emergency medicine 2012;60:749-54 e2 doi:  
18  
19 10.1016/j.annemergmed.2012.04.005.  
20  
21  
22 12. Imamura T, Brown CA, 3rd, Ofuchi H, et al. Emergency airway management in geriatric  
23  
24 and younger patients: analysis of a multicenter prospective observational study. The  
25  
26 American journal of emergency medicine 2013;31:190-6 doi:  
27  
28 10.1016/j.ajem.2012.07.008.  
29  
30  
31 13. Hasegawa K, Hagiwara Y, Imamura T, et al. Increased incidence of hypotension in  
32  
33 elderly patients who underwent emergency airway management: an analysis of a  
34  
35 multi-centre prospective observational study. International journal of emergency  
36  
37 medicine 2013;6:12 doi: 10.1186/1865-1380-6-12.  
38  
39  
40  
41 14. Graham CA, Beard D, Oglesby AJ, et al. Rapid sequence intubation in Scottish urban  
42  
43 emergency departments. Emergency medicine journal : EMJ 2003;20:3-5  
44  
45  
46 15. Reed MJ, Dunn MJ, McKeown DW. Can an airway assessment score predict difficulty at  
47  
48 intubation in the emergency department? Emergency medicine journal : EMJ  
49  
50 2005;22:99-102 doi: 10.1136/emj.2003.008771.  
51  
52  
53 16. Soyuncu S, Eken C, Cete Y, et al. Determination of difficult intubation in the ED. The  
54  
55 American journal of emergency medicine 2009;27:905-10 doi:  
56  
57  
58  
59  
60

1  
2  
3  
4  
5  
6  
7  
8  
9  
10  
11  
12  
13  
14  
15  
16  
17  
18  
19  
20  
21  
22  
23  
24  
25  
26  
27  
28  
29  
30  
31  
32  
33  
34  
35  
36  
37  
38  
39  
40  
41  
42  
43  
44  
45  
46  
47  
48  
49  
50  
51  
52  
53  
54  
55  
56  
57  
58  
59  
60

10.1016/j.ajem.2008.07.003.

For peer review only

1  
2  
3 **Trauma airway management in emergency departments: A multicenter, prospective,**  
4 **observational study in Japan**  
5  
6  
7  
8  
9

10 Shunichiro Nakao, MD<sup>1</sup>; Akio Kimura, MD, PhD<sup>1</sup>; Yusuke Hagiwara, MD, MPH<sup>2</sup>; and Kohei  
11 Hasegawa, MD, MPH<sup>3</sup>, on behalf of the Japanese Emergency Medicine Network Investigators  
12  
13  
14  
15  
16

17 <sup>1</sup>Department of Emergency Medicine and Critical Care, National Center for Global Health and  
18 Medicine, Shinjuku, Tokyo, Japan; <sup>2</sup>Department of Emergency Medicine, Tokyo Metropolitan  
19 Children's Medical Center, Fuchu, Tokyo, Japan; <sup>3</sup>Department of Emergency Medicine,  
20 Massachusetts General Hospital, Harvard Medical School, Boston, Massachusetts, the United  
21 States  
22  
23  
24  
25  
26  
27  
28  
29  
30  
31

32 **Address correspondence to:** Dr. Shunichiro Nakao  
33

34 Department of Emergency Medicine, University of Ottawa / The Ottawa Hospital - Civic  
35 Campus, 1053 Carling Ave, Room F653, Ottawa, ON K1Y 4E9  
36  
37

38 Tel: 613.798.5555 ext. 15976  
39

40 Email: shunichiro-nakao@umin.ac.jp  
41  
42  
43  
44  
45

46 **Co-authors' address**  
47

48 Akio Kimura, MD, PhD; 1-21-1, Toyama, Shinjuku, Tokyo, Japan, Tel: + 81332027181, Email:  
49

50 akimura@hosp.ncgm.go.jp  
51  
52

53 Yusuke Hagiwara, MD, MPH; 304 Keyaki-ryo, 2-9-2 Musashidai, Fuchu, Tokyo, Japan, Tel:  
54

55 +810423005111, Email: yusukehagiwara-tky@umin.ac.jp  
56  
57  
58  
59  
60



1  
2  
3 Kohei Hasegawa, MD, MPH; 326 Cambridge Street, Suite 410, Boston, Tel: 6177245276, Email:  
4  
5 khasegawa1@partners.org  
6  
7  
8  
9  
10  
11

12 **Financial Disclosure:** This study was supported by a grant from St. Luke's Life Science Institute  
13 and a grant from Massachusetts General Hospital and Brigham and Women's Hospital. The study  
14 sponsors have no involvement in designing the study, in the collection, analysis and  
15 interpretation of data, in the writing of the manuscript, and in the decision to submit the  
16 manuscript for publication.  
17  
18  
19  
20  
21  
22  
23  
24  
25  
26

27 **Conflict of Interest:** None of the authors have any conflict of interest to declare.  
28  
29  
30  
31

32 **Keywords:** Airway management, intubation, emergency department, practice variation, rapid  
33 sequence intubation  
34  
35  
36  
37  
38

39 **Word Count: 2045**  
40  
41  
42  
43  
44  
45  
46  
47  
48  
49  
50  
51  
52  
53  
54  
55  
56  
57  
58  
59  
60

## Abstract

Objectives: Although successful airway management is essential for emergency trauma care, comprehensive studies are limited. We sought to characterize the current trauma care practice of airway management in the emergency departments (EDs) in Japan.

Design: Analysis of data from a prospective, observational, multi-center registry – the Japanese Emergency Airway Network (JEAN) registry.

Setting: 13 academic and community EDs from different geographic regions across Japan.

Participants: 723 trauma patients who underwent emergency intubation from March 2010 through August 2012.

Outcome measures: ED characteristics, patient and operator demographics, methods of airway management, intubation success or failure at each attempt, and adverse events.

Results: A total of 723 trauma patients who underwent emergency intubation were eligible for the analysis. Traumatic cardiac arrest comprised 32.6% (95% CI, 29.3%-36.1%) of patients.

Rapid sequence intubation (RSI) was the initial method chosen in 23.9% (95% CI, 21.0%-27.2%) of all trauma patients, and in 35.5% (95% CI, 31.4%-39.9%) of non-cardiac arrest trauma patients. Overall, intubation was successful in  $\leq 3$  attempts in 96.0% of patients (95% CI, 94.3%-97.2%). There was a wide variation in the initial methods of intubation; RSI as the initial method was performed in 0% to 50.9% of all trauma patients among 12 EDs. Similarly, there was a wide variation in success rates and adverse event rates across the EDs. Success rates varied between 35.5% and 90.5% at the first attempt and 85.1% and 100% within 3 attempts across the 12 EDs.

1  
2  
3  
4  
5  
6 Conclusion: In this multicenter prospective study in Japan, we observed a high overall success  
7  
8 rate in airway management during trauma care. However, the methods of intubation and success  
9  
10 rates were highly variable among hospitals.  
11  
12  
13  
14  
15  
16  
17  
18  
19  
20  
21  
22  
23  
24  
25  
26  
27  
28  
29  
30  
31  
32  
33  
34  
35  
36  
37  
38  
39  
40  
41  
42  
43  
44  
45  
46  
47  
48  
49  
50  
51  
52  
53  
54  
55  
56  
57  
58  
59  
60

For peer review only

## Article summary

### Article focus

This paper characterizes the current practice of airway management for trauma patients in emergency departments (EDs) in Japan by using data from the Japanese Emergency Airway Network (JEAN) Study.

### Key messages

The method of intubation, success rates, and adverse event rates **are** highly variable among EDs. Development and dissemination of nationwide protocols are warranted to achieve safer airway management for trauma victims in Japan.

### Strengths and limitations of this study

This is the first **study** to report disparities in trauma airway management based on multicenter, prospective data.

**Passive** surveillance of data is subject to self-reporting bias, leading to a possible underestimation of failed intubations and adverse events.

## 1. INTRODUCTION

Successful airway management is a cornerstone in the modern practice of emergency and trauma care. Failure of emergency airway management is often associated with morbidity and mortality in trauma patients. [1-3] Consequently, training in and understanding of airway management is a distinct discipline that is essential for successful trauma resuscitation.

Evidence-based recommendations for airway management during trauma care exist within international and national guidelines of the United States. These guidelines indicate rapid sequence intubation (RSI) as the initial method of emergency airway management in most trauma patients. [1 4 5] Recent studies reported that RSI is the most common airway management method in emergency departments (EDs) in North America and Europe. [6-9] Despite the ubiquitous practice of emergency airway management in trauma patients, little is known about its current practice and performance in other industrialized nations. Therefore, we sought to describe the current practice of airway management for trauma patients in the EDs in Japan.

## 2. METHODS

### Study Design and Setting

We analyzed the data of a prospective, observational, multi-center registry, the Japanese Emergency Airway Network (JEAN) registry. The study design, setting, methods of measurement, and measured variables have been reported elsewhere. [10-13] Briefly, the registry is a consortium of 13 academic and community EDs from different geographic regions across Japan. **These EDs consisted of 10 tertiary medical centers that have a capability to manage the most severe trauma patients and 3 secondary medical centers that are designated to treat moderately severe trauma patients.** The participating EDs had a median ED census of 30,000 patient visits per year (range 9,000 to 67,000). All 13 EDs were staffed by attending emergency physicians, and 12 had affiliations with emergency medicine residency training programs. Each hospital maintained individual protocols, policies, and procedures for emergency airway management. Intubations were performed by attending physicians or by resident physicians at the discretion of the ED attending physician. The ethics committee of each participating center approved the protocol, with waiver of informed consent before data collection.

### Patients

The registry prospectively collected information on consecutive patients who underwent airway management in the participating EDs during a 30-month period, from March 2010 to August 2012. All adult and pediatric trauma patients who underwent intubation were eligible for this analysis. We excluded an ED in which the number of trauma intubations was less than 10 from

1  
2  
3 the current analysis.  
4  
5  
6  
7

## 8 **Data Collection**

9

10 Data collection was passive, relying on self-reports by the intubators on duty. After each  
11 intubation, the intubators completed a standardized data sheet, including the patient's age, sex,  
12 estimated weight, primary indication for intubation, methods used to facilitate intubation,  
13 intubator's level of training **(emergency physicians, resident physicians, and transitional year**  
14 **residents)** and specialty **(emergency physician or not)**, number of attempts, success or failure,  
15 and intubation-related adverse events. Method was defined as the set of medications and devices  
16 used, such as RSI with a Macintosh laryngoscope. **Transitional-years residents were**  
17 **post-graduate year 1-2 physicians who rotate through the ED.** An intubation attempt was  
18 defined as a single insertion of the laryngoscope (or other device) past the teeth [2 10-13]. For  
19 nasal intubations, an attempt was defined as a single insertion of a tracheal tube past the  
20 turbinates. An attempt was successful if it resulted in the tracheal tube being passed through the  
21 vocal cords. One or more methods could be used in each patient, and each method could be  
22 attempted several times.  
23  
24  
25  
26  
27  
28  
29  
30  
31  
32  
33  
34  
35  
36  
37  
38  
39  
40  
41  
42

43 Adverse events were recorded using a pre-specified list, with the option to include additional  
44 comments, if necessary. We monitored compliance with data form completion by reviewing  
45 professional billing records. Where the data collection form was missing, the intubator was  
46 interviewed by one of the investigators within 2 weeks of the patient encounter, to fill out the  
47 data form.  
48  
49  
50  
51  
52  
53  
54  
55  
56  
57  
58  
59  
60

1  
2  
3 The outcomes of interest were the primary indication for intubation, initial method used for  
4  
5 intubation, intubation success rates (on the first attempt and within three attempts), and adverse  
6  
7 event rates.  
8  
9

### 10 11 12 **Statistical Analysis**

13  
14 We performed all analysis with JMP 10 software (SAS Institute Inc., Cary, NC, USA). At the  
15  
16 patient-level, we described patient demographics, the primary indication for intubation, initial  
17  
18 method of intubation, success rates, and adverse event rates as proportions with 95% confidence  
19  
20 intervals (CIs) and medians with interquartile ranges (IQR). Then, at the ED-level, we described  
21  
22 medians, IQR and ranges for each outcome for all trauma patients. We also repeated the analysis  
23  
24 after stratifying **by indication (non-cardiac arrest vs. cardiac arrest) and specialty**  
25  
26 **(emergency physicians vs. non-emergency physicians)**. All *P*-values were two-tailed, with  
27  
28  
29  
30  
31 *P*<0.05 considered statistically significant.  
32  
33  
34  
35  
36  
37  
38  
39  
40  
41  
42  
43  
44  
45  
46  
47  
48  
49  
50  
51  
52  
53  
54  
55  
56  
57  
58  
59  
60



### 3. RESULTS

During the 30-month study period, 4,268 patients required emergency airway management. Of these, the registry recorded 4,094 intubations (capture rate, 95.9%; **Figure 1**), of which 3370 patients who underwent airway management for medical reasons were excluded from the analysis. One of the 13 hospitals, in whom only 1 trauma patient required airway intervention during the study period, was excluded because the number of intubations for trauma care was less than 10 during the study period. Hence, 723 trauma patients were eligible for analysis.

Emergency physicians, including emergency medicine residents, performed the first intubation attempts in 60.0% (95% CI, 56.4%-63.5%) of all trauma patients and 66.7% (95% CI, 62.4%-70.8%) of non-cardiac arrest patients. Transitional-year residents (postgraduate years 1 and 2) performed the first intubation attempts in 31.4% (95% CI, 28.1%-34.9%) of all trauma patients and 25.7% (95% CI, 22.0%-29.7%) of non-cardiac arrest patients.

**Table 1** shows the baseline characteristics and primary indications in patients who required trauma airway management. Median age was 56 years; two-thirds of the patients were male. Traumatic cardiac arrest was the reason for intubation in 32.6% (95% CI, 29.3%-36.1%) of all trauma patients, while head trauma accounted for 30.4% (95% CI, 27.2%-33.9%). **Table 2** shows the initial method of airway management in the trauma patients. RSI was the initial method chosen in 23.9% (95% CI, 21.0%-27.2%) of all trauma patients and 35.5% (95% CI, 31.4%-39.9%) of non-cardiac arrest patients. Cricothyrotomy was performed as the initial airway management strategy in 2.2% (95% CI, 1.4%-3.6%) of all trauma patients and 0.4% (95% CI, 0.1%-1.5%) of non-cardiac arrest patients.

**Table 1. Characteristics of the 723 trauma patients who required intubation**

| Patient characteristics               |      |               |
|---------------------------------------|------|---------------|
| Age (y), median, (IQR)                | 56   | (34 - 73)     |
| Male, % (95% CI)                      | 66.9 | (63.4 - 70.3) |
| Estimated weight (kg), median, (IQR)  | 60   | (50 - 70)     |
| Indication for intubation, % (95% CI) |      |               |
| Cardiac arrest                        | 32.6 | (29.3 - 36.1) |
| Head trauma                           | 30.4 | (27.2 - 33.9) |
| Shock                                 | 16.6 | (14.1 - 19.5) |
| Facial/Neck trauma                    | 8.4  | (6.6 - 10.7)  |
| Airway burn                           | 6.8  | (5.2 - 8.8)   |
| Others                                | 5.1  | (3.3 - 8.0)   |

Abbreviations: CI, confidence interval; IQR, interquartile range

**Table 2. Initial method of intubation**

|                             | All trauma patients |      |               | Non-cardiac arrest patients |      |               |
|-----------------------------|---------------------|------|---------------|-----------------------------|------|---------------|
|                             | n                   | %    | 95% CI        | n                           | %    | 95% CI        |
| Rapid sequence intubation   | 173                 | 23.9 | (21.0 - 27.2) | 173                         | 35.5 | (31.4 - 39.9) |
| Sedation without paralysis  | 153                 | 21.2 | (18.3 - 24.3) | 153                         | 31.4 | (27.5 - 35.7) |
| Paralytics without sedation | 19                  | 2.6  | (1.7 - 4.1)   | 19                          | 3.9  | (2.5 - 6.0)   |
| Oral without sedation       | 349                 | 48.3 | (44.6 - 52.0) | 127                         | 26.1 | (22.4 - 30.2) |
| Surgical                    | 16                  | 2.2  | (1.4 - 3.6)   | 2                           | 0.4  | (0.1 - 1.5)   |
| Nasal intubation            | 13                  | 1.8  | (1.1 - 3.1)   | 13                          | 2.7  | (1.6 - 4.5)   |
| Total                       | 723                 | 100  |               | 487                         | 100  |               |

Abbreviations: CI, confidence interval

**Table 3** summarizes the intubation success rates and adverse event rates. Overall, intubation was successful in the first attempt in 63.8% (95% CI, 60.2%-67.2%) and within 3 attempts in 96.0% (95% CI, 94.3%-97.2%) of all trauma patients. In non-cardiac arrest patients, intubation was successful in the first attempt in 60.2% (95% CI, 55.8%-64.4%) and within 3 attempts in 94.5% (95% CI, 92.1%-96.2%) of patients. In cardiac arrest patients, intubation was successful in the first attempt in 71.2% (95% CI, 65.1%-76.6%) and within 3 attempts in 99.2% (95% CI,

1  
2  
3 97.0%-99.8%) of the patients. **In the stratified analysis by the specialty (i.e., emergency**  
4  
5 **physicians [n=434] vs. non-emergency physicians [n=289]), emergency physicians had a**  
6  
7 **higher success at the first attempt (72.8 % vs. 50.2 %, p<0.001) compared to**  
8  
9 **non-emergency physicians.** Intubation-associated adverse event rates were 10.8% (95% CI,  
10  
11 8.7%-13.3%) in overall trauma patients, 11.5% (95% CI, 9.0%-14.6%) in non-cardiac arrest  
12  
13 patients, and 9.3% (95% CI, 6.2%-13.7%) in cardiac arrest patients.  
14  
15  
16  
17  
18  
19

20 At the ED-level, there was a wide variation in the methods of intubation across the 12 EDs  
21  
22 **(Figure 2).** For example, RSI as the initial intubation method was performed in 0% to 50.9% of  
23  
24 all trauma patients, and in 0% to 87.5% of non-cardiac arrest patients. Similarly, there was a  
25  
26 wide variation in the success rates and adverse event rates across the EDs **(Figure 3).** The range  
27  
28 of overall success rates for intubation in the first attempt ranged from 35.5% to 90.5%, and from  
29  
30 85.1% to 100% within 3 attempts. Likewise, overall adverse event rates varied widely (range,  
31  
32 0%-16.7%) across the EDs. These wide variations in intubation success rates and adverse event  
33  
34 rates persisted across the non-cardiac arrest and cardiac arrest strata.  
35  
36  
37  
38  
39  
40  
41  
42  
43  
44  
45  
46  
47  
48  
49  
50  
51  
52  
53  
54  
55  
56  
57  
58  
59  
60

**Table 3. Success rates and intubation-associated adverse events**

|                              | All trauma patients |      |               | Non-cardiac arrest patients |      |               | Cardiac arrest patients |      |               |
|------------------------------|---------------------|------|---------------|-----------------------------|------|---------------|-------------------------|------|---------------|
|                              | n                   | %    | 95% CI        | n                           | %    | 95% CI        | n                       | %    | 95% CI        |
| Successful in 1st attempt    | 461                 | 63.8 | (60.2 - 67.2) | 293                         | 60.2 | (55.8 - 64.4) | 168                     | 71.2 | (65.1 - 76.6) |
| Successful in ≤ 3rd attempts | 694                 | 96.0 | (94.3 - 97.2) | 460                         | 94.5 | (92.1 - 96.2) | 234                     | 99.2 | (97.0 - 99.8) |
| Adverse events               | 78                  | 10.8 | (8.7 - 13.3)  | 56                          | 11.5 | (9.0 - 14.6)  | 22                      | 9.3  | (6.2 - 13.7)  |
| Details of adverse events*   |                     |      |               |                             |      |               |                         |      |               |
| Esophageal intubation        | 25                  | 3.5  | (2.2 - 5.1)   | 15                          | 3.1  | (1.7 - 5.0)   | 10                      | 4.2  | (2.0 - 7.7)   |
| Mainstem bronchus intubation | 18                  | 2.5  | (1.5 - 3.9)   | 9                           | 1.8  | (0.8 - 3.5)   | 9                       | 3.8  | (1.7 - 7.1)   |
| Airway trauma                | 17                  | 2.4  | (1.4 - 3.7)   | 14                          | 2.9  | (1.6 - 4.8)   | 3                       | 1.3  | (0.3 - 3.7)   |
| Hypotension†                 | 8                   | 1.1  | (0.5 - 2.2)   | 8                           | 1.6  | (0.7 - 3.2)   |                         |      |               |
| Vomiting                     | 6                   | 0.8  | (0.3 - 1.8)   | 6                           | 1.2  | (0.5 - 2.7)   |                         |      |               |
| Hypoxia‡                     | 3                   | 0.4  | (0.1 - 1.2)   | 3                           | 0.6  | (0.1 - 1.8)   |                         |      |               |
| Cardiac arrest               | 1                   | 0.1  | (0.0 - 0.8)   | 1                           | 0.2  | (0.0 - 1.1)   |                         |      |               |

Abbreviations: CI, confidence interval

\*Patients may have more than 1 adverse event.

†Hypotension was defined as systolic blood pressure less than 90 mm Hg.

‡Hypoxia was defined as pulse oximetric oxygen saturation of less than 90% during intubation attempts, not as a result of esophageal intubation.

#### 4. DISCUSSION

In this prospective, multicenter, observational study in Japan, we observed an acceptable success rate of airway management in trauma patients in EDs. However, we also found a wide range of variation in the initial method of intubation, success rates, and adverse event rates during trauma airway management across the EDs. Indeed, the overall success rates in the first intubation attempt ranged from 35.5% to 90.5%.

We were struck by the high degree of variation in the methods of airway management in trauma cases across the 12 EDs. The reasons for the observed practice variations are unclear and are likely multifactorial. It is possible that non-RSI methods were attempted in patients who were predicted to have a difficult intubation. However, the difference in the patient population across the EDs cannot fully explain the observed three-fold difference in the use of RSI. Alternatively, it is also possible that non-RSI methods were more frequently used in certain EDs because of the physicians' preference, procedural experiences, training background, or differences in ED staffing and institutional policies.

Our study also demonstrated a high degree of variations in success and adverse event rates among the EDs. Particularly, the success rate at first attempts was highly variable. To the best of our knowledge, this is the first study to demonstrate such inter-hospital variations in success and adverse event rates in trauma airway management in different EDs. **The reasons for the variations among the EDs are likely multifactorial; the potential explanations include** inter-hospital differences in patient population, skills or education backgrounds of intubators,<sup>[14]</sup>

1  
2  
3 drug and device availability in the ED, or any combination of these factors. Alternatively, the  
4  
5 observed wide variation in the intubation method may have led to these variations in success and  
6  
7 adverse event rates. **Furthermore, there are no requirements for procedural credentials to**  
8  
9 **perform ED intubations both in individuals and institutions in Japan. [10] This lack of**  
10  
11 **procedural requirements would have contributed, at least partially, to the observed**  
12  
13 **inter-hospital variations in the success rates.**  
14  
15  
16  
17  
18  
19

20 Although international and Japanese trauma care guidelines recommend the use of RSI as the  
21  
22 initial method of emergency airway management in most trauma patients, [1 4 5] the evidence  
23  
24 for accurately predicting patients in whom RSI should be avoided remain limited. [15 16] It is,  
25  
26 therefore, plausible that the scarcity of evidence may have contributed to the practice variations  
27  
28 across the EDs. Our observations should facilitate further investigation of any barriers to the  
29  
30 delivery of safer trauma care nationally. Additionally, building more robust evidence on trauma  
31  
32 airway management, coupled with improved dissemination of these findings, could decrease the  
33  
34 variations in trauma care across the EDs in Japan.  
35  
36  
37  
38  
39  
40

41 Our study has several potential limitations. First, this passive surveillance of the study data is  
42  
43 subject to self-reporting bias, leading to a possible underestimation of failed intubations and  
44  
45 adverse events. However, active independent monitoring of ED intubations is difficult to  
46  
47 accomplish. We did, however, use a self-reporting system with structured data forms, uniform  
48  
49 definitions, and a high capture rate. Second, we did not design this study to measure patient  
50  
51 outcomes, such as long-term mortality or morbidity. A more detailed analysis of adverse events  
52  
53 and outcomes requires following the patients for a longer period. Third, we did not account for  
54  
55  
56  
57  
58  
59  
60

1  
2  
3 several potential confounders, such as severities **(the Injury Severity Score, the Revised**  
4 **Trauma Score, etc.)** of cases and training levels of physicians. **However, this prospective**  
5 **multicenter data reflect the current airway management in the natural setting of a “real”**  
6 **population and current clinical practice, therefore enhancing the potential generalizability**  
7 **of the findings.** Finally, all EDs in this study were designated as tertiary or academic general  
8 hospitals, and all but one of the EDs were affiliated with an emergency medicine residency  
9 program in Japan. Therefore, our inferences may not be generalizable to trauma airway  
10 management in non-academic EDs or other developed nations. These observations, however, are  
11 highly relevant from a policy standpoint. As these EDs provide advanced care for trauma victims  
12 and train the majority of emergency physicians, these EDs have a disproportionate impact on  
13 current and future trauma care in EDs.  
14  
15  
16  
17  
18  
19  
20  
21  
22  
23  
24  
25  
26  
27  
28  
29  
30  
31

## 32 **5. CONCLUSION**

33  
34 In this multicenter prospective study of emergency airway management in Japan, we found an  
35 acceptable overall success rate in trauma airway management. However, we also found that the  
36 method of intubation, success rates and adverse event rates were highly variable among EDs.  
37  
38 **For researchers, our observations should facilitate further investigations to identify the**  
39 **reasons of the inter-hospital variations. Additionally, for policy makers and professional**  
40 **organizations,** our findings suggest that development and dissemination of nationwide protocols  
41 are warranted to achieve safer airway management for trauma victims in Japan.  
42  
43  
44  
45  
46  
47  
48  
49  
50  
51  
52  
53  
54  
55  
56  
57  
58  
59  
60

## Acknowledgments

The authors acknowledge the following research personnel at the study hospitals for their assistance with this project: Fukui University Hospital (Hideya Nagai, MD, Hiroshi Morita MD); Fukui Prefectural Hospital (Yukinori Kato, MD, Hidenori Higashi, MD); Japanese Red Cross Medical Center of Wakayama (Hiroshi Okamoto, MD); Kameda Medical Center (Kenzo Tanaka, MD); National Center for Global Health and Medicine (Taigo Sakamoto, MD, Shunichiro Nakao, MD); Nagoya Ekisaikai Hospital (Yukari Goto, MD); Niigata City General Hospital (Nobuhiro Sato, MD, MPH); Obama Municipal Hospital (Takuyo Chiba, MD); Okinawa Chubu Prefectural Hospital (Masashi Okubo, MD); Osaka Saiseikai Senri Hospital (Kazuaki Shigemitsu, MD); and Shonan Kamakura General Hospital (Taichi Imamura, MD).

Finally, we are grateful to our many emergency physicians and residents for their perseverance in pursuing new knowledge about this vital resuscitative procedure.

## Author Contribution

K.H. designed the study, for which S.N. and Y.H. contributed to the data collection and analysis.

S.N. wrote the manuscript, which A.K. reviewed.

## Data Sharing Statement

No additional data available



## References

1. American College of Surgeons CoT. *Advanced Trauma Life Support for Doctors, Student Course Manual*. 8th ed. Chicago, IL, 2008.
2. Walls RM, Brown CA, 3rd, Bair AE, et al. Emergency airway management: a multi-center report of 8937 emergency department intubations. *The Journal of emergency medicine* 2011;41:347-54 doi: 10.1016/j.jemermed.2010.02.024.
3. Hussain LM, Redmond AD. Are pre-hospital deaths from accidental injury preventable? *Bmj* 1994;308:1077-80 doi: 10.1136/bmj.308.6936.1077.
4. *Japan Advanced Trauma Evaluation and Care (JATEC™) guideline*. 3rd edition ed, 2008.
5. Dunham CM, Barraco RD, Clark DE, et al. Guidelines for emergency tracheal intubation immediately after traumatic injury. *The Journal of trauma* 2003;55:162-79 doi: 10.1097/01.ta.0000083335.93868.2c.
6. Graham CA. Emergency department airway management in the UK. *Journal of the Royal Society of Medicine* 2005;98:107-10 doi: 10.1258/jrsm.98.3.107.
7. Sakles JC, Laurin EG, Rantapaa AA, et al. Airway management in the emergency department: a one-year study of 610 tracheal intubations. *Annals of emergency medicine* 1998;31:325-32 doi: 10.1016/S0196-0644(98)70342-7.
8. Sagarin MJ, Barton ED, Chng YM, et al. Airway management by US and Canadian emergency medicine residents: a multicenter analysis of more than 6,000 endotracheal intubation attempts. *Annals of emergency medicine* 2005;46:328-36 doi: 10.1016/j.annemergmed.2005.01.009.
9. Graham CA, Beard D, Henry JM, et al. Rapid sequence intubation of trauma patients in Scotland. *The Journal of trauma* 2004;56:1123-6 doi:

- 1  
2  
3 10.1097/01.TA.0000109066.62811.8A.  
4  
5  
6 10. Hasegawa K, Hagiwara Y, Chiba T, et al. Emergency airway management in Japan:  
7  
8 Interim analysis of a multi-center prospective observational study. Resuscitation  
9  
10 2012;83:428-33 doi: 10.1016/j.resuscitation.2011.11.027.  
11  
12  
13 11. Hasegawa K, Shigemitsu K, Hagiwara Y, et al. Association between repeated intubation  
14  
15 attempts and adverse events in emergency departments: an analysis of a multicenter  
16  
17 prospective observational study. Annals of emergency medicine 2012;60:749-54 e2 doi:  
18  
19 10.1016/j.annemergmed.2012.04.005.  
20  
21  
22 12. Imamura T, Brown CA, 3rd, Ofuchi H, et al. Emergency airway management in geriatric  
23  
24 and younger patients: analysis of a multicenter prospective observational study. The  
25  
26 American journal of emergency medicine 2013;31:190-6 doi:  
27  
28 10.1016/j.ajem.2012.07.008.  
29  
30  
31 13. Hasegawa K, Hagiwara Y, Imamura T, et al. Increased incidence of hypotension in  
32  
33 elderly patients who underwent emergency airway management: an analysis of a  
34  
35 multi-centre prospective observational study. International journal of emergency  
36  
37 medicine 2013;6:12 doi: 10.1186/1865-1380-6-12.  
38  
39  
40  
41 14. **Graham CA, Beard D, Oglesby AJ, et al. Rapid sequence intubation in Scottish**  
42  
43 **urban emergency departments. Emergency medicine journal : EMJ 2003;20:3-5**  
44  
45  
46 15. Reed MJ, Dunn MJ, McKeown DW. Can an airway assessment score predict difficulty at  
47  
48 intubation in the emergency department? Emergency medicine journal : EMJ  
49  
50 2005;22:99-102 doi: 10.1136/emj.2003.008771.  
51  
52  
53 16. Soyuncu S, Eken C, Cete Y, et al. Determination of difficult intubation in the ED. The  
54  
55 American journal of emergency medicine 2009;27:905-10 doi:  
56  
57  
58  
59  
60

1  
2  
3  
4  
5  
6  
7  
8  
9  
10  
11  
12  
13  
14  
15  
16  
17  
18  
19  
20  
21  
22  
23  
24  
25  
26  
27  
28  
29  
30  
31  
32  
33  
34  
35  
36  
37  
38  
39  
40  
41  
42  
43  
44  
45  
46  
47  
48  
49  
50  
51  
52  
53  
54  
55  
56  
57  
58  
59  
60

10.1016/j.ajem.2008.07.003.

For peer review only

## Figure Legends

### Figure 1. Flow chart showing inclusion of patients in this study

### Figure 2. Inter-hospital variations in initial methods of intubation

Boxplots of inter-hospital variations in the initial methods of intubation. The line in the middle of the box represents the median, with the lower and upper limits of the box representing the 25th and 75th percentiles, respectively. The whiskers from the box extend to the minimum and maximum values.

### Figure 3. Inter-hospital variations in success rates and adverse event rates

Boxplots of inter-hospital variations in success rates and adverse event rates. The line in the middle of the box represents the median, with the lower and upper limits of the box representing the 25th and 75th percentiles. The whiskers from the box extend to the minimum and maximum values.

1  
2  
3  
4  
5  
6  
7  
8  
9  
10  
11  
12  
13  
14  
15  
16  
17  
18  
19  
20  
21  
22  
23  
24  
25  
26  
27  
28  
29  
30  
31  
32  
33  
34  
35  
36  
37  
38  
39  
40  
41  
42  
43  
44  
45  
46  
47  
48  
49  
50  
51  
52  
53  
54  
55  
56  
57  
58  
59  
60

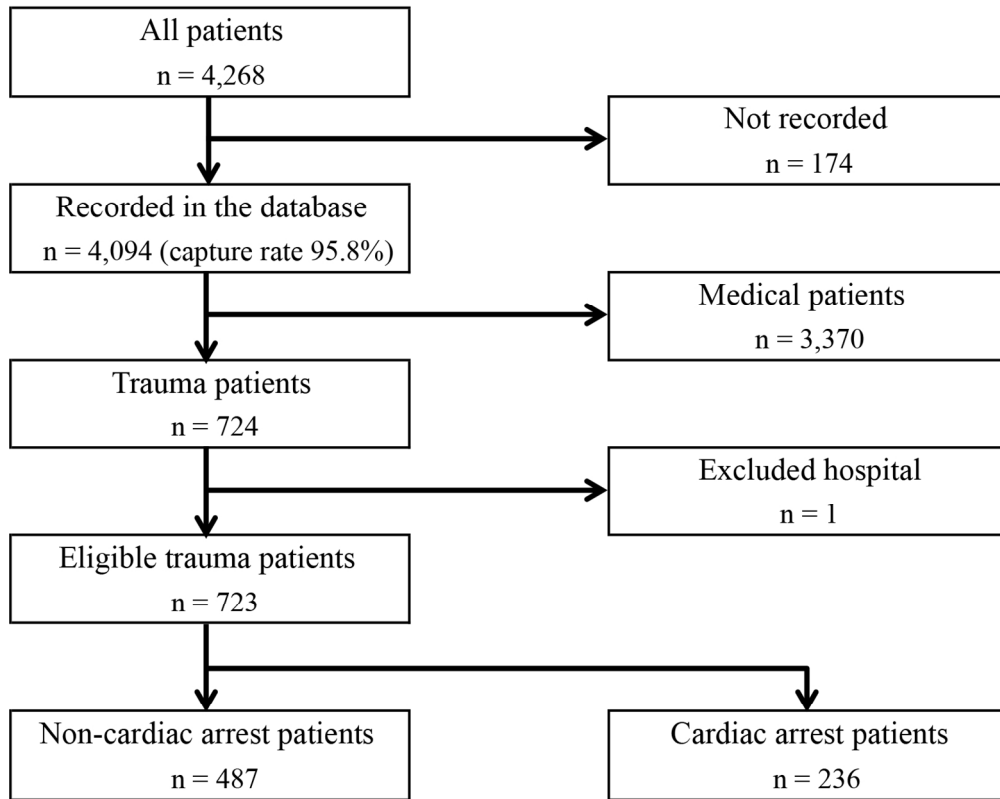

Flow chart showing inclusion of patients in this study

136x108mm (300 x 300 DPI)

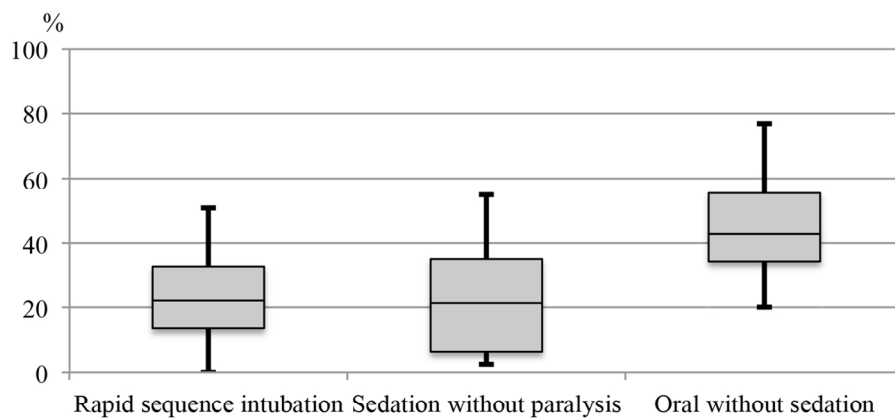

a. Among all trauma patients

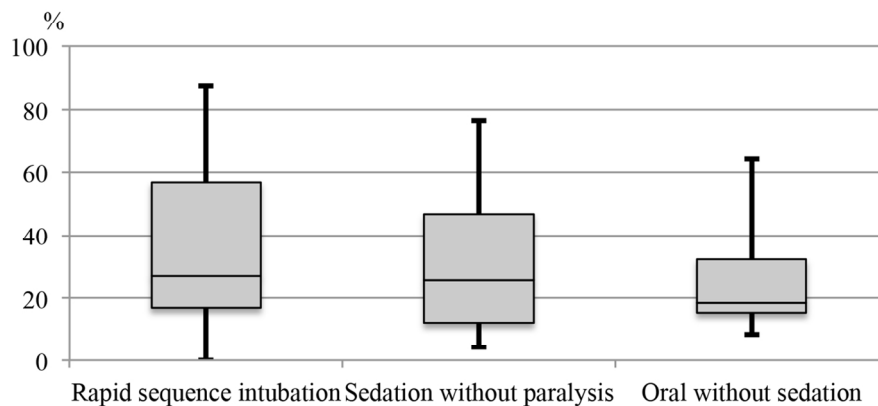

b. Among non-cardiac arrest patients

Inter-hospital variations in initial methods of intubation  
 Boxplots of inter-hospital variations in the initial methods of intubation. The line in the middle of the box represents the median, with the lower and upper limits of the box representing the 25th and 75th percentiles, respectively. The whiskers from the box extend to the minimum and maximum values.  
 140x165mm (300 x 300 DPI)

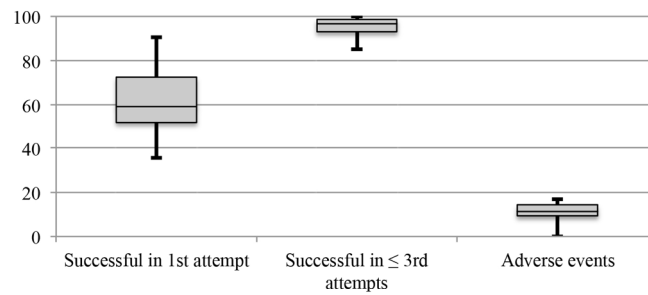

a. Among all trauma patients

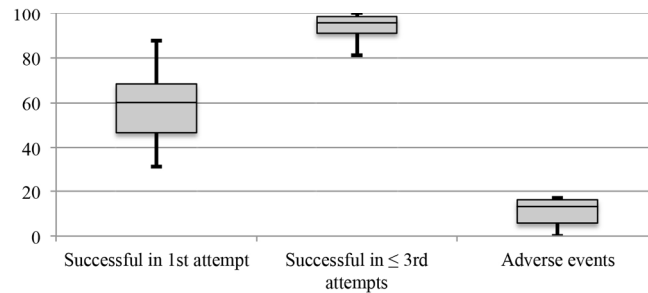

b. Among non-cardiac arrest patients

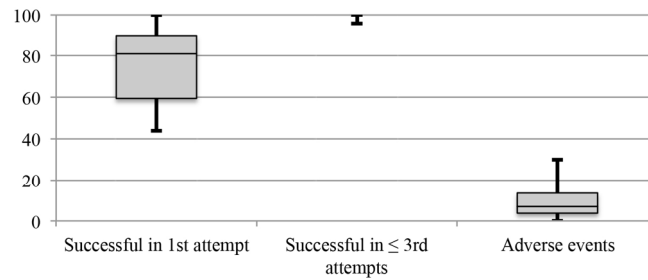

c. Among cardiac arrest patients

#### Inter-hospital variations in success rates and adverse event rates

Boxplots of inter-hospital variations in success rates and adverse event rates. The line in the middle of the box represents the median, with the lower and upper limits of the box representing the 25th and 75th percentiles. The whiskers from the box extend to the minimum and maximum values.

137x233mm (300 x 300 DPI)

# BMJ Open

## Trauma airway management in emergency departments: A multicenter, prospective, observational study in Japan

|                                 |                                                                                                                                                                                                                                                                                                                                                                                                                                                     |
|---------------------------------|-----------------------------------------------------------------------------------------------------------------------------------------------------------------------------------------------------------------------------------------------------------------------------------------------------------------------------------------------------------------------------------------------------------------------------------------------------|
| Journal:                        | <i>BMJ Open</i>                                                                                                                                                                                                                                                                                                                                                                                                                                     |
| Manuscript ID:                  | bmjopen-2014-006623.R2                                                                                                                                                                                                                                                                                                                                                                                                                              |
| Article Type:                   | Research                                                                                                                                                                                                                                                                                                                                                                                                                                            |
| Date Submitted by the Author:   | 05-Dec-2014                                                                                                                                                                                                                                                                                                                                                                                                                                         |
| Complete List of Authors:       | Nakao, Shunichiro; University of Ottawa / The Ottawa Hospital - Civic Campus, Department of Emergency Medicine<br>Kimura, Akio; National Center for Global Health and Medicine, Department of Emergency Medicine and Critical Care<br>Hagiwara, Yusuke; Tokyo Metropolitan Children's Medical Center, Department of Emergency Medicine<br>Hasegawa, Kohei; Massachusetts General Hospital, Harvard Medical School, Department of Emergency Medicine |
| <b>Primary Subject Heading</b>: | Emergency medicine                                                                                                                                                                                                                                                                                                                                                                                                                                  |
| Secondary Subject Heading:      | Medical management                                                                                                                                                                                                                                                                                                                                                                                                                                  |
| Keywords:                       | TRAUMA MANAGEMENT, ACCIDENT & EMERGENCY MEDICINE, MEDICAL EDUCATION & TRAINING                                                                                                                                                                                                                                                                                                                                                                      |
|                                 |                                                                                                                                                                                                                                                                                                                                                                                                                                                     |

SCHOLARONE™  
Manuscripts



1  
2  
3 **Trauma airway management in emergency departments: A multicenter, prospective,**  
4 **observational study in Japan**  
5  
6  
7  
8  
9

10 Shunichiro Nakao, MD<sup>1</sup>; Akio Kimura, MD, PhD<sup>1</sup>; Yusuke Hagiwara, MD, MPH<sup>2</sup>; and Kohei  
11 Hasegawa, MD, MPH<sup>3</sup>, on behalf of the Japanese Emergency Medicine Network Investigators  
12  
13  
14  
15

16  
17 <sup>1</sup>Department of Emergency Medicine and Critical Care, National Center for Global Health and  
18 Medicine, Shinjuku, Tokyo, Japan; <sup>2</sup>Department of Emergency Medicine, Tokyo Metropolitan  
19 Children's Medical Center, Fuchu, Tokyo, Japan; <sup>3</sup>Department of Emergency Medicine,  
20 Massachusetts General Hospital, Harvard Medical School, Boston, Massachusetts, the United  
21 States  
22  
23  
24  
25  
26  
27  
28  
29  
30  
31

32 **Address correspondence to:** Dr. Shunichiro Nakao  
33

34 Department of Emergency Medicine, University of Ottawa / The Ottawa Hospital - Civic  
35 Campus, 1053 Carling Ave, Room F653, Ottawa, ON K1Y 4E9  
36  
37

38 Tel: 613.798.5555 ext. 15976  
39

40 Email: shunichiro-nakao@umin.ac.jp  
41  
42  
43  
44  
45

46 **Co-authors' address**  
47

48 Akio Kimura, MD, PhD; 1-21-1, Toyama, Shinjuku, Tokyo, Japan, Tel: + 81332027181, Email:  
49

50 akimura@hosp.ncgm.go.jp  
51  
52

53 Yusuke Hagiwara, MD, MPH; 304 Keyaki-ryo, 2-9-2 Musashidai, Fuchu, Tokyo, Japan, Tel:  
54

55 +810423005111, Email: yusukehagiwara-ky@umin.ac.jp  
56  
57  
58  
59  
60

1  
2  
3 Kohei Hasegawa, MD, MPH; 326 Cambridge Street, Suite 410, Boston, Tel: 6177245276, Email:  
4  
5 khasegawa1@partners.org  
6  
7  
8  
9  
10  
11

12 **Financial Disclosure:** This study was supported by a grant from St. Luke's Life Science Institute  
13 and a grant from Massachusetts General Hospital and Brigham and Women's Hospital. The study  
14 sponsors have no involvement in designing the study, in the collection, analysis and  
15 interpretation of data, in the writing of the manuscript, and in the decision to submit the  
16 manuscript for publication.  
17  
18  
19  
20  
21  
22  
23  
24  
25  
26

27 **Conflict of Interest:** None of the authors have any conflict of interest to declare.  
28  
29  
30  
31

32 **Keywords:** Airway management, intubation, emergency department, practice variation, rapid  
33 sequence intubation  
34  
35  
36  
37  
38  
39  
40  
41  
42  
43  
44  
45  
46  
47  
48  
49  
50  
51  
52  
53  
54  
55  
56  
57  
58  
59  
60

**Abstract**

Objectives: Although successful airway management is essential for emergency trauma care, comprehensive studies are limited. We sought to characterize the current trauma care practice of airway management in the emergency departments (EDs) in Japan.

Design: Analysis of data from a prospective, observational, multi-center registry – the Japanese Emergency Airway Network (JEAN) registry.

Setting: 13 academic and community EDs from different geographic regions across Japan.

Participants: 723 trauma patients who underwent emergency intubation from March 2010 through August 2012.

Outcome measures: ED characteristics, patient and operator demographics, methods of airway management, intubation success or failure at each attempt, and adverse events.

Results: A total of 723 trauma patients who underwent emergency intubation were eligible for the analysis. Traumatic cardiac arrest comprised 32.6% (95% CI, 29.3%-36.1%) of patients. Rapid sequence intubation (RSI) was the initial method chosen in 23.9% (95% CI, 21.0%-27.2%) of all trauma patients, and in 35.5% (95% CI, 31.4%-39.9%) of non-cardiac arrest trauma patients. Overall, intubation was successful in  $\leq 3$  attempts in 96.0% of patients (95% CI, 94.3%-97.2%). There was a wide variation in the initial methods of intubation; RSI as the initial method was performed in 0% to 50.9% of all trauma patients among 12 EDs. Similarly, there was a wide variation in success rates and adverse event rates across the EDs. Success rates varied between 35.5% and 90.5% at the first attempt and 85.1% and 100% within 3 attempts across the 12 EDs.

1  
2  
3  
4  
5  
6 Conclusion: In this multicenter prospective study in Japan, we observed a high overall success  
7  
8 rate in airway management during trauma care. However, the methods of intubation and success  
9  
10 rates were highly variable among hospitals.  
11  
12  
13  
14  
15  
16  
17  
18  
19  
20  
21  
22  
23  
24  
25  
26  
27  
28  
29  
30  
31  
32  
33  
34  
35  
36  
37  
38  
39  
40  
41  
42  
43  
44  
45  
46  
47  
48  
49  
50  
51  
52  
53  
54  
55  
56  
57  
58  
59  
60

**Article summary****Article focus**

This paper characterizes the current practice of airway management for trauma patients in emergency departments (EDs) in Japan by using data from the Japanese Emergency Airway Network (JEAN) Study.

**Key messages**

The method of intubation, success rates, and adverse event rates are highly variable among EDs. Development and dissemination of nationwide protocols are warranted to achieve safer airway management for trauma victims in Japan.

**Strengths and limitations of this study**

This is the first study to report disparities in trauma airway management based on multicenter, prospective data.

Passive surveillance of data is subject to self-reporting bias, leading to a possible underestimation of failed intubations and adverse events.

## 1. INTRODUCTION

Successful airway management is a cornerstone in the modern practice of emergency and trauma care. Failure of emergency airway management is often associated with morbidity and mortality in trauma patients.[1-3] Consequently, training in and understanding of airway management is a distinct discipline that is essential for successful trauma resuscitation.

Evidence-based recommendations for airway management during trauma care exist within international and national guidelines of the United States. These guidelines indicate rapid sequence intubation (RSI) as the initial method of emergency airway management in most trauma patients.[1 4 5] Recent studies reported that RSI is the most common airway management method in emergency departments (EDs) in North America and Europe.[6-9] Despite the ubiquitous practice of emergency airway management in trauma patients, little is known about its current practice and performance in other industrialized nations. Therefore, we sought to describe the current practice of airway management for trauma patients in the EDs in Japan.

## 2. METHODS

### Study Design and Setting

We analyzed the data of a prospective, observational, multi-center registry, the Japanese Emergency Airway Network (JEAN) registry. The study design, setting, methods of measurement, and measured variables have been reported elsewhere.[10-13] Briefly, the registry is a consortium of 13 academic and community EDs from different geographic regions across Japan. These EDs consisted of 10 tertiary medical centers that have a capability to manage the most severe trauma patients and 3 secondary medical centers that are designated to treat moderately severe trauma patients. The participating EDs had a median ED census of 30,000 patient visits per year (range 9,000 to 67,000). All 13 EDs were staffed by attending emergency physicians, and 12 had affiliations with emergency medicine residency training programs. Each hospital maintained individual protocols, policies, and procedures for emergency airway management. Intubations were performed by attending physicians or by resident physicians at the discretion of the ED attending physician. The ethics committee of each participating center approved the protocol, with waiver of informed consent before data collection.

### Patients

The registry prospectively collected information on consecutive patients who underwent airway management in the participating EDs during a 30-month period, from March 2010 to August 2012. All adult and pediatric trauma patients who underwent intubation were eligible for this analysis. We excluded an ED in which the number of trauma intubations was less than 10 from the current analysis.

## Data Collection

Data collection was passive, relying on self-reports by the intubators on duty. After each intubation, the intubators completed a standardized data sheet, including the patient's age, sex, estimated weight, primary indication for intubation, methods used to facilitate intubation, intubator's level of training (emergency physicians, resident physicians, and transitional year residents) and specialty (emergency physician or not), number of attempts, success or failure, and intubation-related adverse events. Method was defined as the set of medications and devices used, such as RSI with a Macintosh laryngoscope. Transitional-years residents were post-graduate year 1-2 physicians who rotate through the ED. An intubation attempt was defined as a single insertion of the laryngoscope (or other device) past the teeth.[2 10-13] For nasal intubations, an attempt was defined as a single insertion of a tracheal tube past the turbinates. An attempt was successful if it resulted in the tracheal tube being passed through the vocal cords. One or more methods could be used in each patient, and each method could be attempted several times.

Adverse events were recorded using a pre-specified list, with the option to include additional comments, if necessary. Adverse events were defined as cardiac arrest, hypotension, hypoxemia, dysrhythmia, vomiting, esophageal intubation, mainstem bronchial intubation, and airway trauma that are considered to be intubation-related.[11] Cardiac arrest included asystole, bradycardia, or dysrhythmia with nonmeasurable blood pressure and cardiopulmonary resuscitation during or after intubation. Hypotension was defined as systolic blood pressure less than 90 mm Hg. Hypoxemia was defined as pulse oximetric saturation less than 90% during an



1  
2  
3 intubation attempt, not a result of esophageal intubation. Preexisting hypotension or hypoxemia  
4  
5 before an intubation attempt were not counted as an adverse event. Esophageal intubation was  
6  
7 defined as misplacement of the endotracheal tube in the upper esophagus or hypopharynx, with a  
8  
9 lapse of time and desaturation (pulse oximetric saturation <90%) before the removal of the  
10  
11 misplaced tube. We monitored compliance with data form completion by reviewing professional  
12  
13 billing records. Where the data collection form was missing, the intubator was interviewed by  
14  
15 one of the investigators within 2 weeks of the patient encounter, to fill out the data form.  
16  
17  
18  
19

20  
21  
22 The outcomes of interest were the primary indication for intubation, initial method used for  
23  
24 intubation, intubation success rates (on the first attempt and within three attempts), and  
25  
26 intubation-related adverse event rates.  
27  
28  
29  
30  
31

### 32 **Statistical Analysis**

33  
34 We performed all analysis with JMP 10 software (SAS Institute Inc., Cary, NC, USA). At the  
35  
36 patient-level, we described patient demographics, the primary indication for intubation, initial  
37  
38 method of intubation, success rates, and adverse event rates as proportions with 95% confidence  
39  
40 intervals (CIs) and medians with interquartile ranges (IQR). Then, at the ED-level, we described  
41  
42 medians, IQR and ranges for each outcome for all trauma patients. We also repeated the analysis  
43  
44 after stratifying by indication (non-cardiac arrest vs. cardiac arrest) and specialty (emergency  
45  
46 physicians vs. non-emergency physicians). All *P*-values were two-tailed, with *P*<0.05 considered  
47  
48 statistically significant.  
49  
50  
51  
52  
53  
54  
55  
56  
57  
58  
59  
60

### 3. RESULTS

During the 30-month study period, 4,268 patients required emergency airway management. Of these, the registry recorded 4,094 intubations (capture rate, 95.9%; **Figure 1**), of which 3370 patients who underwent airway management for medical reasons were excluded from the analysis. One of the 13 hospitals, in whom only 1 trauma patient required airway intervention during the study period, was excluded because the number of intubations for trauma care was less than 10 during the study period. Hence, 723 trauma patients were eligible for analysis.

Emergency physicians, including emergency medicine residents, performed the first intubation attempts in 60.0% (95% CI, 56.4%-63.5%) of all trauma patients and 66.7% (95% CI, 62.4%-70.8%) of non-cardiac arrest patients. Transitional-year residents (postgraduate years 1 and 2) performed the first intubation attempts in 31.4% (95% CI, 28.1%-34.9%) of all trauma patients and 25.7% (95% CI, 22.0%-29.7%) of non-cardiac arrest patients.

**Table 1** shows the baseline characteristics and primary indications in patients who required trauma airway management. Median age was 56 years; two-thirds of the patients were male. Traumatic cardiac arrest was the reason for intubation in 32.6% (95% CI, 29.3%-36.1%) of all trauma patients, while head trauma accounted for 30.4% (95% CI, 27.2%-33.9%). **Table 2** shows the initial method of airway management in the trauma patients. RSI was the initial method chosen in 23.9% (95% CI, 21.0%-27.2%) of all trauma patients and 35.5% (95% CI, 31.4%-39.9%) of non-cardiac arrest patients. Cricothyrotomy was performed as the initial airway management strategy in 2.2% (95% CI, 1.4%-3.6%) of all trauma patients and 0.4% (95% CI, 0.1%-1.5%) of non-cardiac arrest patients. The direct laryngoscope was used in most of intubations (n=654, 90.5%), and the remaining were intubated using a video laryngoscope (n=30,

4.1%), a bronchoscope (n=17, 2.4%), a lighted stylet (n=1, 0.1%) on the first attempt.

**Table 1. Characteristics of the 723 trauma patients who required intubation**

| Patient characteristics               |      |               |
|---------------------------------------|------|---------------|
| Age (y), median, (IQR)                | 56   | (34 - 73)     |
| Male, % (95% CI)                      | 66.9 | (63.4 - 70.3) |
| Estimated weight (kg), median, (IQR)  | 60   | (50 - 70)     |
| Indication for intubation, % (95% CI) |      |               |
| Cardiac arrest                        | 32.6 | (29.3 - 36.1) |
| Head trauma                           | 30.4 | (27.2 - 33.9) |
| Shock                                 | 16.6 | (14.1 - 19.5) |
| Facial/Neck trauma                    | 8.4  | (6.6 - 10.7)  |
| Airway burn                           | 6.8  | (5.2 - 8.8)   |
| Others                                | 5.1  | (3.3 - 8.0)   |

Abbreviations: CI, confidence interval; IQR, interquartile range

**Table 2. Initial method of intubation**

|                             | All trauma patients |      |               | Non-cardiac arrest patients |      |               |
|-----------------------------|---------------------|------|---------------|-----------------------------|------|---------------|
|                             | n                   | %    | 95% CI        | n                           | %    | 95% CI        |
| Rapid sequence intubation   | 173                 | 23.9 | (21.0 - 27.2) | 173                         | 35.5 | (31.4 - 39.9) |
| Sedation without paralysis  | 153                 | 21.2 | (18.3 - 24.3) | 153                         | 31.4 | (27.5 - 35.7) |
| Paralytics without sedation | 19                  | 2.6  | (1.7 - 4.1)   | 19                          | 3.9  | (2.5 - 6.0)   |
| Oral without sedation       | 349                 | 48.3 | (44.6 - 52.0) | 127                         | 26.1 | (22.4 - 30.2) |
| Surgical                    | 16                  | 2.2  | (1.4 - 3.6)   | 2                           | 0.4  | (0.1 - 1.5)   |
| Nasal intubation            | 13                  | 1.8  | (1.1 - 3.1)   | 13                          | 2.7  | (1.6 - 4.5)   |
| Total                       | 723                 | 100  |               | 487                         | 100  |               |

Abbreviations: CI, confidence interval

**Table 3** summarizes the intubation success rates and adverse event rates. Overall, intubation was successful in the first attempt in 63.8% (95% CI, 60.2%-67.2%) and within 3 attempts in 96.0% (95% CI, 94.3%-97.2%) of all trauma patients. In non-cardiac arrest patients, intubation was successful in the first attempt in 60.2% (95% CI, 55.8%-64.4%) and within 3 attempts in 94.5%

1  
2  
3 (95% CI, 92.1%-96.2%) of patients. In cardiac arrest patients, intubation was successful in the  
4 first attempt in 71.2% (95% CI, 65.1%-76.6%) and within 3 attempts in 99.2% (95% CI,  
5 97.0%-99.8%) of the patients. In the stratified analysis by the specialty (i.e., emergency  
6 physicians [n=434] vs. non-emergency physicians [n=289]), emergency physicians had a higher  
7 success at the first attempt (72.8 % vs. 50.2 %, p<0.001) compared to non-emergency physicians  
8 (including all transitional-year residents [n=237]). Intubation-associated adverse event rates were  
9 10.8% (95% CI, 8.7%-13.3%) in overall trauma patients, 11.5% (95% CI, 9.0%-14.6%) in  
10 non-cardiac arrest patients, and 9.3% (95% CI, 6.2%-13.7%) in cardiac arrest patients.  
11  
12  
13  
14  
15  
16  
17  
18  
19  
20  
21  
22  
23

24 At the ED-level, there was a wide variation in the methods of intubation across the 12 EDs  
25 (**Figure 2**). For example, RSI as the initial intubation method was performed in 0% to 50.9% of  
26 all trauma patients, and in 0% to 87.5% of non-cardiac arrest patients. Similarly, there was a  
27 wide variation in the success rates and adverse event rates across the EDs (**Figure 3**). The range  
28 of overall success rates for intubation in the first attempt ranged from 35.5% to 90.5%, and from  
29 85.1% to 100% within 3 attempts. Likewise, overall adverse event rates varied widely (range,  
30 0%-16.7%) across the EDs. These wide variations in intubation success rates and adverse event  
31 rates persisted across the non-cardiac arrest and cardiac arrest strata.  
32  
33  
34  
35  
36  
37  
38  
39  
40  
41  
42  
43  
44  
45  
46  
47  
48  
49  
50  
51  
52  
53  
54  
55  
56  
57  
58  
59  
60

**Table 3. Success rates and intubation-associated adverse events**

|                              | All trauma patients |      |               | Non-cardiac arrest patients |      |               | Cardiac arrest patients |      |               |
|------------------------------|---------------------|------|---------------|-----------------------------|------|---------------|-------------------------|------|---------------|
|                              | n                   | %    | 95% CI        | n                           | %    | 95% CI        | n                       | %    | 95% CI        |
| Successful in 1st attempt    | 461                 | 63.8 | (60.2 - 67.2) | 293                         | 60.2 | (55.8 - 64.4) | 168                     | 71.2 | (65.1 - 76.6) |
| Successful in ≤ 3rd attempts | 694                 | 96.0 | (94.3 - 97.2) | 460                         | 94.5 | (92.1 - 96.2) | 234                     | 99.2 | (97.0 - 99.8) |
| Adverse events               | 78                  | 10.8 | (8.7 - 13.3)  | 56                          | 11.5 | (9.0 - 14.6)  | 22                      | 9.3  | (6.2 - 13.7)  |
| Details of adverse events*   |                     |      |               |                             |      |               |                         |      |               |
| Esophageal intubation        | 25                  | 3.5  | (2.2 - 5.1)   | 15                          | 3.1  | (1.7 - 5.0)   | 10                      | 4.2  | (2.0 - 7.7)   |
| Mainstem bronchus intubation | 18                  | 2.5  | (1.5 - 3.9)   | 9                           | 1.8  | (0.8 - 3.5)   | 9                       | 3.8  | (1.7 - 7.1)   |
| Airway trauma                | 17                  | 2.4  | (1.4 - 3.7)   | 14                          | 2.9  | (1.6 - 4.8)   | 3                       | 1.3  | (0.3 - 3.7)   |
| Hypotension†                 | 8                   | 1.1  | (0.5 - 2.2)   | 8                           | 1.6  | (0.7 - 3.2)   |                         |      |               |
| Vomiting                     | 6                   | 0.8  | (0.3 - 1.8)   | 6                           | 1.2  | (0.5 - 2.7)   |                         |      |               |
| Hypoxia‡                     | 3                   | 0.4  | (0.1 - 1.2)   | 3                           | 0.6  | (0.1 - 1.8)   |                         |      |               |
| Cardiac arrest               | 1                   | 0.1  | (0.0 - 0.8)   | 1                           | 0.2  | (0.0 - 1.1)   |                         |      |               |

Abbreviations: CI, confidence interval

\*Patients may have more than 1 adverse event.

†Hypotension was defined as systolic blood pressure less than 90 mm Hg.

‡Hypoxia was defined as pulse oximetric oxygen saturation of less than 90% during intubation attempts, not as a result of esophageal intubation.

#### 4. DISCUSSION

In this prospective, multicenter, observational study in Japan, we observed an acceptable success rate of airway management in trauma patients in EDs. However, we also found a wide range of variation in the initial method of intubation, success rates, and adverse event rates during trauma airway management across the EDs. Indeed, the overall success rates in the first intubation attempt ranged from 35.5% to 90.5%.

We were struck by the high degree of variation in the methods of airway management in trauma cases across the 12 EDs. The reasons for the observed practice variations are unclear and are likely multifactorial. It is possible that non-RSI methods were attempted in patients who were predicted to have a difficult intubation. However, the difference in the patient population across the EDs cannot fully explain the observed three-fold difference in the use of RSI. Therefore, some of the patients might have been inappropriately considered as “difficult intubation,” and intubated with non-RSI methods. Alternatively, it is also plausible that non-RSI methods were more frequently used in certain EDs because of the physicians’ preference, procedural experiences, training background, or differences in ED staffing and institutional policies.

Our study also demonstrated a high degree of variations in success and adverse event rates among the EDs. Particularly, the success rate at first attempts was highly variable. To the best of our knowledge, this is the first study to demonstrate such inter-hospital variations in success and adverse event rates in trauma airway management in different EDs. The reasons for the variations among the EDs are likely multifactorial; the potential explanations include

1  
2  
3 inter-hospital differences in patient population, skills or education backgrounds of intubators,[14]  
4  
5 drug and device availability in the ED, or any combination of these factors. Alternatively, the  
6  
7  
8 observed wide variation in the intubation method may have led to these variations in success and  
9  
10 adverse event rates. Furthermore, there are no requirements for procedural credentials to perform  
11  
12 ED intubations both in individuals and institutions in Japan.[10] This lack of procedural  
13  
14 requirements would have contributed, at least partially, to the observed inter-hospital variations  
15  
16 in the success rates. Indeed, we observed that intubation success rates performed by  
17  
18 non-emergency physicians were significantly lower; this was, at least in part, explained by the  
19  
20 intubation attempts by transitional-year residents. However, it is well documented in the  
21  
22 literature that first-pass success is important in critically-ill patients[11]; therefore, the observed  
23  
24 lower success rate by these non-skilled physicians cannot be justified. Our data underscore the  
25  
26 reinforcement of Japanese methodology of training for non-skilled physicians (e.g., the use of  
27  
28 simulators and training in a more controlled setting[15-17] to improve their intubation skill set,  
29  
30 which will, in turn, improve patients' outcomes.  
31  
32  
33  
34  
35  
36  
37  
38

39 Although international and Japanese trauma care guidelines recommend the use of RSI as the  
40  
41 initial method of emergency airway management in most trauma patients,[14 5] the evidence for  
42  
43 accurately predicting patients in whom RSI should be avoided remain limited.[18 19] It is,  
44  
45 therefore, plausible that the scarcity of evidence may have contributed to the practice variations  
46  
47 across the EDs. Our observations should facilitate further investigation of any barriers to the  
48  
49 delivery of safer trauma care nationally. Additionally, building more robust evidence on trauma  
50  
51 airway management, coupled with improved dissemination of these findings, could decrease the  
52  
53 variations in trauma care across the EDs in Japan.  
54  
55  
56  
57  
58  
59  
60

1  
2  
3  
4  
5  
6 Our study has several potential limitations. First, this passive surveillance of the study data is  
7  
8 subject to self-reporting bias, leading to a possible underestimation of failed intubations and  
9  
10 adverse events. However, active independent monitoring of ED intubations is difficult to  
11  
12 accomplish. We did, however, use a self-reporting system with structured data forms, uniform  
13  
14 definitions, and a high capture rate. Second, we did not design this study to measure patient  
15  
16 outcomes, such as long-term mortality or morbidity. A more detailed analysis of adverse events  
17  
18 and outcomes requires following the patients for a longer period. Third, we did not account for  
19  
20 several potential confounders, such as severities (the Injury Severity Score, the Revised Trauma  
21  
22 Score, etc.) of cases and training levels of physicians. However, this prospective multicenter data  
23  
24 reflect the current airway management in the natural setting of a “real” population and current  
25  
26 clinical practice, therefore enhancing the potential generalizability of the findings. Finally, all  
27  
28 EDs in this study were designated as tertiary or academic general hospitals, and all but one of the  
29  
30 EDs were affiliated with an emergency medicine residency program in Japan. Therefore, our  
31  
32 inferences may not be generalizable to trauma airway management in non-academic EDs or other  
33  
34 developed nations. These observations, however, are highly relevant from a policy standpoint. As  
35  
36 these EDs provide advanced care for trauma victims and train the majority of emergency  
37  
38 physicians, these EDs have a disproportionate impact on current and future trauma care in EDs.  
39  
40  
41  
42  
43  
44  
45  
46  
47

## 48 **5. CONCLUSION**

49  
50 In this multicenter prospective study of emergency airway management in Japan, we found an  
51  
52 acceptable overall success rate in trauma airway management. However, we also found that the  
53  
54 method of intubation, success rates and adverse event rates were highly variable among EDs. For  
55  
56  
57  
58  
59  
60



1  
2  
3 researchers, our observations should facilitate further investigations to identify the reasons of the  
4  
5 inter-hospital variations. Additionally, for policy makers and professional organizations, our  
6  
7 findings suggest that development and dissemination of nationwide protocols are warranted to  
8  
9 achieve safer airway management for trauma victims in Japan.  
10  
11  
12  
13  
14  
15  
16  
17  
18  
19  
20  
21  
22  
23  
24  
25  
26  
27  
28  
29  
30  
31  
32  
33  
34  
35  
36  
37  
38  
39  
40  
41  
42  
43  
44  
45  
46  
47  
48  
49  
50  
51  
52  
53  
54  
55  
56  
57  
58  
59  
60

For peer review only

## Acknowledgments

The authors acknowledge the following research personnel at the study hospitals for their assistance with this project: Fukui University Hospital (Hideya Nagai, MD, Hiroshi Morita MD); Fukui Prefectural Hospital (Yukinori Kato, MD, Hidenori Higashi, MD); Japanese Red Cross Medical Center of Wakayama (Hiroshi Okamoto, MD); Kameda Medical Center (Kenzo Tanaka, MD); National Center for Global Health and Medicine (Taigo Sakamoto, MD, Shunichiro Nakao, MD); Nagoya Ekisaikai Hospital (Yukari Goto, MD); Niigata City General Hospital (Nobuhiro Sato, MD, MPH); Obama Municipal Hospital (Takuyo Chiba, MD); Okinawa Chubu Prefectural Hospital (Masashi Okubo, MD); Osaka Saiseikai Senri Hospital (Kazuaki Shigemitsu, MD); and Shonan Kamakura General Hospital (Taichi Imamura, MD).

Finally, we are grateful to our many emergency physicians and residents for their perseverance in pursuing new knowledge about this vital resuscitative procedure.

## Author Contribution

K.H. designed the study, for which S.N. and Y.H. contributed to the data collection and analysis.

S.N. wrote the manuscript, which A.K. reviewed.

## Data Sharing Statement

No additional data available

## References

1. American College of Surgeons CoT. *Advanced Trauma Life Support for Doctors, Student Course Manual*. 8th ed. Chicago, IL, 2008.
2. Walls RM, Brown CA, 3rd, Bair AE, et al. Emergency airway management: a multi-center report of 8937 emergency department intubations. *The Journal of emergency medicine* 2011;41:347-54 doi: 10.1016/j.jemermed.2010.02.024.
3. Hussain LM, Redmond AD. Are pre-hospital deaths from accidental injury preventable? *Bmj* 1994;308:1077-80 doi: 10.1136/bmj.308.6936.1077.
4. *Japan Advanced Trauma Evaluation and Care (JATEC™) guideline*. 3rd edition ed, 2008.
5. Dunham CM, Barraco RD, Clark DE, et al. Guidelines for emergency tracheal intubation immediately after traumatic injury. *The Journal of trauma* 2003;55:162-79 doi: 10.1097/01.ta.0000083335.93868.2c.
6. Graham CA. Emergency department airway management in the UK. *Journal of the Royal Society of Medicine* 2005;98:107-10 doi: 10.1258/jrsm.98.3.107.
7. Sakles JC, Laurin EG, Rantapaa AA, et al. Airway management in the emergency department: a one-year study of 610 tracheal intubations. *Annals of emergency medicine* 1998;31:325-32 doi: 10.1016/S0196-064470342-7.
8. Sagarin MJ, Barton ED, Chng YM, et al. Airway management by US and Canadian emergency medicine residents: a multicenter analysis of more than 6,000 endotracheal intubation attempts. *Annals of emergency medicine* 2005;46:328-36 doi: 10.1016/j.annemergmed.2005.01.009.
9. Graham CA, Beard D, Henry JM, et al. Rapid sequence intubation of trauma patients in Scotland. *The Journal of trauma* 2004;56:1123-6 doi:

- 1  
2  
3 10.1097/01.TA.0000109066.62811.8A.  
4  
5  
6 10. Hasegawa K, Hagiwara Y, Chiba T, et al. Emergency airway management in Japan:  
7  
8 Interim analysis of a multi-center prospective observational study. *Resuscitation*  
9  
10 2012;83:428-33 doi: 10.1016/j.resuscitation.2011.11.027.  
11  
12  
13 11. Hasegawa K, Shigemitsu K, Hagiwara Y, et al. Association between repeated intubation  
14  
15 attempts and adverse events in emergency departments: an analysis of a multicenter  
16  
17 prospective observational study. *Annals of emergency medicine* 2012;60:749-54 e2 doi:  
18  
19 10.1016/j.annemergmed.2012.04.005.  
20  
21  
22 12. Imamura T, Brown CA, 3rd, Ofuchi H, et al. Emergency airway management in geriatric  
23  
24 and younger patients: analysis of a multicenter prospective observational study. *The*  
25  
26 *American journal of emergency medicine* 2013;31:190-6 doi:  
27  
28 10.1016/j.ajem.2012.07.008.  
29  
30  
31 13. Hasegawa K, Hagiwara Y, Imamura T, et al. Increased incidence of hypotension in  
32  
33 elderly patients who underwent emergency airway management: an analysis of a  
34  
35 multi-centre prospective observational study. *International journal of emergency*  
36  
37 *medicine* 2013;6:12 doi: 10.1186/1865-1380-6-12.  
38  
39  
40  
41 14. Graham CA, Beard D, Oglesby AJ, et al. Rapid sequence intubation in Scottish urban  
42  
43 emergency departments. *Emergency medicine journal : EMJ* 2003;20:3-5  
44  
45  
46 15. Mayo PH, Hackney JE, Mueck JT, et al. Achieving house staff competence in  
47  
48 emergency airway management: results of a teaching program using a computerized  
49  
50 patient simulator. *Critical care medicine* 2004;32:2422-7  
51  
52  
53 16. Cook DA, Hatala R, Brydges R, et al. Technology-enhanced simulation for health  
54  
55 professions education: a systematic review and meta-analysis. *JAMA : the journal of the*  
56  
57  
58  
59  
60

American Medical Association 2011;306:978-88 doi: 10.1001/jama.2011.1234.

17. Bernhard M, Mohr S, Weigand MA, et al. Developing the skill of endotracheal intubation: implication for emergency medicine. *Acta anaesthesiologica Scandinavica* 2012;56:164-71 doi: 10.1111/j.1399-6576.2011.02547.x.
18. Reed MJ, Dunn MJ, McKeown DW. Can an airway assessment score predict difficulty at intubation in the emergency department? *Emergency medicine journal : EMJ* 2005;22:99-102 doi: 10.1136/emj.2003.008771.
19. Soyuncu S, Eken C, Cete Y, et al. Determination of difficult intubation in the ED. *The American journal of emergency medicine* 2009;27:905-10 doi: 10.1016/j.ajem.2008.07.003.

## Figure Legends

### Figure 1. Flow chart showing inclusion of patients in this study

### Figure 2. Inter-hospital variations in initial methods of intubation

Boxplots of inter-hospital variations in the initial methods of intubation. The line in the middle of the box represents the median, with the lower and upper limits of the box representing the 25th and 75th percentiles, respectively. The whiskers from the box extend to the minimum and maximum values.

### Figure 3. Inter-hospital variations in success rates and adverse event rates

Boxplots of inter-hospital variations in success rates and adverse event rates. The line in the middle of the box represents the median, with the lower and upper limits of the box representing the 25th and 75th percentiles. The whiskers from the box extend to the minimum and maximum values.

1  
2  
3  
4  
5  
6  
7  
8  
9  
10  
11  
12  
13  
14  
15  
16  
17  
18  
19  
20  
21  
22  
23  
24  
25  
26  
27  
28  
29  
30  
31  
32  
33  
34  
35  
36  
37  
38  
39  
40  
41  
42  
43  
44  
45  
46  
47  
48  
49  
50  
51  
52  
53  
54  
55  
56  
57  
58  
59  
60

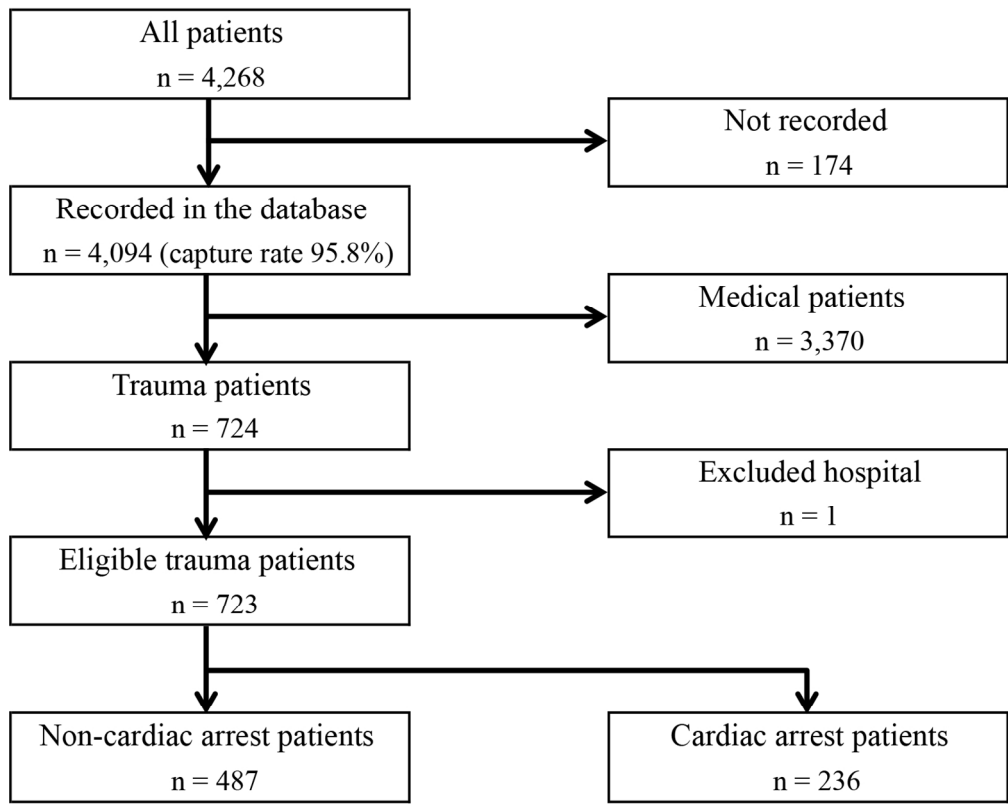

Flow chart showing inclusion of patients in this study

136x108mm (300 x 300 DPI)



a. Among all trauma patients



b. Among non-cardiac arrest patients

Inter-hospital variations in initial methods of intubation  
 Boxplots of inter-hospital variations in the initial methods of intubation. The line in the middle of the box represents the median, with the lower and upper limits of the box representing the 25th and 75th percentiles, respectively. The whiskers from the box extend to the minimum and maximum values.  
 140x165mm (300 x 300 DPI)



1  
2  
3  
4  
5  
6  
7  
8  
9  
10  
11  
12  
13  
14  
15  
16  
17  
18  
19  
20  
21  
22  
23  
24  
25  
26  
27  
28  
29  
30  
31  
32  
33  
34  
35  
36  
37  
38  
39  
40  
41  
42  
43  
44  
45  
46  
47  
48  
49  
50  
51  
52  
53  
54  
55  
56  
57  
58  
59  
60

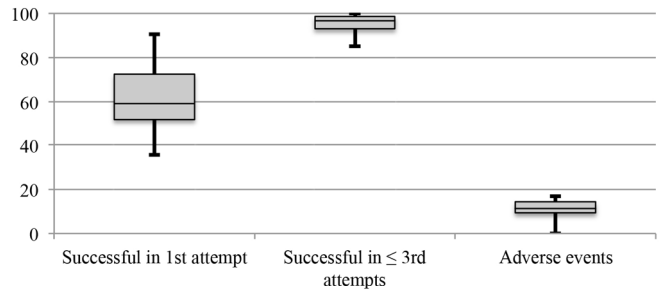

a. Among all trauma patients

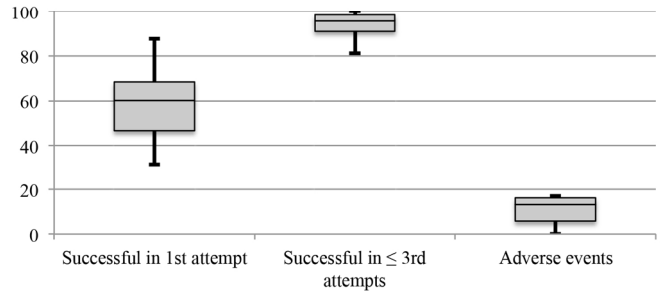

b. Among non-cardiac arrest patients

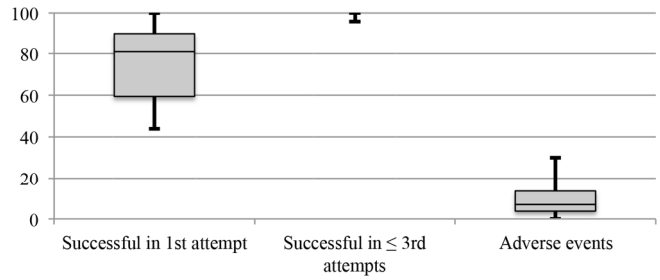

c. Among cardiac arrest patients

Inter-hospital variations in success rates and adverse event rates  
 Boxplots of inter-hospital variations in success rates and adverse event rates. The line in the middle of the box represents the median, with the lower and upper limits of the box representing the 25th and 75th percentiles. The whiskers from the box extend to the minimum and maximum values.  
 137x233mm (300 x 300 DPI)

1  
2  
3  
4  
5  
6  
7  
8  
9 **Trauma airway management in emergency departments: A multicenter, prospective,**  
10 **observational study in Japan**  
11

12  
13  
14 Shunichiro Nakao, MD<sup>1</sup>; Akio Kimura, MD, PhD<sup>1</sup>; Yusuke Hagiwara, MD, MPH<sup>2</sup>; and Kohei  
15 Hasegawa, MD, MPH<sup>3</sup>, on behalf of the Japanese Emergency Medicine Network Investigators  
16  
17  
18

19  
20 <sup>1</sup> Department of Emergency Medicine and Critical Care, National Center for Global Health and  
21 Medicine, Shinjuku, Tokyo, Japan; <sup>2</sup> Department of Emergency Medicine, Tokyo Metropolitan  
22 Children's Medical Center, Fuchu, Tokyo, Japan; <sup>3</sup> Department of Emergency Medicine,  
23 Massachusetts General Hospital, Harvard Medical School, Boston, Massachusetts, the United  
24 States  
25  
26  
27  
28  
29

30  
31 **Address correspondence to:** Dr. Shunichiro Nakao  
32

33 Department of Emergency Medicine, University of Ottawa / The Ottawa Hospital - Civic  
34 Campus, 1053 Carling Ave, Room F653, Ottawa, ON K1Y 4E9  
35

36  
37 Tel: 613.798.5555 ext. 15976  
38

39 Email: shunichiro-nakao@umin.ac.jp  
40  
41

42  
43 **Co-authors' address**  
44

45 Akio Kimura, MD, PhD; 1-21-1, Toyama, Shinjuku, Tokyo, Japan, Tel: + 81332027181, Email:  
46 akimura@hosp.ncgm.go.jp  
47

48 Yusuke Hagiwara, MD, MPH; 304 Keyaki-ryo, 2-9-2 Musashidai, Fuchu, Tokyo, Japan, Tel:  
49 +810423005111, Email: yusukehagiwara-ky@umin.ac.jp  
50  
51  
52

1  
2  
3  
4  
5  
6  
7  
8  
9  
10  
11  
12  
13  
14  
15  
16  
17  
18  
19  
20  
21  
22  
23  
24  
25  
26  
27  
28  
29  
30  
31  
32  
33  
34  
35  
36  
37  
38  
39  
40  
41  
42  
43  
44  
45  
46  
47  
48  
49  
50  
51  
52  
53  
54  
55  
56  
57  
58  
59  
60

Kohei Hasegawa, MD, MPH; 326 Cambridge Street, Suite 410, Boston, Tel: 6177245276, Email:  
khasegawa1@partners.org

**Financial Disclosure:** This study was supported by a grant from St. Luke's Life Science Institute and a grant from Massachusetts General Hospital and Brigham and Women's Hospital. The study sponsors have no involvement in designing the study, in the collection, analysis and interpretation of data, in the writing of the manuscript, and in the decision to submit the manuscript for publication.

**Conflict of Interest:** None of the authors have any conflict of interest to declare.

**Keywords:** Airway management, intubation, emergency department, practice variation, rapid sequence intubation

**Abstract**

Objectives: Although successful airway management is essential for emergency trauma care, comprehensive studies are limited. We sought to characterize the current trauma care practice of airway management in the emergency departments (EDs) in Japan.

Design: Analysis of data from a prospective, observational, multi-center registry – the Japanese Emergency Airway Network (JEAN) registry.

Setting: 13 academic and community EDs from different geographic regions across Japan.

Participants: 723 trauma patients who underwent emergency intubation from March 2010 through August 2012.

Outcome measures: ED characteristics, patient and operator demographics, methods of airway management, intubation success or failure at each attempt, and adverse events.

Results: A total of 723 trauma patients who underwent emergency intubation were eligible for the analysis. Traumatic cardiac arrest comprised 32.6% (95% CI, 29.3%-36.1%) of patients.

Rapid sequence intubation (RSI) was the initial method chosen in 23.9% (95% CI, 21.0%-27.2%) of all trauma patients, and in 35.5% (95% CI, 31.4%-39.9%) of non-cardiac arrest trauma patients. Overall, intubation was successful in  $\leq 3$  attempts in 96.0% of patients (95% CI, 94.3%-97.2%). There was a wide variation in the initial methods of intubation; RSI as the initial method was performed in 0% to 50.9% of all trauma patients among 12 EDs. Similarly, there was a wide variation in success rates and adverse event rates across the EDs. Success rates varied between 35.5% and 90.5% at the first attempt and 85.1% and 100% within 3 attempts across the 12 EDs.

1  
2  
3  
4  
5  
6  
7  
8  
9  
10  
11  
12  
13  
14  
15  
16  
17  
18  
19  
20  
21  
22  
23  
24  
25  
26  
27  
28  
29  
30  
31  
32  
33  
34  
35  
36  
37  
38  
39  
40  
41  
42  
43  
44  
45  
46  
47  
48  
49  
50  
51  
52  
53  
54  
55  
56  
57  
58  
59  
60

Conclusion: In this multicenter prospective study in Japan, we observed a high overall success rate in airway management during trauma care. However, the methods of intubation and success rates were highly variable among hospitals.

For peer review only

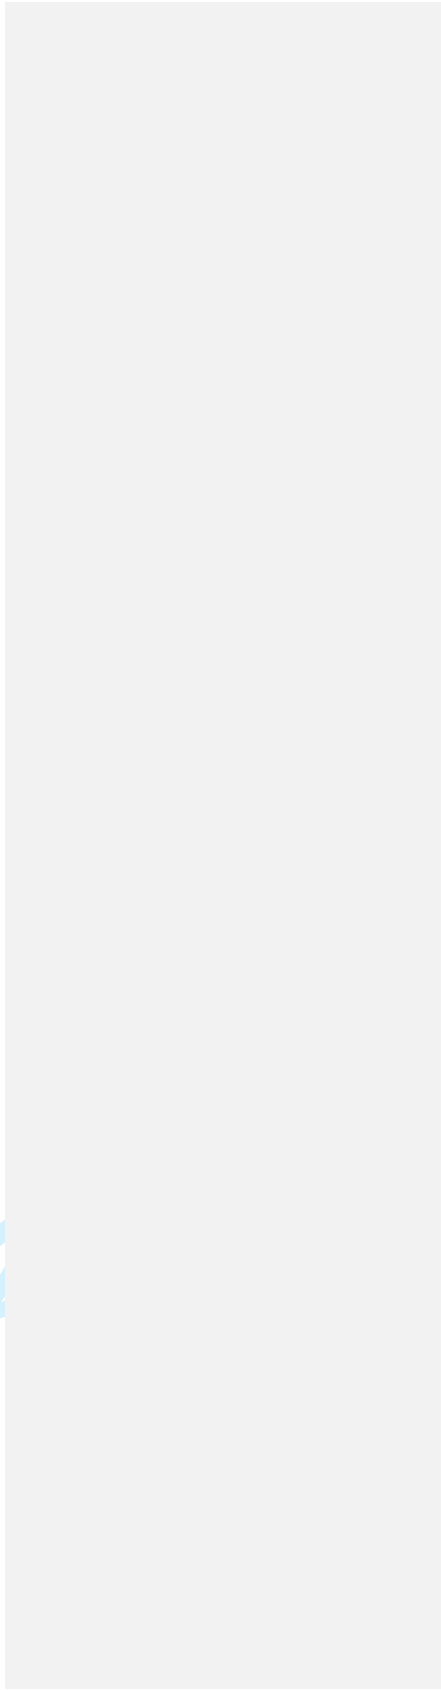

1  
2  
3  
4  
5  
6  
7  
8  
9  
10 **Article summary**

11 **Article focus**

12 This paper characterizes the current practice of airway management for trauma patients in  
13 emergency departments (EDs) in Japan by using data from the Japanese Emergency Airway  
14 Network (JEAN) Study.  
15  
16  
17

18 **Key messages**

19 The method of intubation, success rates, and adverse event rates are highly variable among EDs.  
20  
21 Development and dissemination of nationwide protocols are warranted to achieve safer airway  
22 management for trauma victims in Japan.  
23  
24  
25

26 **Strengths and limitations of this study**

27 This is the first study to report disparities in trauma airway management based on multicenter,  
28 prospective data.  
29  
30 Passive surveillance of data is subject to self-reporting bias, leading to a possible  
31 underestimation of failed intubations and adverse events.  
32  
33  
34  
35  
36  
37  
38  
39  
40  
41  
42  
43  
44  
45  
46  
47  
48  
49  
50  
51  
52  
53  
54

1  
2  
3  
4  
5  
6  
7  
8  
9  
10  
11  
12  
13  
14  
15  
16  
17  
18  
19  
20  
21  
22  
23  
24  
25  
26  
27  
28  
29  
30  
31  
32  
33  
34  
35  
36  
37  
38  
39  
40  
41  
42  
43  
44  
45  
46  
47  
48  
49  
50  
51  
52  
53  
54  
55  
56  
57  
58  
59  
60

## 1. INTRODUCTION

Successful airway management is a cornerstone in the modern practice of emergency and trauma care. Failure of emergency airway management is often associated with morbidity and mortality in trauma patients.[1-3] Consequently, training in and understanding of airway management is a distinct discipline that is essential for successful trauma resuscitation.

Evidence-based recommendations for airway management during trauma care exist within international and national guidelines of the United States. These guidelines indicate rapid sequence intubation (RSI) as the initial method of emergency airway management in most trauma patients.[1 4 5] Recent studies reported that RSI is the most common airway management method in emergency departments (EDs) in North America and Europe.[6-9] Despite the ubiquitous practice of emergency airway management in trauma patients, little is known about its current practice and performance in other industrialized nations. Therefore, we sought to describe the current practice of airway management for trauma patients in the EDs in Japan.

## 2. METHODS

### Study Design and Setting

We analyzed the data of a prospective, observational, multi-center registry, the Japanese Emergency Airway Network (JEAN) registry. The study design, setting, methods of measurement, and measured variables have been reported elsewhere.[10-13] Briefly, the registry is a consortium of 13 academic and community EDs from different geographic regions across Japan. These EDs consisted of 10 tertiary medical centers that have a capability to manage the most severe trauma patients and 3 secondary medical centers that are designated to treat moderately severe trauma patients. The participating EDs had a median ED census of 30,000 patient visits per year (range 9,000 to 67,000). All 13 EDs were staffed by attending emergency physicians, and 12 had affiliations with emergency medicine residency training programs. Each hospital maintained individual protocols, policies, and procedures for emergency airway management. Intubations were performed by attending physicians or by resident physicians at the discretion of the ED attending physician. The ethics committee of each participating center approved the protocol, with waiver of informed consent before data collection.

### Patients

The registry prospectively collected information on consecutive patients who underwent airway management in the participating EDs during a 30-month period, from March 2010 to August 2012. All adult and pediatric trauma patients who underwent intubation were eligible for this analysis. We excluded an ED in which the number of trauma intubations was less than 10 from the current analysis.



1  
2  
3  
4  
5  
6  
7  
8  
9  
10  
11  
12  
13  
14  
15  
16  
17  
18  
19  
20  
21  
22  
23  
24  
25  
26  
27  
28  
29  
30  
31  
32  
33  
34  
35  
36  
37  
38  
39  
40  
41  
42  
43  
44  
45  
46  
47  
48  
49  
50  
51  
52  
53  
54  
55  
56  
57  
58  
59  
60

### Data Collection

Data collection was passive, relying on self-reports by the intubators on duty. After each intubation, the intubators completed a standardized data sheet, including the patient's age, sex, estimated weight, primary indication for intubation, methods used to facilitate intubation, intubator's level of training (emergency physicians, resident physicians, and transitional year residents) and specialty (emergency physician or not), number of attempts, success or failure, and intubation-related adverse events. Method was defined as the set of medications and devices used, such as RSI with a Macintosh laryngoscope. Transitional-years residents were post-graduate year 1-2 physicians who rotate through the ED. An intubation attempt was defined as a single insertion of the laryngoscope (or other device) past the teeth.[2 10-13] For nasal intubations, an attempt was defined as a single insertion of a tracheal tube past the turbinates. An attempt was successful if it resulted in the tracheal tube being passed through the vocal cords. One or more methods could be used in each patient, and each method could be attempted several times.

Adverse events were recorded using a pre-specified list, with the option to include additional comments, if necessary. **Adverse events were defined as cardiac arrest, hypotension, hypoxemia, dysrhythmia, vomiting, esophageal intubation, mainstem bronchial intubation, and airway trauma that are considered to be intubation-related.[11] Cardiac arrest included asystole, bradycardia, or dysrhythmia with nonmeasurable blood pressure and cardiopulmonary resuscitation during or after intubation. Hypotension was defined as systolic blood pressure less than 90 mm Hg. Hypoxemia was defined as pulse oximetric**

1  
2  
3  
4  
5  
6  
7  
8  
9 **saturation less than 90% during an intubation attempt, not a result of esophageal**  
10 **intubation. Preexisting hypotension or hypoxemia before an intubation attempt were not**  
11 **counted as an adverse event. Esophageal intubation was defined as misplacement of the**  
12 **endotracheal tube in the upper esophagus or hypopharynx, with a lapse of time and**  
13 **desaturation (pulse oximetric saturation <90%) before the removal of the misplaced tube.**

14  
15  
16  
17  
18 We monitored compliance with data form completion by reviewing professional billing records.

19  
20 Where the data collection form was missing, the intubator was interviewed by one of the  
21  
22 investigators within 2 weeks of the patient encounter, to fill out the data form.

23  
24  
25  
26 The outcomes of interest were the primary indication for intubation, initial method used for  
27  
28 intubation, intubation success rates (on the first attempt and within three attempts), and  
29 **intubation-related** adverse event rates.

### 30 31 32 33 **Statistical Analysis**

34  
35 We performed all analysis with JMP 10 software (SAS Institute Inc., Cary, NC, USA). At the  
36  
37 patient-level, we described patient demographics, the primary indication for intubation, initial  
38  
39 method of intubation, success rates, and adverse event rates as proportions with 95% confidence  
40  
41 intervals (CIs) and medians with interquartile ranges (IQR). Then, at the ED-level, we described  
42  
43 medians, IQR and ranges for each outcome for all trauma patients. We also repeated the analysis  
44  
45 after stratifying by indication (non-cardiac arrest vs. cardiac arrest) and specialty (emergency  
46  
47 physicians vs. non-emergency physicians). All *P*-values were two-tailed, with *P*<0.05 considered  
48  
49 statistically significant.

1  
2  
3  
4  
5  
6  
7  
8  
9  
10  
11  
12  
13  
14  
15  
16  
17  
18  
19  
20  
21  
22  
23  
24  
25  
26  
27  
28  
29  
30  
31  
32  
33  
34  
35  
36  
37  
38  
39  
40  
41  
42  
43  
44  
45  
46  
47  
48  
49  
50  
51  
52  
53  
54  
55  
56  
57  
58  
59  
60

### 3. RESULTS

During the 30-month study period, 4,268 patients required emergency airway management. Of these, the registry recorded 4,094 intubations (capture rate, 95.9%; **Figure 1**), of which 3370 patients who underwent airway management for medical reasons were excluded from the analysis. One of the 13 hospitals, in whom only 1 trauma patient required airway intervention during the study period, was excluded because the number of intubations for trauma care was less than 10 during the study period. Hence, 723 trauma patients were eligible for analysis. Emergency physicians, including emergency medicine residents, performed the first intubation attempts in 60.0% (95% CI, 56.4%-63.5%) of all trauma patients and 66.7% (95% CI, 62.4%-70.8%) of non-cardiac arrest patients. Transitional-year residents (postgraduate years 1 and 2) performed the first intubation attempts in 31.4% (95% CI, 28.1%-34.9%) of all trauma patients and 25.7% (95% CI, 22.0%-29.7%) of non-cardiac arrest patients.

**Table 1** shows the baseline characteristics and primary indications in patients who required trauma airway management. Median age was 56 years; two-thirds of the patients were male. Traumatic cardiac arrest was the reason for intubation in 32.6% (95% CI, 29.3%-36.1%) of all trauma patients, while head trauma accounted for 30.4% (95% CI, 27.2%-33.9%). **Table 2** shows the initial method of airway management in the trauma patients. RSI was the initial method chosen in 23.9% (95% CI, 21.0%-27.2%) of all trauma patients and 35.5% (95% CI, 31.4%-39.9%) of non-cardiac arrest patients. Cricothyrotomy was performed as the initial airway management strategy in 2.2% (95% CI, 1.4%-3.6%) of all trauma patients and 0.4% (95% CI, 0.1%-1.5%) of non-cardiac arrest patients. The direct laryngoscope was used in most of

intubations (n=654, 90.5%), and the remaining were intubated using a video laryngoscope (n=30,

Formatted: Font: Not Bold

4.1%), a bronchoscope (n=17, 2.4%), a lighted stylet (n=1, 0.1%) on the first attempt.

**Table 1. Characteristics of the 723 trauma patients who required intubation**

| Patient characteristics               |      |               |
|---------------------------------------|------|---------------|
| Age (y), median, (IQR)                | 56   | (34 - 73)     |
| Male, % (95% CI)                      | 66.9 | (63.4 - 70.3) |
| Estimated weight (kg), median, (IQR)  | 60   | (50 - 70)     |
| Indication for intubation, % (95% CI) |      |               |
| Cardiac arrest                        | 32.6 | (29.3 - 36.1) |
| Head trauma                           | 30.4 | (27.2 - 33.9) |
| Shock                                 | 16.6 | (14.1 - 19.5) |
| Facial/Neck trauma                    | 8.4  | (6.6 - 10.7)  |
| Airway burn                           | 6.8  | (5.2 - 8.8)   |
| Others                                | 5.1  | (3.3 - 8.0)   |

Abbreviations: CI, confidence interval; IQR, interquartile range

**Table 2. Initial method of intubation**

|                             | All trauma patients |      |               | Non-cardiac arrest patients |      |               |
|-----------------------------|---------------------|------|---------------|-----------------------------|------|---------------|
|                             | n                   | %    | 95% CI        | n                           | %    | 95% CI        |
| Rapid sequence intubation   | 173                 | 23.9 | (21.0 - 27.2) | 173                         | 35.5 | (31.4 - 39.9) |
| Sedation without paralysis  | 153                 | 21.2 | (18.3 - 24.3) | 153                         | 31.4 | (27.5 - 35.7) |
| Paralytics without sedation | 19                  | 2.6  | (1.7 - 4.1)   | 19                          | 3.9  | (2.5 - 6.0)   |
| Oral without sedation       | 349                 | 48.3 | (44.6 - 52.0) | 127                         | 26.1 | (22.4 - 30.2) |
| Surgical                    | 16                  | 2.2  | (1.4 - 3.6)   | 2                           | 0.4  | (0.1 - 1.5)   |
| Nasal intubation            | 13                  | 1.8  | (1.1 - 3.1)   | 13                          | 2.7  | (1.6 - 4.5)   |
| Total                       | 723                 | 100  |               | 487                         | 100  |               |

Abbreviations: CI, confidence interval

**Table 3** summarizes the intubation success rates and adverse event rates. Overall, intubation was successful in the first attempt in 63.8% (95% CI, 60.2%-67.2%) and within 3 attempts in 96.0% (95% CI, 94.3%-97.2%) of all trauma patients. In non-cardiac arrest patients, intubation was successful in the first attempt in 60.2% (95% CI, 55.8%-64.4%) and within 3 attempts in 94.5%

1  
2  
3  
4  
5  
6  
7  
8  
9 (95% CI, 92.1%-96.2%) of patients. In cardiac arrest patients, intubation was successful in the  
10 first attempt in 71.2% (95% CI, 65.1%-76.6%) and within 3 attempts in 99.2% (95% CI,  
11 97.0%-99.8%) of the patients. In the stratified analysis by the specialty (i.e., emergency  
12 physicians [n=434] vs. non-emergency physicians [n=289]), emergency physicians had a higher  
13 success at the first attempt (72.8 % vs. 50.2 %, p<0.001) compared to non-emergency physicians  
14 **(including all transitional-year residents [n=237])**. Intubation-associated adverse event rates  
15 were 10.8% (95% CI, 8.7%-13.3%) in overall trauma patients, 11.5% (95% CI, 9.0%-14.6%) in  
16 non-cardiac arrest patients, and 9.3% (95% CI, 6.2%-13.7%) in cardiac arrest patients.  
17  
18  
19  
20  
21  
22  
23  
24  
25

26 At the ED-level, there was a wide variation in the methods of intubation across the 12 EDs  
27 **(Figure 2)**. For example, RSI as the initial intubation method was performed in 0% to 50.9% of  
28 all trauma patients, and in 0% to 87.5% of non-cardiac arrest patients. Similarly, there was a  
29 wide variation in the success rates and adverse event rates across the EDs **(Figure 3)**. The range  
30 of overall success rates for intubation in the first attempt ranged from 35.5% to 90.5%, and from  
31 85.1% to 100% within 3 attempts. Likewise, overall adverse event rates varied widely (range,  
32 0%-16.7%) across the EDs. These wide variations in intubation success rates and adverse event  
33 rates persisted across the non-cardiac arrest and cardiac arrest strata.  
34  
35  
36  
37  
38  
39  
40  
41  
42  
43  
44  
45  
46  
47  
48  
49  
50  
51  
52  
53  
54

**Table 3. Success rates and intubation-associated adverse events**

|                              | All trauma patients |      |               | Non-cardiac arrest patients |      |               | Cardiac arrest patients |      |               |
|------------------------------|---------------------|------|---------------|-----------------------------|------|---------------|-------------------------|------|---------------|
|                              | n                   | %    | 95% CI        | n                           | %    | 95% CI        | n                       | %    | 95% CI        |
| Successful in 1st attempt    | 461                 | 63.8 | (60.2 - 67.2) | 293                         | 60.2 | (55.8 - 64.4) | 168                     | 71.2 | (65.1 - 76.6) |
| Successful in ≤ 3rd attempts | 694                 | 96.0 | (94.3 - 97.2) | 460                         | 94.5 | (92.1 - 96.2) | 234                     | 99.2 | (97.0 - 99.8) |
| Adverse events               | 78                  | 10.8 | (8.7 - 13.3)  | 56                          | 11.5 | (9.0 - 14.6)  | 22                      | 9.3  | (6.2 - 13.7)  |
| Details of adverse events*   |                     |      |               |                             |      |               |                         |      |               |
| Esophageal intubation        | 25                  | 3.5  | (2.2 - 5.1)   | 15                          | 3.1  | (1.7 - 5.0)   | 10                      | 4.2  | (2.0 - 7.7)   |
| Mainstem bronchus intubation | 18                  | 2.5  | (1.5 - 3.9)   | 9                           | 1.8  | (0.8 - 3.5)   | 9                       | 3.8  | (1.7 - 7.1)   |
| Airway trauma                | 17                  | 2.4  | (1.4 - 3.7)   | 14                          | 2.9  | (1.6 - 4.8)   | 3                       | 1.3  | (0.3 - 3.7)   |
| Hypotension†                 | 8                   | 1.1  | (0.5 - 2.2)   | 8                           | 1.6  | (0.7 - 3.2)   |                         |      |               |
| Vomiting                     | 6                   | 0.8  | (0.3 - 1.8)   | 6                           | 1.2  | (0.5 - 2.7)   |                         |      |               |
| Hypoxia‡                     | 3                   | 0.4  | (0.1 - 1.2)   | 3                           | 0.6  | (0.1 - 1.8)   |                         |      |               |
| Cardiac arrest               | 1                   | 0.1  | (0.0 - 0.8)   | 1                           | 0.2  | (0.0 - 1.1)   |                         |      |               |

Abbreviations: CI, confidence interval

\*Patients may have more than 1 adverse event.

†Hypotension was defined as systolic blood pressure less than 90 mm Hg.

‡Hypoxia was defined as pulse oximetric oxygen saturation of less than 90% during intubation attempts, not as a result of esophageal intubation.

1  
2  
3  
4  
5  
6  
7  
8  
9  
10  
11  
12  
13  
14  
15  
16  
17  
18  
19  
20  
21  
22  
23  
24  
25  
26  
27  
28  
29  
30  
31  
32  
33  
34  
35  
36  
37  
38  
39  
40  
41  
42  
43  
44  
45  
46  
47  
48  
49  
50  
51  
52  
53  
54  
55  
56  
57  
58  
59  
60

#### 4. DISCUSSION

In this prospective, multicenter, observational study in Japan, we observed an acceptable success rate of airway management in trauma patients in EDs. However, we also found a wide range of variation in the initial method of intubation, success rates, and adverse event rates during trauma airway management across the EDs. Indeed, the overall success rates in the first intubation attempt ranged from 35.5% to 90.5%.

We were struck by the high degree of variation in the methods of airway management in trauma cases across the 12 EDs. The reasons for the observed practice variations are unclear and are likely multifactorial. It is possible that non-RSI methods were attempted in patients who were predicted to have a difficult intubation. However, the difference in the patient population across the EDs cannot fully explain the observed three-fold difference in the use of RSI. **Therefore, some of the patients might have been inappropriately considered as “difficult intubation,” and intubated with non-RSI methods. Alternatively, it is also plausible** that non-RSI methods were more frequently used in certain EDs because of the physicians’ preference, procedural experiences, training background, or differences in ED staffing and institutional policies.

Our study also demonstrated a high degree of variations in success and adverse event rates among the EDs. Particularly, the success rate at first attempts was highly variable. To the best of our knowledge, this is the first study to demonstrate such inter-hospital variations in success and adverse event rates in trauma airway management in different EDs. The reasons for the variations among the EDs are likely multifactorial; the potential explanations include

Formatted: Font: Not Bold

1  
2  
3  
4  
5  
6  
7  
8  
9 inter-hospital differences in patient population, skills or education backgrounds of intubators,[14]  
10 drug and device availability in the ED, or any combination of these factors. Alternatively, the  
11 observed wide variation in the intubation method may have led to these variations in success and  
12 adverse event rates. Furthermore, there are no requirements for procedural credentials to perform  
13 ED intubations both in individuals and institutions in Japan.[10] This lack of procedural  
14 requirements would have contributed, at least partially, to the observed inter-hospital variations  
15 in the success rates. Indeed, we observed that intubation success rates performed by  
16 non-emergency physicians were significantly lower; this was, at least in part, explained by the  
17 intubation attempts by transitional-year residents. However, it is well documented in the  
18 literature that first-pass success is important in critically-ill patients[11]; therefore, the observed  
19 lower success rate by these non-skilled physicians cannot be justified. Our data underscore the  
20 reinforcement of Japanese methodology of training for non-skilled physicians (e.g., the use of  
21 simulators and training in a more controlled setting[15-17] to improve their intubation skill set,  
22 which will, in turn, improve patients' outcomes.

Formatted: Font: Not Bold

23  
24  
25  
26  
27  
28  
29  
30  
31  
32  
33  
34  
35  
36  
37 Although international and Japanese trauma care guidelines recommend the use of RSI as the  
38 initial method of emergency airway management in most trauma patients,[14 5] the evidence for  
39 accurately predicting patients in whom RSI should be avoided remain limited.[18 19] It is,  
40 therefore, plausible that the scarcity of evidence may have contributed to the practice variations  
41 across the EDs. Our observations should facilitate further investigation of any barriers to the  
42 delivery of safer trauma care nationally. Additionally, building more robust evidence on trauma  
43 airway management, coupled with improved dissemination of these findings, could decrease the  
44 variations in trauma care across the EDs in Japan.



1  
2  
3  
4  
5  
6  
7  
8  
9  
10  
11 Our study has several potential limitations. First, this passive surveillance of the study data is  
12 subject to self-reporting bias, leading to a possible underestimation of failed intubations and  
13 adverse events. However, active independent monitoring of ED intubations is difficult to  
14 accomplish. We did, however, use a self-reporting system with structured data forms, uniform  
15 definitions, and a high capture rate. Second, we did not design this study to measure patient  
16 outcomes, such as long-term mortality or morbidity. A more detailed analysis of adverse events  
17 and outcomes requires following the patients for a longer period. Third, we did not account for  
18 several potential confounders, such as severities (the Injury Severity Score, the Revised Trauma  
19 Score, etc.) of cases and training levels of physicians. However, this prospective multicenter data  
20 reflect the current airway management in the natural setting of a “real” population and current  
21 clinical practice, therefore enhancing the potential generalizability of the findings. Finally, all  
22 EDs in this study were designated as tertiary or academic general hospitals, and all but one of the  
23 EDs were affiliated with an emergency medicine residency program in Japan. Therefore, our  
24 inferences may not be generalizable to trauma airway management in non-academic EDs or other  
25 developed nations. These observations, however, are highly relevant from a policy standpoint. As  
26 these EDs provide advanced care for trauma victims and train the majority of emergency  
27 physicians, these EDs have a disproportionate impact on current and future trauma care in EDs.  
28  
29  
30  
31  
32  
33  
34  
35  
36  
37  
38  
39  
40  
41  
42  
43  
44

## 45 5. CONCLUSION

46 In this multicenter prospective study of emergency airway management in Japan, we found an  
47 acceptable overall success rate in trauma airway management. However, we also found that the  
48 method of intubation, success rates and adverse event rates were highly variable among EDs. For  
49  
50  
51  
52  
53  
54

1  
2  
3  
4  
5  
6  
7  
8  
9 researchers, our observations should facilitate further investigations to identify the reasons of the  
10 inter-hospital variations. Additionally, for policy makers and professional organizations, our  
11 findings suggest that development and dissemination of nationwide protocols are warranted to  
12 achieve safer airway management for trauma victims in Japan.  
13  
14  
15  
16  
17  
18  
19  
20  
21  
22  
23  
24  
25  
26  
27  
28  
29  
30  
31  
32  
33  
34  
35  
36  
37  
38  
39  
40  
41  
42  
43  
44  
45  
46  
47  
48  
49  
50  
51  
52  
53  
54  
55  
56  
57  
58  
59  
60

1  
2  
3  
4  
5  
6  
7  
8  
9  
10  
11  
12  
13  
14  
15  
16  
17  
18  
19  
20  
21  
22  
23  
24  
25  
26  
27  
28  
29  
30  
31  
32  
33  
34  
35  
36  
37  
38  
39  
40  
41  
42  
43  
44  
45  
46  
47  
48  
49  
50  
51  
52  
53  
54  
55  
56  
57  
58  
59  
60**Acknowledgments**

The authors acknowledge the following research personnel at the study hospitals for their assistance with this project: Fukui University Hospital (Hideya Nagai, MD, Hiroshi Morita MD); Fukui Prefectural Hospital (Yukinori Kato, MD, Hidenori Higashi, MD); Japanese Red Cross Medical Center of Wakayama (Hiroshi Okamoto, MD); Kameda Medical Center (Kenzo Tanaka, MD); National Center for Global Health and Medicine (Taigo Sakamoto, MD, Shunichiro Nakao, MD); Nagoya Ekisaikai Hospital (Yukari Goto, MD); Niigata City General Hospital (Nobuhiro Sato, MD, MPH); Obama Municipal Hospital (Takuyo Chiba, MD); Okinawa Chubu Prefectural Hospital (Masashi Okubo, MD); Osaka Saiseikai Senri Hospital (Kazuaki Shigemitsu, MD); and Shonan Kamakura General Hospital (Taichi Imamura, MD).

Finally, we are grateful to our many emergency physicians and residents for their perseverance in pursuing new knowledge about this vital resuscitative procedure.

**Author Contribution**

K.H. designed the study, for which S.N. and Y.H. contributed to the data collection and analysis. S.N. wrote the manuscript, which A.K. reviewed.

**Data Sharing Statement**

No additional data available

## References

1. American College of Surgeons CoT. *Advanced Trauma Life Support for Doctors, Student Course Manual*. 8th ed. Chicago, IL, 2008.
2. Walls RM, Brown CA, 3rd, Bair AE, et al. Emergency airway management: a multi-center report of 8937 emergency department intubations. *The Journal of emergency medicine* 2011;41:347-54 doi: 10.1016/j.jemermed.2010.02.024.
3. Hussain LM, Redmond AD. Are pre-hospital deaths from accidental injury preventable? *Bmj* 1994;308:1077-80 doi: 10.1136/bmj.308.6936.1077.
4. *Japan Advanced Trauma Evaluation and Care (JATEC™) guideline*. 3rd edition ed, 2008.
5. Dunham CM, Barraco RD, Clark DE, et al. Guidelines for emergency tracheal intubation immediately after traumatic injury. *The Journal of trauma* 2003;55:162-79 doi: 10.1097/01.ta.0000083335.93868.2c.
6. Graham CA. Emergency department airway management in the UK. *Journal of the Royal Society of Medicine* 2005;98:107-10 doi: 10.1258/jrsm.98.3.107.
7. Sakles JC, Laurin EG, Rantapaa AA, et al. Airway management in the emergency department: a one-year study of 610 tracheal intubations. *Annals of emergency medicine* 1998;31:325-32 doi: 10.1016/S0196-064470342-7.
8. Sagarin MJ, Barton ED, Chng YM, et al. Airway management by US and Canadian emergency medicine residents: a multicenter analysis of more than 6,000 endotracheal intubation attempts. *Annals of emergency medicine* 2005;46:328-36 doi: 10.1016/j.annemergmed.2005.01.009.
9. Graham CA, Beard D, Henry JM, et al. Rapid sequence intubation of trauma patients in Scotland. *The Journal of trauma* 2004;56:1123-6 doi:

- 1  
2  
3  
4  
5  
6  
7  
8  
9 10.1097/01.TA.0000109066.62811.8A.
- 10  
11 10. Hasegawa K, Hagiwara Y, Chiba T, et al. Emergency airway management in Japan:  
12 Interim analysis of a multi-center prospective observational study. *Resuscitation*  
13 2012;83:428-33 doi: 10.1016/j.resuscitation.2011.11.027.
- 14  
15  
16 11. Hasegawa K, Shigemitsu K, Hagiwara Y, et al. Association between repeated intubation  
17 attempts and adverse events in emergency departments: an analysis of a multicenter  
18 prospective observational study. *Annals of emergency medicine* 2012;60:749-54 e2 doi:  
19 10.1016/j.annemergmed.2012.04.005.
- 20  
21  
22 12. Imamura T, Brown CA, 3rd, Ofuchi H, et al. Emergency airway management in geriatric  
23 and younger patients: analysis of a multicenter prospective observational study. *The*  
24 *American journal of emergency medicine* 2013;31:190-6 doi:  
25 10.1016/j.ajem.2012.07.008.
- 26  
27  
28 13. Hasegawa K, Hagiwara Y, Imamura T, et al. Increased incidence of hypotension in  
29 elderly patients who underwent emergency airway management: an analysis of a  
30 multi-centre prospective observational study. *International journal of emergency*  
31 *medicine* 2013;6:12 doi: 10.1186/1865-1380-6-12.
- 32  
33  
34 14. Graham CA, Beard D, Oglesby AJ, et al. Rapid sequence intubation in Scottish urban  
35 emergency departments. *Emergency medicine journal : EMJ* 2003;20:3-5
- 36  
37  
38 15. Mayo PH, Hackney JE, Mueck JT, et al. Achieving house staff competence in  
39 emergency airway management: results of a teaching program using a computerized  
40 patient simulator. *Critical care medicine* 2004;32:2422-7
- 41  
42  
43 16. Cook DA, Hatala R, Brydges R, et al. Technology-enhanced simulation for health  
44 professions education: a systematic review and meta-analysis. *JAMA : the journal of the*  
45  
46  
47  
48  
49  
50  
51  
52  
53  
54

American Medical Association 2011;306:978-88 doi: 10.1001/jama.2011.1234.

17. Bernhard M, Mohr S, Weigand MA, et al. Developing the skill of endotracheal intubation: implication for emergency medicine. *Acta anaesthesiologica Scandinavica* 2012;56:164-71 doi: 10.1111/j.1399-6576.2011.02547.x.
18. Reed MJ, Dunn MJ, McKeown DW. Can an airway assessment score predict difficulty at intubation in the emergency department? *Emergency medicine journal : EMJ* 2005;22:99-102 doi: 10.1136/emj.2003.008771.
19. Soyuncu S, Eken C, Cete Y, et al. Determination of difficult intubation in the ED. *The American journal of emergency medicine* 2009;27:905-10 doi: 10.1016/j.ajem.2008.07.003.

1  
2  
3  
4  
5  
6  
7  
8  
9  
10  
11  
12  
13  
14  
15  
16  
17  
18  
19  
20  
21  
22  
23  
24  
25  
26  
27  
28  
29  
30  
31  
32  
33  
34  
35  
36  
37  
38  
39  
40  
41  
42  
43  
44  
45  
46  
47  
48  
49  
50  
51  
52  
53  
54  
55  
56  
57  
58  
59  
60

### Figure Legends

**Figure 1. Flow chart showing inclusion of patients in this study**

**Figure 2. Inter-hospital variations in initial methods of intubation**

Boxplots of inter-hospital variations in the initial methods of intubation. The line in the middle of the box represents the median, with the lower and upper limits of the box representing the 25th and 75th percentiles, respectively. The whiskers from the box extend to the minimum and maximum values.

**Figure 3. Inter-hospital variations in success rates and adverse event rates**

Boxplots of inter-hospital variations in success rates and adverse event rates. The line in the middle of the box represents the median, with the lower and upper limits of the box representing the 25th and 75th percentiles. The whiskers from the box extend to the minimum and maximum values.

# BMJ Open

## Trauma airway management in emergency departments: A multicenter, prospective, observational study in Japan

|                                 |                                                                                                                                                                                                                                                                                                                                                                                                                                                     |
|---------------------------------|-----------------------------------------------------------------------------------------------------------------------------------------------------------------------------------------------------------------------------------------------------------------------------------------------------------------------------------------------------------------------------------------------------------------------------------------------------|
| Journal:                        | <i>BMJ Open</i>                                                                                                                                                                                                                                                                                                                                                                                                                                     |
| Manuscript ID:                  | bmjopen-2014-006623.R3                                                                                                                                                                                                                                                                                                                                                                                                                              |
| Article Type:                   | Research                                                                                                                                                                                                                                                                                                                                                                                                                                            |
| Date Submitted by the Author:   | 19-Dec-2014                                                                                                                                                                                                                                                                                                                                                                                                                                         |
| Complete List of Authors:       | Nakao, Shunichiro; University of Ottawa / The Ottawa Hospital - Civic Campus, Department of Emergency Medicine<br>Kimura, Akio; National Center for Global Health and Medicine, Department of Emergency Medicine and Critical Care<br>Hagiwara, Yusuke; Tokyo Metropolitan Children's Medical Center, Department of Emergency Medicine<br>Hasegawa, Kohei; Massachusetts General Hospital, Harvard Medical School, Department of Emergency Medicine |
| <b>Primary Subject Heading</b>: | Emergency medicine                                                                                                                                                                                                                                                                                                                                                                                                                                  |
| Secondary Subject Heading:      | Medical management                                                                                                                                                                                                                                                                                                                                                                                                                                  |
| Keywords:                       | TRAUMA MANAGEMENT, ACCIDENT & EMERGENCY MEDICINE, MEDICAL EDUCATION & TRAINING                                                                                                                                                                                                                                                                                                                                                                      |
|                                 |                                                                                                                                                                                                                                                                                                                                                                                                                                                     |

SCHOLARONE™  
Manuscripts



1  
2  
3 **Trauma airway management in emergency departments: A multicenter, prospective,**  
4 **observational study in Japan**  
5  
6  
7  
8  
9

10 Shunichiro Nakao, MD<sup>1</sup>; Akio Kimura, MD, PhD<sup>1</sup>; Yusuke Hagiwara, MD, MPH<sup>2</sup>; and Kohei  
11 Hasegawa, MD, MPH<sup>3</sup>, on behalf of the Japanese Emergency Medicine Network Investigators  
12  
13  
14  
15

16  
17 <sup>1</sup>Department of Emergency Medicine and Critical Care, National Center for Global Health and  
18 Medicine, Shinjuku, Tokyo, Japan; <sup>2</sup>Department of Emergency Medicine, Tokyo Metropolitan  
19 Children's Medical Center, Fuchu, Tokyo, Japan; <sup>3</sup>Department of Emergency Medicine,  
20 Massachusetts General Hospital, Harvard Medical School, Boston, Massachusetts, the United  
21 States  
22  
23  
24  
25  
26  
27  
28  
29  
30  
31

32 **Address correspondence to:** Dr. Shunichiro Nakao  
33

34 Department of Emergency Medicine, University of Ottawa / The Ottawa Hospital - Civic  
35 Campus, 1053 Carling Ave, Room F653, Ottawa, ON K1Y 4E9  
36  
37

38 Tel: 613.798.5555 ext. 15976  
39

40 Email: shunichiro-nakao@umin.ac.jp  
41  
42  
43  
44  
45

46 **Co-authors' address**  
47

48 Akio Kimura, MD, PhD; 1-21-1, Toyama, Shinjuku, Tokyo, Japan, Tel: + 81332027181, Email:  
49

50 akimura@hosp.ncgm.go.jp  
51  
52

53 Yusuke Hagiwara, MD, MPH; 304 Keyaki-ryo, 2-9-2 Musashidai, Fuchu, Tokyo, Japan, Tel:  
54

55 +810423005111, Email: yusukehagiwara-tky@umin.ac.jp  
56  
57  
58  
59  
60

1  
2  
3 Kohei Hasegawa, MD, MPH; 326 Cambridge Street, Suite 410, Boston, Tel: 6177245276, Email:  
4  
5 khasegawa1@partners.org  
6  
7  
8  
9  
10  
11

12 **Financial Disclosure:** This study was supported by a grant from St. Luke's Life Science Institute  
13 and a grant from Massachusetts General Hospital and Brigham and Women's Hospital. The study  
14 sponsors have no involvement in designing the study, in the collection, analysis and  
15 interpretation of data, in the writing of the manuscript, and in the decision to submit the  
16 manuscript for publication.  
17  
18  
19  
20  
21  
22  
23  
24  
25  
26

27 **Conflict of Interest:** None of the authors have any conflict of interest to declare.  
28  
29  
30  
31

32 **Keywords:** Airway management, intubation, emergency department, practice variation, rapid  
33 sequence intubation  
34  
35  
36  
37  
38  
39  
40  
41  
42  
43  
44  
45  
46  
47  
48  
49  
50  
51  
52  
53  
54  
55  
56  
57  
58  
59  
60

## Abstract

Objectives: Although successful airway management is essential for emergency trauma care, comprehensive studies are limited. We sought to characterize the current trauma care practice of airway management in the emergency departments (EDs) in Japan.

Design: Analysis of data from a prospective, observational, multi-center registry – the Japanese Emergency Airway Network (JEAN) registry.

Setting: 13 academic and community EDs from different geographic regions across Japan.

Participants: 723 trauma patients who underwent emergency intubation from March 2010 through August 2012.

Outcome measures: ED characteristics, patient and operator demographics, methods of airway management, intubation success or failure at each attempt, and adverse events.

Results: A total of 723 trauma patients who underwent emergency intubation were eligible for the analysis. Traumatic cardiac arrest comprised 32.6% (95% CI, 29.3%-36.1%) of patients.

Rapid sequence intubation (RSI) was the initial method chosen in 23.9% (95% CI, 21.0%-27.2%) of all trauma patients, and in 35.5% (95% CI, 31.4%-39.9%) of non-cardiac arrest trauma patients. Overall, intubation was successful in  $\leq 3$  attempts in 96.0% of patients (95% CI, 94.3%-97.2%). There was a wide variation in the initial methods of intubation; RSI as the initial method was performed in 0% to 50.9% of all trauma patients among 12 EDs. Similarly, there was a wide variation in success rates and adverse event rates across the EDs. Success rates varied between 35.5% and 90.5% at the first attempt and 85.1% and 100% within 3 attempts across the 12 EDs.

1  
2  
3  
4  
5  
6 Conclusion: In this multicenter prospective study in Japan, we observed a high overall success  
7  
8 rate in airway management during trauma care. However, the methods of intubation and success  
9  
10 rates were highly variable among hospitals.  
11  
12  
13  
14  
15  
16  
17  
18  
19  
20  
21  
22  
23  
24  
25  
26  
27  
28  
29  
30  
31  
32  
33  
34  
35  
36  
37  
38  
39  
40  
41  
42  
43  
44  
45  
46  
47  
48  
49  
50  
51  
52  
53  
54  
55  
56  
57  
58  
59  
60

**Article summary****Article focus**

This paper characterizes the current practice of airway management for trauma patients in emergency departments (EDs) in Japan by using data from the Japanese Emergency Airway Network (JEAN) Study.

**Key messages**

The method of intubation, success rates, and adverse event rates are highly variable among EDs. Development and dissemination of nationwide protocols are warranted to achieve safer airway management for trauma victims in Japan.

**Strengths and limitations of this study**

This is the first study to report disparities in trauma airway management based on multicenter, prospective data.

Passive surveillance of data is subject to self-reporting bias, leading to a possible underestimation of failed intubations and adverse events.

## 1. INTRODUCTION

Successful airway management is a cornerstone in the modern practice of emergency and trauma care. Failure of emergency airway management is often associated with morbidity and mortality in trauma patients.[1-3] Consequently, training in and understanding of airway management is a distinct discipline that is essential for successful trauma resuscitation.

Evidence-based recommendations for airway management during trauma care exist within international and national guidelines of the United States. These guidelines indicate rapid sequence intubation (RSI) as the initial method of emergency airway management in most trauma patients.[1 4 5] Recent studies reported that RSI is the most common airway management method in emergency departments (EDs) in North America and Europe.[6-9] Despite the ubiquitous practice of emergency airway management in trauma patients, little is known about its current practice and performance in other industrialized nations. Therefore, we sought to describe the current practice of airway management for trauma patients in the EDs in Japan.

## 2. METHODS

### Study Design and Setting

We analyzed the data of a prospective, observational, multi-center registry, the Japanese Emergency Airway Network (JEAN) registry. The study design, setting, methods of measurement, and measured variables have been reported elsewhere.[10-13] Briefly, the registry is a consortium of 13 academic and community EDs from different geographic regions across Japan. These EDs consisted of 10 tertiary medical centers that have a capability to manage the most severe trauma patients and 3 secondary medical centers that are designated to treat moderately severe trauma patients. The participating EDs had a median ED census of 30,000 patient visits per year (range 9,000 to 67,000). The participating hospitals had a median trauma admission of 1,000 per year (range, 300 to 1,500).[14] All 13 EDs were staffed by attending emergency physicians, and 12 had affiliations with emergency medicine residency training programs. Each hospital maintained individual protocols, policies, and procedures for emergency airway management. Intubations were performed by attending physicians or by resident physicians at the discretion of the ED attending physician. The ethics committee of each participating center approved the protocol, with waiver of informed consent before data collection.

### Patients

The registry prospectively collected information on consecutive patients who underwent airway management in the participating EDs during a 30-month period, from March 2010 to August 2012. All adult and pediatric trauma patients who underwent intubation were eligible for this

1  
2  
3 analysis. We excluded an ED in which the number of trauma intubations was less than 10 from  
4  
5 the current analysis.  
6  
7  
8  
9

## 10 **Data Collection**

11  
12 Data collection was passive, relying on self-reports by the intubators on duty. After each  
13  
14 intubation, the intubators completed a standardized data sheet, including the patient's age, sex,  
15  
16 estimated weight, primary indication for intubation, methods used to facilitate intubation,  
17  
18 intubator's level of training (emergency physicians, resident physicians, and transitional year  
19  
20 residents) and specialty (emergency physician or not), number of attempts, success or failure,  
21  
22 and intubation-related adverse events. Method was defined as the set of medications and devices  
23  
24 used, such as RSI with a Macintosh laryngoscope. Transitional-years residents were  
25  
26 post-graduate year 1-2 physicians who rotate through the ED. An intubation attempt was defined  
27  
28 as a single insertion of the laryngoscope (or other device) past the teeth.[2 10-13] For nasal  
29  
30 intubations, an attempt was defined as a single insertion of a tracheal tube past the turbinates. An  
31  
32 attempt was successful if it resulted in the tracheal tube being passed through the vocal cords.  
33  
34 One or more methods could be used in each patient, and each method could be attempted several  
35  
36 times.  
37  
38  
39  
40  
41  
42  
43  
44  
45

46 Adverse events were recorded using a pre-specified list, with the option to include additional  
47  
48 comments, if necessary. Adverse events were defined as cardiac arrest, hypotension, hypoxemia,  
49  
50 dysrhythmia, vomiting, esophageal intubation, mainstem bronchial intubation, and airway  
51  
52 trauma that are considered to be intubation-related.[11] Cardiac arrest included asystole,  
53  
54 bradycardia, or dysrhythmia with nonmeasurable blood pressure and cardiopulmonary  
55  
56  
57  
58  
59  
60



1  
2  
3 resuscitation during or after intubation. Hypotension was defined as systolic blood pressure less  
4  
5 than 90 mm Hg. Hypoxemia was defined as pulse oximetric saturation less than 90% during an  
6  
7 intubation attempt, not a result of esophageal intubation. Preexisting hypotension or hypoxemia  
8  
9 before an intubation attempt were not counted as an adverse event. Esophageal intubation was  
10  
11 defined as misplacement of the endotracheal tube in the upper esophagus or hypopharynx, with a  
12  
13 lapse of time and desaturation (pulse oximetric saturation <90%) before the removal of the  
14  
15 misplaced tube. We monitored compliance with data form completion by reviewing professional  
16  
17 billing records. Where the data collection form was missing, the intubator was interviewed by  
18  
19 one of the investigators within 2 weeks of the patient encounter, to fill out the data form.  
20  
21  
22  
23  
24  
25  
26

27 The outcomes of interest were the primary indication for intubation, initial method used for  
28  
29 intubation, intubation success rates (on the first attempt and within three attempts), and  
30  
31 intubation-related adverse event rates.  
32  
33  
34  
35

### 36 **Statistical Analysis**

37  
38 We performed all analysis with JMP 10 software (SAS Institute Inc., Cary, NC, USA). At the  
39  
40 patient-level, we described patient demographics, the primary indication for intubation, initial  
41  
42 method of intubation, success rates, and adverse event rates as proportions with 95% confidence  
43  
44 intervals (CIs) and medians with interquartile ranges (IQR). Then, at the ED-level, we described  
45  
46 medians, IQR and ranges for each outcome for all trauma patients. We also repeated the analysis  
47  
48 after stratifying by indication (non-cardiac arrest vs. cardiac arrest) and specialty (emergency  
49  
50 physicians vs. non-emergency physicians). All *P*-values were two-tailed, with *P*<0.05 considered  
51  
52 statistically significant.  
53  
54  
55  
56  
57  
58  
59  
60

### 3. RESULTS

During the 30-month study period, 4,268 patients required emergency airway management. Of these, the registry recorded 4,094 intubations (capture rate, 95.9%; **Figure 1**), of which 3370 patients who underwent airway management for medical reasons were excluded from the analysis. One of the 13 hospitals, in whom only 1 trauma patient required airway intervention during the study period, was excluded because the number of intubations for trauma care was less than 10 during the study period. Hence, 723 trauma patients were eligible for analysis.

Emergency physicians, including emergency medicine residents, performed the first intubation attempts in 60.0% (95% CI, 56.4%-63.5%) of all trauma patients and 66.7% (95% CI, 62.4%-70.8%) of non-cardiac arrest patients. Transitional-year residents (postgraduate years 1 and 2) performed the first intubation attempts in 31.4% (95% CI, 28.1%-34.9%) of all trauma patients and 25.7% (95% CI, 22.0%-29.7%) of non-cardiac arrest patients.

**Table 1** shows the baseline characteristics and primary indications in patients who required trauma airway management. Median age was 56 years; two-thirds of the patients were male. Traumatic cardiac arrest was the reason for intubation in 32.6% (95% CI, 29.3%-36.1%) of all trauma patients, while head trauma accounted for 30.4% (95% CI, 27.2%-33.9%). **Table 2** shows the initial method of airway management in the trauma patients. RSI was the initial method chosen in 23.9% (95% CI, 21.0%-27.2%) of all trauma patients and 35.5% (95% CI, 31.4%-39.9%) of non-cardiac arrest patients. Cricothyrotomy was performed as the initial airway management strategy in 2.2% (95% CI, 1.4%-3.6%) of all trauma patients and 0.4% (95% CI, 0.1%-1.5%) of non-cardiac arrest patients. The direct laryngoscope was used in most of intubations (n=654, 90.5%), and the remaining were intubated using a video laryngoscope (n=30,

4.1%), a bronchoscope (n=17, 2.4%), a lighted stylet (n=1, 0.1%) on the first attempt.

**Table 1. Characteristics of the 723 trauma patients who required intubation**

| Patient characteristics               |      |               |
|---------------------------------------|------|---------------|
| Age (y), median, (IQR)                | 56   | (34 - 73)     |
| Male, % (95% CI)                      | 66.9 | (63.4 - 70.3) |
| Estimated weight (kg), median, (IQR)  | 60   | (50 - 70)     |
| Indication for intubation, % (95% CI) |      |               |
| Cardiac arrest                        | 32.6 | (29.3 - 36.1) |
| Head trauma                           | 30.4 | (27.2 - 33.9) |
| Shock                                 | 16.6 | (14.1 - 19.5) |
| Facial/Neck trauma                    | 8.4  | (6.6 - 10.7)  |
| Airway burn                           | 6.8  | (5.2 - 8.8)   |
| Others                                | 5.1  | (3.3 - 8.0)   |

Abbreviations: CI, confidence interval; IQR, interquartile range

**Table 2. Initial method of intubation**

|                             | All trauma patients |      |               | Non-cardiac arrest patients |      |               |
|-----------------------------|---------------------|------|---------------|-----------------------------|------|---------------|
|                             | n                   | %    | 95% CI        | n                           | %    | 95% CI        |
| Rapid sequence intubation   | 173                 | 23.9 | (21.0 - 27.2) | 173                         | 35.5 | (31.4 - 39.9) |
| Sedation without paralysis  | 153                 | 21.2 | (18.3 - 24.3) | 153                         | 31.4 | (27.5 - 35.7) |
| Paralytics without sedation | 19                  | 2.6  | (1.7 - 4.1)   | 19                          | 3.9  | (2.5 - 6.0)   |
| Oral without sedation       | 349                 | 48.3 | (44.6 - 52.0) | 127                         | 26.1 | (22.4 - 30.2) |
| Surgical                    | 16                  | 2.2  | (1.4 - 3.6)   | 2                           | 0.4  | (0.1 - 1.5)   |
| Nasal intubation            | 13                  | 1.8  | (1.1 - 3.1)   | 13                          | 2.7  | (1.6 - 4.5)   |
| Total                       | 723                 | 100  |               | 487                         | 100  |               |

Abbreviations: CI, confidence interval

**Table 3** summarizes the intubation success rates and adverse event rates. Overall, intubation was successful in the first attempt in 63.8% (95% CI, 60.2%-67.2%) and within 3 attempts in 96.0% (95% CI, 94.3%-97.2%) of all trauma patients. In non-cardiac arrest patients, intubation was successful in the first attempt in 60.2% (95% CI, 55.8%-64.4%) and within 3 attempts in 94.5%

1  
2  
3 (95% CI, 92.1%-96.2%) of patients. In cardiac arrest patients, intubation was successful in the  
4 first attempt in 71.2% (95% CI, 65.1%-76.6%) and within 3 attempts in 99.2% (95% CI,  
5 97.0%-99.8%) of the patients. In the stratified analysis by the specialty (i.e., emergency  
6 physicians [n=434] vs. non-emergency physicians [n=289]), emergency physicians had a higher  
7 success at the first attempt (72.8 % vs. 50.2 %, p<0.001) compared to non-emergency physicians  
8 (including all transitional-year residents [n=237]). Intubation-associated adverse event rates were  
9 10.8% (95% CI, 8.7%-13.3%) in overall trauma patients, 11.5% (95% CI, 9.0%-14.6%) in  
10 non-cardiac arrest patients, and 9.3% (95% CI, 6.2%-13.7%) in cardiac arrest patients.  
11  
12  
13  
14  
15  
16  
17  
18  
19  
20  
21  
22  
23

24 At the ED-level, there was a wide variation in the methods of intubation across the 12 EDs  
25 (**Figure 2**). For example, RSI as the initial intubation method was performed in 0% to 50.9% of  
26 all trauma patients, and in 0% to 87.5% of non-cardiac arrest patients. Similarly, there was a  
27 wide variation in the success rates and adverse event rates across the EDs (**Figure 3**). The range  
28 of overall success rates for intubation in the first attempt ranged from 35.5% to 90.5%, and from  
29 85.1% to 100% within 3 attempts. Likewise, overall adverse event rates varied widely (range,  
30 0%-16.7%) across the EDs. These wide variations in intubation success rates and adverse event  
31 rates persisted across the non-cardiac arrest and cardiac arrest strata.  
32  
33  
34  
35  
36  
37  
38  
39  
40  
41  
42  
43  
44  
45  
46  
47  
48  
49  
50  
51  
52  
53  
54  
55  
56  
57  
58  
59  
60

**Table 3. Success rates and intubation-associated adverse events**

|                              | All trauma patients |      |               | Non-cardiac arrest patients |      |               | Cardiac arrest patients |      |               |
|------------------------------|---------------------|------|---------------|-----------------------------|------|---------------|-------------------------|------|---------------|
|                              | n                   | %    | 95% CI        | n                           | %    | 95% CI        | n                       | %    | 95% CI        |
| Successful in 1st attempt    | 461                 | 63.8 | (60.2 - 67.2) | 293                         | 60.2 | (55.8 - 64.4) | 168                     | 71.2 | (65.1 - 76.6) |
| Successful in ≤ 3rd attempts | 694                 | 96.0 | (94.3 - 97.2) | 460                         | 94.5 | (92.1 - 96.2) | 234                     | 99.2 | (97.0 - 99.8) |
| Adverse events               | 78                  | 10.8 | (8.7 - 13.3)  | 56                          | 11.5 | (9.0 - 14.6)  | 22                      | 9.3  | (6.2 - 13.7)  |
| Details of adverse events*   |                     |      |               |                             |      |               |                         |      |               |
| Esophageal intubation        | 25                  | 3.5  | (2.2 - 5.1)   | 15                          | 3.1  | (1.7 - 5.0)   | 10                      | 4.2  | (2.0 - 7.7)   |
| Mainstem bronchus intubation | 18                  | 2.5  | (1.5 - 3.9)   | 9                           | 1.8  | (0.8 - 3.5)   | 9                       | 3.8  | (1.7 - 7.1)   |
| Airway trauma                | 17                  | 2.4  | (1.4 - 3.7)   | 14                          | 2.9  | (1.6 - 4.8)   | 3                       | 1.3  | (0.3 - 3.7)   |
| Hypotension†                 | 8                   | 1.1  | (0.5 - 2.2)   | 8                           | 1.6  | (0.7 - 3.2)   |                         |      |               |
| Vomiting                     | 6                   | 0.8  | (0.3 - 1.8)   | 6                           | 1.2  | (0.5 - 2.7)   |                         |      |               |
| Hypoxia‡                     | 3                   | 0.4  | (0.1 - 1.2)   | 3                           | 0.6  | (0.1 - 1.8)   |                         |      |               |
| Cardiac arrest               | 1                   | 0.1  | (0.0 - 0.8)   | 1                           | 0.2  | (0.0 - 1.1)   |                         |      |               |

Abbreviations: CI, confidence interval

\*Patients may have more than 1 adverse event.

†Hypotension was defined as systolic blood pressure less than 90 mm Hg.

‡Hypoxia was defined as pulse oximetric oxygen saturation of less than 90% during intubation attempts, not as a result of esophageal intubation.

#### 4. DISCUSSION

In this prospective, multicenter, observational study in Japan, we observed an acceptable success rate of airway management in trauma patients in EDs. However, we also found a wide range of variation in the initial method of intubation, success rates, and adverse event rates during trauma airway management across the EDs. Indeed, the overall success rates in the first intubation attempt ranged from 35.5% to 90.5%.

We were struck by the high degree of variation in the methods of airway management in trauma cases across the 12 EDs. The reasons for the observed practice variations are unclear and are likely multifactorial. It is possible that non-RSI methods were attempted in patients who were predicted to have a difficult intubation. However, the difference in the patient population across the EDs cannot fully explain the observed three-fold difference in the use of RSI. Therefore, some of the patients might have been inappropriately considered as “difficult intubation,” and intubated with non-RSI methods. Alternatively, it is also plausible that non-RSI methods were more frequently used in certain EDs because of the physicians’ preference, procedural experiences, training background, or differences in ED staffing and institutional policies.

Our study also demonstrated a high degree of variations in success and adverse event rates among the EDs. Particularly, the success rate at first attempts was highly variable. To the best of our knowledge, this is the first study to demonstrate such inter-hospital variations in success and adverse event rates in trauma airway management in different EDs. The reasons for the variations among the EDs are likely multifactorial; the potential explanations include

1  
2  
3 inter-hospital differences in patient population, skills or education backgrounds of intubators,[15]  
4  
5 drug and device availability in the ED, or any combination of these factors. Alternatively, the  
6  
7  
8 observed wide variation in the intubation method may have led to these variations in success and  
9  
10 adverse event rates. Furthermore, there are no requirements for procedural credentials to perform  
11  
12 ED intubations both in individuals and institutions in Japan.[10] This lack of procedural  
13  
14 requirements would have contributed, at least partially, to the observed inter-hospital variations  
15  
16 in the success rates. Indeed, we observed that intubation success rates performed by  
17  
18 non-emergency physicians were significantly lower; this was, at least in part, explained by the  
19  
20 intubation attempts by transitional-year residents. However, it is well documented in the  
21  
22 literature that first-pass success is important in critically-ill patients[11]; therefore, the observed  
23  
24 lower success rate by these non-skilled physicians cannot be justified. Our data underscore the  
25  
26 reinforcement of Japanese methodology of training for non-skilled physicians (e.g., the use of  
27  
28 simulators and training in a more controlled setting[16-18] to improve their intubation skill set,  
29  
30 which will, in turn, improve patients' outcomes.  
31  
32  
33  
34  
35  
36  
37  
38

39 Although international and Japanese trauma care guidelines recommend the use of RSI as the  
40  
41 initial method of emergency airway management in most trauma patients,[14 5] the evidence for  
42  
43 accurately predicting patients in whom RSI should be avoided remain limited.[19 20] It is,  
44  
45 therefore, plausible that the scarcity of evidence may have contributed to the practice variations  
46  
47 across the EDs. Our observations should facilitate further investigation of any barriers to the  
48  
49 delivery of safer trauma care nationally. Additionally, building more robust evidence on trauma  
50  
51 airway management, coupled with improved dissemination of these findings, could decrease the  
52  
53 variations in trauma care across the EDs in Japan.  
54  
55  
56  
57  
58  
59  
60

1  
2  
3  
4  
5  
6 Our study has several potential limitations. First, this passive surveillance of the study data is  
7  
8 subject to self-reporting bias, leading to a possible underestimation of failed intubations and  
9  
10 adverse events. However, active independent monitoring of ED intubations is difficult to  
11  
12 accomplish. We did, however, use a self-reporting system with structured data forms, uniform  
13  
14 definitions, and a high capture rate. Second, we did not design this study to measure patient  
15  
16 outcomes, such as long-term mortality or morbidity. A more detailed analysis of adverse events  
17  
18 and outcomes requires following the patients for a longer period. Third, we did not account for  
19  
20 several potential confounders, such as severities (the Injury Severity Score, the Revised Trauma  
21  
22 Score, etc.) of cases and training levels of physicians. However, this prospective multicenter data  
23  
24 reflect the current airway management in the natural setting of a “real” population and current  
25  
26 clinical practice, therefore enhancing the potential generalizability of the findings. Finally, all  
27  
28 EDs in this study were designated as tertiary or academic general hospitals, and all but one of the  
29  
30 EDs were affiliated with an emergency medicine residency program in Japan. Therefore, our  
31  
32 inferences may not be generalizable to trauma airway management in non-academic EDs or other  
33  
34 developed nations. These observations, however, are highly relevant from a policy standpoint. As  
35  
36 these EDs provide advanced care for trauma victims and train the majority of emergency  
37  
38 physicians, these EDs have a disproportionate impact on current and future trauma care in EDs.  
39  
40  
41  
42  
43  
44  
45  
46  
47

## 48 **5. CONCLUSION**

49  
50 In this multicenter prospective study of emergency airway management in Japan, we found an  
51  
52 acceptable overall success rate in trauma airway management. However, we also found that the  
53  
54 method of intubation, success rates and adverse event rates were highly variable among EDs. For  
55  
56  
57  
58  
59  
60



1  
2  
3 researchers, our observations should facilitate further investigations to identify the reasons of the  
4  
5 inter-hospital variations. Additionally, for policy makers and professional organizations, our  
6  
7 findings suggest that development and dissemination of nationwide protocols are warranted to  
8  
9 achieve safer airway management for trauma victims in Japan.  
10  
11  
12  
13  
14  
15  
16  
17  
18  
19  
20  
21  
22  
23  
24  
25  
26  
27  
28  
29  
30  
31  
32  
33  
34  
35  
36  
37  
38  
39  
40  
41  
42  
43  
44  
45  
46  
47  
48  
49  
50  
51  
52  
53  
54  
55  
56  
57  
58  
59  
60

For peer review only

## Acknowledgments

The authors acknowledge the following research personnel at the study hospitals for their assistance with this project: Fukui University Hospital (Hideya Nagai, MD, Hiroshi Morita MD); Fukui Prefectural Hospital (Yukinori Kato, MD, Hidenori Higashi, MD); Japanese Red Cross Medical Center of Wakayama (Hiroshi Okamoto, MD); Kameda Medical Center (Kenzo Tanaka, MD); National Center for Global Health and Medicine (Taigo Sakamoto, MD, Shunichiro Nakao, MD); Nagoya Ekisaikai Hospital (Yukari Goto, MD); Niigata City General Hospital (Nobuhiro Sato, MD, MPH); Obama Municipal Hospital (Takuyo Chiba, MD); Okinawa Chubu Prefectural Hospital (Masashi Okubo, MD); Osaka Saiseikai Senri Hospital (Kazuaki Shigemitsu, MD); and Shonan Kamakura General Hospital (Taichi Imamura, MD); Kurashiki Central Hospital (Hiroshi Okamoto, MD); and St. Marianna University School of Medicine Hospital (Yasuaki Koyama, MD).

Finally, we are grateful to our many emergency physicians and residents for their perseverance in pursuing new knowledge about this vital resuscitative procedure.

## Author Contribution

K.H. designed the study, for which S.N. and Y.H. contributed to the data collection and analysis.

S.N. wrote the manuscript, which A.K. reviewed.

## Data Sharing Statement

No additional data available

## References

1. American College of Surgeons CoT. *Advanced Trauma Life Support for Doctors, Student Course Manual*. 8th ed. Chicago, IL, 2008.
2. Walls RM, Brown CA, 3rd, Bair AE, et al. Emergency airway management: a multi-center report of 8937 emergency department intubations. *The Journal of emergency medicine* 2011;**41**(4):347-54 doi: 10.1016/j.jemermed.2010.02.024[published Online First: Epub Date]].
3. Hussain LM, Redmond AD. Are pre-hospital deaths from accidental injury preventable? *Bmj* 1994;**308**(6936):1077-80 doi: 10.1136/bmj.308.6936.1077[published Online First: Epub Date]].
4. *Japan Advanced Trauma Evaluation and Care (JATEC™) guideline*. 3rd edition ed, 2008.
5. Dunham CM, Barraco RD, Clark DE, et al. Guidelines for emergency tracheal intubation immediately after traumatic injury. *The Journal of trauma* 2003;**55**(1):162-79 doi: 10.1097/01.ta.0000083335.93868.2c[published Online First: Epub Date]].
6. Graham CA. Emergency department airway management in the UK. *Journal of the Royal Society of Medicine* 2005;**98**(3):107-10 doi: 10.1258/jrsm.98.3.107[published Online First: Epub Date]].
7. Sakles JC, Laurin EG, Rantapaa AA, et al. Airway management in the emergency department: a one-year study of 610 tracheal intubations. *Annals of emergency medicine* 1998;**31**(3):325-32 doi: 10.1016/S0196-0644(98)70342-7[published Online First: Epub Date]].
8. Sagarin MJ, Barton ED, Chng YM, et al. Airway management by US and Canadian emergency medicine residents: a multicenter analysis of more than 6,000 endotracheal

- 1  
2  
3 intubation attempts. *Annals of emergency medicine* 2005;**46**(4):328-36 doi:  
4  
5 10.1016/j.annemergmed.2005.01.009[published Online First: Epub Date]].  
6  
7  
8 9. Graham CA, Beard D, Henry JM, et al. Rapid sequence intubation of trauma patients in  
9  
10 Scotland. *The Journal of trauma* 2004;**56**(5):1123-6 doi:  
11  
12 10.1097/01.TA.0000109066.62811.8A[published Online First: Epub Date]].  
13  
14  
15 10. Hasegawa K, Hagiwara Y, Chiba T, et al. Emergency airway management in Japan:  
16  
17 Interim analysis of a multi-center prospective observational study. *Resuscitation*  
18  
19 2012;**83**(4):428-33 doi: 10.1016/j.resuscitation.2011.11.027[published Online First: Epub  
20  
21 Date]].  
22  
23  
24 11. Hasegawa K, Shigemitsu K, Hagiwara Y, et al. Association between repeated intubation  
25  
26 attempts and adverse events in emergency departments: an analysis of a multicenter  
27  
28 prospective observational study. *Annals of emergency medicine* 2012;**60**(6):749-54 e2  
29  
30 doi: 10.1016/j.annemergmed.2012.04.005[published Online First: Epub Date]].  
31  
32  
33  
34 12. Imamura T, Brown CA, 3rd, Ofuchi H, et al. Emergency airway management in geriatric  
35  
36 and younger patients: analysis of a multicenter prospective observational study. *The*  
37  
38 *American journal of emergency medicine* 2013;**31**(1):190-6 doi:  
39  
40 10.1016/j.ajem.2012.07.008[published Online First: Epub Date]].  
41  
42  
43  
44 13. Hasegawa K, Hagiwara Y, Imamura T, et al. Increased incidence of hypotension in  
45  
46 elderly patients who underwent emergency airway management: an analysis of a  
47  
48 multi-centre prospective observational study. *International journal of emergency*  
49  
50 *medicine* 2013;**6**(1):12 doi: 10.1186/1865-1380-6-12[published Online First: Epub  
51  
52 Date]].  
53  
54  
55  
56 14. Hospital Intelligence Agency. Secondary Hospital Intelligence Agency. <http://hospia.jp/>.  
57  
58  
59  
60

- 1  
2  
3  
4  
5  
6  
7  
8  
9  
10  
11  
12  
13  
14  
15  
16  
17  
18  
19  
20  
21  
22  
23  
24  
25  
26  
27  
28  
29  
30  
31  
32  
33  
34  
35  
36  
37  
38  
39  
40  
41  
42  
43  
44  
45  
46  
47  
48  
49  
50  
51  
52  
53  
54  
55  
56  
57  
58  
59  
60
15. Graham CA, Beard D, Oglesby AJ, et al. Rapid sequence intubation in Scottish urban emergency departments. *Emergency medicine journal : EMJ* 2003;**20**(1):3-5
  16. Mayo PH, Hackney JE, Mueck JT, et al. Achieving house staff competence in emergency airway management: results of a teaching program using a computerized patient simulator. *Critical care medicine* 2004;**32**(12):2422-7
  17. Cook DA, Hatala R, Brydges R, et al. Technology-enhanced simulation for health professions education: a systematic review and meta-analysis. *JAMA : the journal of the American Medical Association* 2011;**306**(9):978-88 doi: 10.1001/jama.2011.1234[published Online First: Epub Date].
  18. Bernhard M, Mohr S, Weigand MA, et al. Developing the skill of endotracheal intubation: implication for emergency medicine. *Acta anaesthesiologica Scandinavica* 2012;**56**(2):164-71 doi: 10.1111/j.1399-6576.2011.02547.x[published Online First: Epub Date].
  19. Reed MJ, Dunn MJ, McKeown DW. Can an airway assessment score predict difficulty at intubation in the emergency department? *Emergency medicine journal : EMJ* 2005;**22**(2):99-102 doi: 10.1136/emj.2003.008771[published Online First: Epub Date].
  20. Soyuncu S, Eken C, Cete Y, et al. Determination of difficult intubation in the ED. *The American journal of emergency medicine* 2009;**27**(8):905-10 doi: 10.1016/j.ajem.2008.07.003[published Online First: Epub Date].

## Figure Legends

### Figure 1. Flow chart showing inclusion of patients in this study

### Figure 2. Inter-hospital variations in initial methods of intubation

Boxplots of inter-hospital variations in the initial methods of intubation. The line in the middle of the box represents the median, with the lower and upper limits of the box representing the 25th and 75th percentiles, respectively. The whiskers from the box extend to the minimum and maximum values.

### Figure 3. Inter-hospital variations in success rates and adverse event rates

Boxplots of inter-hospital variations in success rates and adverse event rates. The line in the middle of the box represents the median, with the lower and upper limits of the box representing the 25th and 75th percentiles. The whiskers from the box extend to the minimum and maximum values.

1  
2  
3 **Trauma airway management in emergency departments: A multicenter, prospective,**  
4  
5 **observational study in Japan**  
6  
7  
8  
9

10 Shunichiro Nakao, MD<sup>1</sup>; Akio Kimura, MD, PhD<sup>1</sup>; Yusuke Hagiwara, MD, MPH<sup>2</sup>; and Kohei  
11 Hasegawa, MD, MPH<sup>3</sup>, on behalf of the Japanese Emergency Medicine Network Investigators  
12  
13  
14

15  
16  
17 <sup>1</sup>Department of Emergency Medicine and Critical Care, National Center for Global Health and  
18 Medicine, Shinjuku, Tokyo, Japan; <sup>2</sup>Department of Emergency Medicine, Tokyo Metropolitan  
19 Children's Medical Center, Fuchu, Tokyo, Japan; <sup>3</sup>Department of Emergency Medicine,  
20 Massachusetts General Hospital, Harvard Medical School, Boston, Massachusetts, the United  
21 States  
22  
23  
24  
25  
26  
27  
28  
29  
30  
31

32 **Address correspondence to:** Dr. Shunichiro Nakao  
33

34 Department of Emergency Medicine, University of Ottawa / The Ottawa Hospital - Civic  
35 Campus, 1053 Carling Ave, Room F653, Ottawa, ON K1Y 4E9  
36  
37

38 Tel: 613.798.5555 ext. 15976  
39

40 Email: shunichiro-nakao@umin.ac.jp  
41  
42  
43  
44  
45

46 **Co-authors' address**  
47

48 Akio Kimura, MD, PhD; 1-21-1, Toyama, Shinjuku, Tokyo, Japan, Tel: + 81332027181, Email:  
49

50 akimura@hosp.ncgm.go.jp  
51

52 Yusuke Hagiwara, MD, MPH; 304 Keyaki-ryo, 2-9-2 Musashidai, Fuchu, Tokyo, Japan, Tel:  
53

54 +810423005111, Email: yusukehagiwara-tky@umin.ac.jp  
55  
56  
57  
58  
59  
60

1  
2  
3 Kohei Hasegawa, MD, MPH; 326 Cambridge Street, Suite 410, Boston, Tel: 6177245276, Email:  
4  
5 khasegawa1@partners.org  
6  
7  
8  
9  
10  
11

12 **Financial Disclosure:** This study was supported by a grant from St. Luke's Life Science Institute  
13 and a grant from Massachusetts General Hospital and Brigham and Women's Hospital. The study  
14 sponsors have no involvement in designing the study, in the collection, analysis and  
15 interpretation of data, in the writing of the manuscript, and in the decision to submit the  
16 manuscript for publication.  
17  
18  
19  
20  
21  
22  
23  
24  
25  
26

27 **Conflict of Interest:** None of the authors have any conflict of interest to declare.  
28  
29  
30  
31

32 **Keywords:** Airway management, intubation, emergency department, practice variation, rapid  
33 sequence intubation  
34  
35  
36  
37  
38  
39  
40  
41  
42  
43  
44  
45  
46  
47  
48  
49  
50  
51  
52  
53  
54  
55  
56  
57  
58  
59  
60



## Abstract

Objectives: Although successful airway management is essential for emergency trauma care, comprehensive studies are limited. We sought to characterize the current trauma care practice of airway management in the emergency departments (EDs) in Japan.

Design: Analysis of data from a prospective, observational, multi-center registry – the Japanese Emergency Airway Network (JEAN) registry.

Setting: 13 academic and community EDs from different geographic regions across Japan.

Participants: 723 trauma patients who underwent emergency intubation from March 2010 through August 2012.

Outcome measures: ED characteristics, patient and operator demographics, methods of airway management, intubation success or failure at each attempt, and adverse events.

Results: A total of 723 trauma patients who underwent emergency intubation were eligible for the analysis. Traumatic cardiac arrest comprised 32.6% (95% CI, 29.3%-36.1%) of patients.

Rapid sequence intubation (RSI) was the initial method chosen in 23.9% (95% CI, 21.0%-27.2%) of all trauma patients, and in 35.5% (95% CI, 31.4%-39.9%) of non-cardiac arrest trauma patients. Overall, intubation was successful in  $\leq 3$  attempts in 96.0% of patients (95% CI, 94.3%-97.2%). There was a wide variation in the initial methods of intubation; RSI as the initial method was performed in 0% to 50.9% of all trauma patients among 12 EDs. Similarly, there was a wide variation in success rates and adverse event rates across the EDs. Success rates varied between 35.5% and 90.5% at the first attempt and 85.1% and 100% within 3 attempts across the 12 EDs.

1  
2  
3  
4  
5  
6 Conclusion: In this multicenter prospective study in Japan, we observed a high overall success  
7  
8 rate in airway management during trauma care. However, the methods of intubation and success  
9  
10 rates were highly variable among hospitals.  
11  
12  
13  
14  
15  
16  
17  
18  
19  
20  
21  
22  
23  
24  
25  
26  
27  
28  
29  
30  
31  
32  
33  
34  
35  
36  
37  
38  
39  
40  
41  
42  
43  
44  
45  
46  
47  
48  
49  
50  
51  
52  
53  
54  
55  
56  
57  
58  
59  
60

**Article summary****Article focus**

This paper characterizes the current practice of airway management for trauma patients in emergency departments (EDs) in Japan by using data from the Japanese Emergency Airway Network (JEAN) Study.

**Key messages**

The method of intubation, success rates, and adverse event rates are highly variable among EDs. Development and dissemination of nationwide protocols are warranted to achieve safer airway management for trauma victims in Japan.

**Strengths and limitations of this study**

This is the first study to report disparities in trauma airway management based on multicenter, prospective data.

Passive surveillance of data is subject to self-reporting bias, leading to a possible underestimation of failed intubations and adverse events.

## 1. INTRODUCTION

Successful airway management is a cornerstone in the modern practice of emergency and trauma care. Failure of emergency airway management is often associated with morbidity and mortality in trauma patients.[1-3] Consequently, training in and understanding of airway management is a distinct discipline that is essential for successful trauma resuscitation.

Evidence-based recommendations for airway management during trauma care exist within international and national guidelines of the United States. These guidelines indicate rapid sequence intubation (RSI) as the initial method of emergency airway management in most trauma patients.[1 4 5] Recent studies reported that RSI is the most common airway management method in emergency departments (EDs) in North America and Europe.[6-9] Despite the ubiquitous practice of emergency airway management in trauma patients, little is known about its current practice and performance in other industrialized nations. Therefore, we sought to describe the current practice of airway management for trauma patients in the EDs in Japan.

## 2. METHODS

### Study Design and Setting

We analyzed the data of a prospective, observational, multi-center registry, the Japanese Emergency Airway Network (JEAN) registry. The study design, setting, methods of measurement, and measured variables have been reported elsewhere.[10-13] Briefly, the registry is a consortium of 13 academic and community EDs from different geographic regions across Japan. These EDs consisted of 10 tertiary medical centers that have a capability to manage the most severe trauma patients and 3 secondary medical centers that are designated to treat moderately severe trauma patients. The participating EDs had a median ED census of 30,000 patient visits per year (range 9,000 to 67,000). **The participating hospitals had a median trauma admission of 1,000 per year (range, 300 to 1,500).[14]** All 13 EDs were staffed by attending emergency physicians, and 12 had affiliations with emergency medicine residency training programs. Each hospital maintained individual protocols, policies, and procedures for emergency airway management. Intubations were performed by attending physicians or by resident physicians at the discretion of the ED attending physician. The ethics committee of each participating center approved the protocol, with waiver of informed consent before data collection.

### Patients

The registry prospectively collected information on consecutive patients who underwent airway management in the participating EDs during a 30-month period, from March 2010 to August 2012. All adult and pediatric trauma patients who underwent intubation were eligible for this

1  
2  
3 analysis. We excluded an ED in which the number of trauma intubations was less than 10 from  
4  
5 the current analysis.  
6  
7  
8  
9

## 10 **Data Collection**

11  
12 Data collection was passive, relying on self-reports by the intubators on duty. After each  
13  
14 intubation, the intubators completed a standardized data sheet, including the patient's age, sex,  
15  
16 estimated weight, primary indication for intubation, methods used to facilitate intubation,  
17  
18 intubator's level of training (emergency physicians, resident physicians, and transitional year  
19  
20 residents) and specialty (emergency physician or not), number of attempts, success or failure,  
21  
22 and intubation-related adverse events. Method was defined as the set of medications and devices  
23  
24 used, such as RSI with a Macintosh laryngoscope. Transitional-years residents were  
25  
26 post-graduate year 1-2 physicians who rotate through the ED. An intubation attempt was defined  
27  
28 as a single insertion of the laryngoscope (or other device) past the teeth.[2 10-13] For nasal  
29  
30 intubations, an attempt was defined as a single insertion of a tracheal tube past the turbinates. An  
31  
32 attempt was successful if it resulted in the tracheal tube being passed through the vocal cords.  
33  
34 One or more methods could be used in each patient, and each method could be attempted several  
35  
36 times.  
37  
38  
39  
40  
41  
42  
43  
44  
45

46 Adverse events were recorded using a pre-specified list, with the option to include additional  
47  
48 comments, if necessary. Adverse events were defined as cardiac arrest, hypotension, hypoxemia,  
49  
50 dysrhythmia, vomiting, esophageal intubation, mainstem bronchial intubation, and airway  
51  
52 trauma that are considered to be intubation-related.[11] Cardiac arrest included asystole,  
53  
54 bradycardia, or dysrhythmia with nonmeasurable blood pressure and cardiopulmonary  
55  
56  
57  
58  
59  
60

1  
2  
3 resuscitation during or after intubation. Hypotension was defined as systolic blood pressure less  
4  
5 than 90 mm Hg. Hypoxemia was defined as pulse oximetric saturation less than 90% during an  
6  
7 intubation attempt, not a result of esophageal intubation. Preexisting hypotension or hypoxemia  
8  
9 before an intubation attempt were not counted as an adverse event. Esophageal intubation was  
10  
11 defined as misplacement of the endotracheal tube in the upper esophagus or hypopharynx, with a  
12  
13 lapse of time and desaturation (pulse oximetric saturation <90%) before the removal of the  
14  
15 misplaced tube. We monitored compliance with data form completion by reviewing professional  
16  
17 billing records. Where the data collection form was missing, the intubator was interviewed by  
18  
19 one of the investigators within 2 weeks of the patient encounter, to fill out the data form.  
20  
21  
22  
23  
24  
25  
26

27 The outcomes of interest were the primary indication for intubation, initial method used for  
28  
29 intubation, intubation success rates (on the first attempt and within three attempts), and  
30  
31 intubation-related adverse event rates.  
32  
33  
34  
35

### 36 **Statistical Analysis**

37  
38 We performed all analysis with JMP 10 software (SAS Institute Inc., Cary, NC, USA). At the  
39  
40 patient-level, we described patient demographics, the primary indication for intubation, initial  
41  
42 method of intubation, success rates, and adverse event rates as proportions with 95% confidence  
43  
44 intervals (CIs) and medians with interquartile ranges (IQR). Then, at the ED-level, we described  
45  
46 medians, IQR and ranges for each outcome for all trauma patients. We also repeated the analysis  
47  
48 after stratifying by indication (non-cardiac arrest vs. cardiac arrest) and specialty (emergency  
49  
50 physicians vs. non-emergency physicians). All *P*-values were two-tailed, with *P*<0.05 considered  
51  
52 statistically significant.  
53  
54  
55  
56  
57  
58  
59  
60

### 3. RESULTS

During the 30-month study period, 4,268 patients required emergency airway management. Of these, the registry recorded 4,094 intubations (capture rate, 95.9%; **Figure 1**), of which 3370 patients who underwent airway management for medical reasons were excluded from the analysis. One of the 13 hospitals, in whom only 1 trauma patient required airway intervention during the study period, was excluded because the number of intubations for trauma care was less than 10 during the study period. Hence, 723 trauma patients were eligible for analysis.

Emergency physicians, including emergency medicine residents, performed the first intubation attempts in 60.0% (95% CI, 56.4%-63.5%) of all trauma patients and 66.7% (95% CI, 62.4%-70.8%) of non-cardiac arrest patients. Transitional-year residents (postgraduate years 1 and 2) performed the first intubation attempts in 31.4% (95% CI, 28.1%-34.9%) of all trauma patients and 25.7% (95% CI, 22.0%-29.7%) of non-cardiac arrest patients.

**Table 1** shows the baseline characteristics and primary indications in patients who required trauma airway management. Median age was 56 years; two-thirds of the patients were male. Traumatic cardiac arrest was the reason for intubation in 32.6% (95% CI, 29.3%-36.1%) of all trauma patients, while head trauma accounted for 30.4% (95% CI, 27.2%-33.9%). **Table 2** shows the initial method of airway management in the trauma patients. RSI was the initial method chosen in 23.9% (95% CI, 21.0%-27.2%) of all trauma patients and 35.5% (95% CI, 31.4%-39.9%) of non-cardiac arrest patients. Cricothyrotomy was performed as the initial airway management strategy in 2.2% (95% CI, 1.4%-3.6%) of all trauma patients and 0.4% (95% CI, 0.1%-1.5%) of non-cardiac arrest patients. The direct laryngoscope was used in most of intubations (n=654, 90.5%), and the remaining were intubated using a video laryngoscope (n=30,



4.1%), a bronchoscope (n=17, 2.4%), a lighted stylet (n=1, 0.1%) on the first attempt.

**Table 1. Characteristics of the 723 trauma patients who required intubation**

| Patient characteristics               |      |               |
|---------------------------------------|------|---------------|
| Age (y), median, (IQR)                | 56   | (34 - 73)     |
| Male, % (95% CI)                      | 66.9 | (63.4 - 70.3) |
| Estimated weight (kg), median, (IQR)  | 60   | (50 - 70)     |
| Indication for intubation, % (95% CI) |      |               |
| Cardiac arrest                        | 32.6 | (29.3 - 36.1) |
| Head trauma                           | 30.4 | (27.2 - 33.9) |
| Shock                                 | 16.6 | (14.1 - 19.5) |
| Facial/Neck trauma                    | 8.4  | (6.6 - 10.7)  |
| Airway burn                           | 6.8  | (5.2 - 8.8)   |
| Others                                | 5.1  | (3.3 - 8.0)   |

Abbreviations: CI, confidence interval; IQR, interquartile range

**Table 2. Initial method of intubation**

|                             | All trauma patients |      |               | Non-cardiac arrest patients |      |               |
|-----------------------------|---------------------|------|---------------|-----------------------------|------|---------------|
|                             | n                   | %    | 95% CI        | n                           | %    | 95% CI        |
| Rapid sequence intubation   | 173                 | 23.9 | (21.0 - 27.2) | 173                         | 35.5 | (31.4 - 39.9) |
| Sedation without paralysis  | 153                 | 21.2 | (18.3 - 24.3) | 153                         | 31.4 | (27.5 - 35.7) |
| Paralytics without sedation | 19                  | 2.6  | (1.7 - 4.1)   | 19                          | 3.9  | (2.5 - 6.0)   |
| Oral without sedation       | 349                 | 48.3 | (44.6 - 52.0) | 127                         | 26.1 | (22.4 - 30.2) |
| Surgical                    | 16                  | 2.2  | (1.4 - 3.6)   | 2                           | 0.4  | (0.1 - 1.5)   |
| Nasal intubation            | 13                  | 1.8  | (1.1 - 3.1)   | 13                          | 2.7  | (1.6 - 4.5)   |
| Total                       | 723                 | 100  |               | 487                         | 100  |               |

Abbreviations: CI, confidence interval

**Table 3** summarizes the intubation success rates and adverse event rates. Overall, intubation was successful in the first attempt in 63.8% (95% CI, 60.2%-67.2%) and within 3 attempts in 96.0% (95% CI, 94.3%-97.2%) of all trauma patients. In non-cardiac arrest patients, intubation was successful in the first attempt in 60.2% (95% CI, 55.8%-64.4%) and within 3 attempts in 94.5%

1  
2  
3 (95% CI, 92.1%-96.2%) of patients. In cardiac arrest patients, intubation was successful in the  
4 first attempt in 71.2% (95% CI, 65.1%-76.6%) and within 3 attempts in 99.2% (95% CI,  
5 97.0%-99.8%) of the patients. In the stratified analysis by the specialty (i.e., emergency  
6 physicians [n=434] vs. non-emergency physicians [n=289]), emergency physicians had a higher  
7 success at the first attempt (72.8 % vs. 50.2 %, p<0.001) compared to non-emergency physicians  
8 (including all transitional-year residents [n=237]). Intubation-associated adverse event rates were  
9 10.8% (95% CI, 8.7%-13.3%) in overall trauma patients, 11.5% (95% CI, 9.0%-14.6%) in  
10 non-cardiac arrest patients, and 9.3% (95% CI, 6.2%-13.7%) in cardiac arrest patients.  
11  
12  
13  
14  
15  
16  
17  
18  
19  
20  
21  
22  
23  
24

25 At the ED-level, there was a wide variation in the methods of intubation across the 12 EDs  
26 (**Figure 2**). For example, RSI as the initial intubation method was performed in 0% to 50.9% of  
27 all trauma patients, and in 0% to 87.5% of non-cardiac arrest patients. Similarly, there was a  
28 wide variation in the success rates and adverse event rates across the EDs (**Figure 3**). The range  
29 of overall success rates for intubation in the first attempt ranged from 35.5% to 90.5%, and from  
30 85.1% to 100% within 3 attempts. Likewise, overall adverse event rates varied widely (range,  
31 0%-16.7%) across the EDs. These wide variations in intubation success rates and adverse event  
32 rates persisted across the non-cardiac arrest and cardiac arrest strata.  
33  
34  
35  
36  
37  
38  
39  
40  
41  
42  
43  
44  
45  
46  
47  
48  
49  
50  
51  
52  
53  
54  
55  
56  
57  
58  
59  
60

**Table 3. Success rates and intubation-associated adverse events**

|                              | All trauma patients |      |               | Non-cardiac arrest patients |      |               | Cardiac arrest patients |      |               |
|------------------------------|---------------------|------|---------------|-----------------------------|------|---------------|-------------------------|------|---------------|
|                              | n                   | %    | 95% CI        | n                           | %    | 95% CI        | n                       | %    | 95% CI        |
| Successful in 1st attempt    | 461                 | 63.8 | (60.2 - 67.2) | 293                         | 60.2 | (55.8 - 64.4) | 168                     | 71.2 | (65.1 - 76.6) |
| Successful in ≤ 3rd attempts | 694                 | 96.0 | (94.3 - 97.2) | 460                         | 94.5 | (92.1 - 96.2) | 234                     | 99.2 | (97.0 - 99.8) |
| Adverse events               | 78                  | 10.8 | (8.7 - 13.3)  | 56                          | 11.5 | (9.0 - 14.6)  | 22                      | 9.3  | (6.2 - 13.7)  |
| Details of adverse events*   |                     |      |               |                             |      |               |                         |      |               |
| Esophageal intubation        | 25                  | 3.5  | (2.2 - 5.1)   | 15                          | 3.1  | (1.7 - 5.0)   | 10                      | 4.2  | (2.0 - 7.7)   |
| Mainstem bronchus intubation | 18                  | 2.5  | (1.5 - 3.9)   | 9                           | 1.8  | (0.8 - 3.5)   | 9                       | 3.8  | (1.7 - 7.1)   |
| Airway trauma                | 17                  | 2.4  | (1.4 - 3.7)   | 14                          | 2.9  | (1.6 - 4.8)   | 3                       | 1.3  | (0.3 - 3.7)   |
| Hypotension†                 | 8                   | 1.1  | (0.5 - 2.2)   | 8                           | 1.6  | (0.7 - 3.2)   |                         |      |               |
| Vomiting                     | 6                   | 0.8  | (0.3 - 1.8)   | 6                           | 1.2  | (0.5 - 2.7)   |                         |      |               |
| Hypoxia‡                     | 3                   | 0.4  | (0.1 - 1.2)   | 3                           | 0.6  | (0.1 - 1.8)   |                         |      |               |
| Cardiac arrest               | 1                   | 0.1  | (0.0 - 0.8)   | 1                           | 0.2  | (0.0 - 1.1)   |                         |      |               |

Abbreviations: CI, confidence interval

\*Patients may have more than 1 adverse event.

†Hypotension was defined as systolic blood pressure less than 90 mm Hg.

‡Hypoxia was defined as pulse oximetric oxygen saturation of less than 90% during intubation attempts, not as a result of esophageal intubation.

#### 4. DISCUSSION

In this prospective, multicenter, observational study in Japan, we observed an acceptable success rate of airway management in trauma patients in EDs. However, we also found a wide range of variation in the initial method of intubation, success rates, and adverse event rates during trauma airway management across the EDs. Indeed, the overall success rates in the first intubation attempt ranged from 35.5% to 90.5%.

We were struck by the high degree of variation in the methods of airway management in trauma cases across the 12 EDs. The reasons for the observed practice variations are unclear and are likely multifactorial. It is possible that non-RSI methods were attempted in patients who were predicted to have a difficult intubation. However, the difference in the patient population across the EDs cannot fully explain the observed three-fold difference in the use of RSI. Therefore, some of the patients might have been inappropriately considered as “difficult intubation,” and intubated with non-RSI methods. Alternatively, it is also plausible that non-RSI methods were more frequently used in certain EDs because of the physicians’ preference, procedural experiences, training background, or differences in ED staffing and institutional policies.

Our study also demonstrated a high degree of variations in success and adverse event rates among the EDs. Particularly, the success rate at first attempts was highly variable. To the best of our knowledge, this is the first study to demonstrate such inter-hospital variations in success and adverse event rates in trauma airway management in different EDs. The reasons for the variations among the EDs are likely multifactorial; the potential explanations include

1  
2  
3 inter-hospital differences in patient population, skills or education backgrounds of intubators,[15]  
4  
5 drug and device availability in the ED, or any combination of these factors. Alternatively, the  
6  
7 observed wide variation in the intubation method may have led to these variations in success and  
8  
9 adverse event rates. Furthermore, there are no requirements for procedural credentials to perform  
10  
11 ED intubations both in individuals and institutions in Japan.[10] This lack of procedural  
12  
13 requirements would have contributed, at least partially, to the observed inter-hospital variations  
14  
15 in the success rates. Indeed, we observed that intubation success rates performed by  
16  
17 non-emergency physicians were significantly lower; this was, at least in part, explained by the  
18  
19 intubation attempts by transitional-year residents. However, it is well documented in the  
20  
21 literature that first-pass success is important in critically-ill patients[11]; therefore, the observed  
22  
23 lower success rate by these non-skilled physicians cannot be justified. Our data underscore the  
24  
25 reinforcement of Japanese methodology of training for non-skilled physicians (e.g., the use of  
26  
27 simulators and training in a more controlled setting[16-18] to improve their intubation skill set,  
28  
29 which will, in turn, improve patients' outcomes.  
30  
31  
32  
33  
34  
35  
36  
37  
38

39 Although international and Japanese trauma care guidelines recommend the use of RSI as the  
40  
41 initial method of emergency airway management in most trauma patients,[14 5] the evidence for  
42  
43 accurately predicting patients in whom RSI should be avoided remain limited.[19 20] It is,  
44  
45 therefore, plausible that the scarcity of evidence may have contributed to the practice variations  
46  
47 across the EDs. Our observations should facilitate further investigation of any barriers to the  
48  
49 delivery of safer trauma care nationally. Additionally, building more robust evidence on trauma  
50  
51 airway management, coupled with improved dissemination of these findings, could decrease the  
52  
53 variations in trauma care across the EDs in Japan.  
54  
55  
56  
57  
58  
59  
60

1  
2  
3  
4  
5  
6 Our study has several potential limitations. First, this passive surveillance of the study data is  
7  
8 subject to self-reporting bias, leading to a possible underestimation of failed intubations and  
9  
10 adverse events. However, active independent monitoring of ED intubations is difficult to  
11  
12 accomplish. We did, however, use a self-reporting system with structured data forms, uniform  
13  
14 definitions, and a high capture rate. Second, we did not design this study to measure patient  
15  
16 outcomes, such as long-term mortality or morbidity. A more detailed analysis of adverse events  
17  
18 and outcomes requires following the patients for a longer period. Third, we did not account for  
19  
20 several potential confounders, such as severities (the Injury Severity Score, the Revised Trauma  
21  
22 Score, etc.) of cases and training levels of physicians. However, this prospective multicenter data  
23  
24 reflect the current airway management in the natural setting of a “real” population and current  
25  
26 clinical practice, therefore enhancing the potential generalizability of the findings. Finally, all  
27  
28 EDs in this study were designated as tertiary or academic general hospitals, and all but one of the  
29  
30 EDs were affiliated with an emergency medicine residency program in Japan. Therefore, our  
31  
32 inferences may not be generalizable to trauma airway management in non-academic EDs or other  
33  
34 developed nations. These observations, however, are highly relevant from a policy standpoint. As  
35  
36 these EDs provide advanced care for trauma victims and train the majority of emergency  
37  
38 physicians, these EDs have a disproportionate impact on current and future trauma care in EDs.  
39  
40  
41  
42  
43  
44  
45  
46  
47

## 48 **5. CONCLUSION**

49  
50 In this multicenter prospective study of emergency airway management in Japan, we found an  
51  
52 acceptable overall success rate in trauma airway management. However, we also found that the  
53  
54 method of intubation, success rates and adverse event rates were highly variable among EDs. For  
55  
56  
57  
58  
59  
60

1  
2  
3 researchers, our observations should facilitate further investigations to identify the reasons of the  
4  
5 inter-hospital variations. Additionally, for policy makers and professional organizations, our  
6  
7 findings suggest that development and dissemination of nationwide protocols are warranted to  
8  
9 achieve safer airway management for trauma victims in Japan.  
10  
11  
12  
13  
14  
15  
16  
17  
18  
19  
20  
21  
22  
23  
24  
25  
26  
27  
28  
29  
30  
31  
32  
33  
34  
35  
36  
37  
38  
39  
40  
41  
42  
43  
44  
45  
46  
47  
48  
49  
50  
51  
52  
53  
54  
55  
56  
57  
58  
59  
60

For peer review only

## Acknowledgments

The authors acknowledge the following research personnel at the study hospitals for their assistance with this project: Fukui University Hospital (Hideya Nagai, MD, Hiroshi Morita MD); Fukui Prefectural Hospital (Yukinori Kato, MD, Hidenori Higashi, MD); Japanese Red Cross Medical Center of Wakayama (Hiroshi Okamoto, MD); Kameda Medical Center (Kenzo Tanaka, MD); National Center for Global Health and Medicine (Taigo Sakamoto, MD, Shunichiro Nakao, MD); Nagoya Ekisaikai Hospital (Yukari Goto, MD); Niigata City General Hospital (Nobuhiro Sato, MD, MPH); Obama Municipal Hospital (Takuyo Chiba, MD); Okinawa Chubu Prefectural Hospital (Masashi Okubo, MD); Osaka Saiseikai Senri Hospital (Kazuaki Shigemitsu, MD); and Shonan Kamakura General Hospital (Taichi Imamura, MD); Kurashiki Central Hospital (Hiroshi Okamoto, MD); and St. Marianna University School of Medicine Hospital (Yasuaki Koyama, MD).

Finally, we are grateful to our many emergency physicians and residents for their perseverance in pursuing new knowledge about this vital resuscitative procedure.

## Author Contribution

K.H. designed the study, for which S.N. and Y.H. contributed to the data collection and analysis.

S.N. wrote the manuscript, which A.K. reviewed.

## Data Sharing Statement

No additional data available



## References

1. American College of Surgeons CoT. *Advanced Trauma Life Support for Doctors, Student Course Manual*. 8th ed. Chicago, IL, 2008.
2. Walls RM, Brown CA, 3rd, Bair AE, et al. Emergency airway management: a multi-center report of 8937 emergency department intubations. *The Journal of emergency medicine* 2011;41:347-54 doi: 10.1016/j.jemermed.2010.02.024.
3. Hussain LM, Redmond AD. Are pre-hospital deaths from accidental injury preventable? *Bmj* 1994;308:1077-80 doi: 10.1136/bmj.308.6936.1077.
4. *Japan Advanced Trauma Evaluation and Care (JATEC™) guideline*. 3rd edition ed, 2008.
5. Dunham CM, Barraco RD, Clark DE, et al. Guidelines for emergency tracheal intubation immediately after traumatic injury. *The Journal of trauma* 2003;55:162-79 doi: 10.1097/01.ta.0000083335.93868.2c.
6. Graham CA. Emergency department airway management in the UK. *Journal of the Royal Society of Medicine* 2005;98:107-10 doi: 10.1258/jrsm.98.3.107.
7. Sakles JC, Laurin EG, Rantapaa AA, et al. Airway management in the emergency department: a one-year study of 610 tracheal intubations. *Annals of emergency medicine* 1998;31:325-32 doi: 10.1016/S0196-0644(98)70342-7.
8. Sagarin MJ, Barton ED, Chng YM, et al. Airway management by US and Canadian emergency medicine residents: a multicenter analysis of more than 6,000 endotracheal intubation attempts. *Annals of emergency medicine* 2005;46:328-36 doi: 10.1016/j.annemergmed.2005.01.009.
9. Graham CA, Beard D, Henry JM, et al. Rapid sequence intubation of trauma patients in Scotland. *The Journal of trauma* 2004;56:1123-6 doi:

- 1  
2  
3 10.1097/01.TA.0000109066.62811.8A.  
4  
5  
6 10. Hasegawa K, Hagiwara Y, Chiba T, et al. Emergency airway management in Japan:  
7  
8 Interim analysis of a multi-center prospective observational study. *Resuscitation*  
9  
10 2012;83:428-33 doi: 10.1016/j.resuscitation.2011.11.027.  
11  
12  
13 11. Hasegawa K, Shigemitsu K, Hagiwara Y, et al. Association between repeated intubation  
14  
15 attempts and adverse events in emergency departments: an analysis of a multicenter  
16  
17 prospective observational study. *Annals of emergency medicine* 2012;60:749-54 e2 doi:  
18  
19 10.1016/j.annemergmed.2012.04.005.  
20  
21  
22 12. Imamura T, Brown CA, 3rd, Ofuchi H, et al. Emergency airway management in geriatric  
23  
24 and younger patients: analysis of a multicenter prospective observational study. *The*  
25  
26 *American journal of emergency medicine* 2013;31:190-6 doi:  
27  
28 10.1016/j.ajem.2012.07.008.  
29  
30  
31 13. Hasegawa K, Hagiwara Y, Imamura T, et al. Increased incidence of hypotension in  
32  
33 elderly patients who underwent emergency airway management: an analysis of a  
34  
35 multi-centre prospective observational study. *International journal of emergency*  
36  
37 *medicine* 2013;6:12 doi: 10.1186/1865-1380-6-12.  
38  
39  
40  
41 14. Hospital Intelligence Agency. DPC statistics. <http://hospia.jp/> (accessed 8 Dec 2014)  
42  
43  
44 15. Graham CA, Beard D, Oglesby AJ, et al. Rapid sequence intubation in Scottish urban  
45  
46 emergency departments. *Emergency medicine journal : EMJ* 2003;20:3-5  
47  
48  
49 16. Mayo PH, Hackney JE, Mueck JT, et al. Achieving house staff competence in  
50  
51 emergency airway management: results of a teaching program using a computerized  
52  
53 patient simulator. *Critical care medicine* 2004;32:2422-7  
54  
55  
56 17. Cook DA, Hatala R, Brydges R, et al. Technology-enhanced simulation for health  
57  
58  
59  
60

1  
2  
3 professions education: a systematic review and meta-analysis. JAMA : the journal of the  
4  
5 American Medical Association 2011;306:978-88 doi: 10.1001/jama.2011.1234.  
6  
7

8 18. Bernhard M, Mohr S, Weigand MA, et al. Developing the skill of endotracheal  
9  
10 intubation: implication for emergency medicine. Acta anaesthesiologica Scandinavica  
11  
12 2012;56:164-71 doi: 10.1111/j.1399-6576.2011.02547.x.  
13  
14

15 19. Reed MJ, Dunn MJ, McKeown DW. Can an airway assessment score predict difficulty at  
16  
17 intubation in the emergency department? Emergency medicine journal : EMJ  
18  
19 2005;22:99-102 doi: 10.1136/emj.2003.008771.  
20  
21

22 20. Soyuncu S, Eken C, Cete Y, et al. Determination of difficult intubation in the ED. The  
23  
24 American journal of emergency medicine 2009;27:905-10 doi:  
25  
26 10.1016/j.ajem.2008.07.003.  
27  
28  
29  
30  
31  
32  
33  
34  
35  
36  
37  
38  
39  
40  
41  
42  
43  
44  
45  
46  
47  
48  
49  
50  
51  
52  
53  
54  
55  
56  
57  
58  
59  
60

## Figure Legends

### Figure 1. Flow chart showing inclusion of patients in this study

### Figure 2. Inter-hospital variations in initial methods of intubation

Boxplots of inter-hospital variations in the initial methods of intubation. The line in the middle of the box represents the median, with the lower and upper limits of the box representing the 25th and 75th percentiles, respectively. The whiskers from the box extend to the minimum and maximum values.

### Figure 3. Inter-hospital variations in success rates and adverse event rates

Boxplots of inter-hospital variations in success rates and adverse event rates. The line in the middle of the box represents the median, with the lower and upper limits of the box representing the 25th and 75th percentiles. The whiskers from the box extend to the minimum and maximum values.

1  
2  
3  
4  
5  
6  
7  
8  
9  
10  
11  
12  
13  
14  
15  
16  
17  
18  
19  
20  
21  
22  
23  
24  
25  
26  
27  
28  
29  
30  
31  
32  
33  
34  
35  
36  
37  
38  
39  
40  
41  
42  
43  
44  
45  
46  
47  
48  
49  
50  
51  
52  
53  
54  
55  
56  
57  
58  
59  
60



Flow chart showing inclusion of patients in this study

136x108mm (300 x 300 DPI)



a. Among all trauma patients



b. Among non-cardiac arrest patients

Inter-hospital variations in initial methods of intubation  
 Boxplots of inter-hospital variations in the initial methods of intubation. The line in the middle of the box represents the median, with the lower and upper limits of the box representing the 25th and 75th percentiles, respectively. The whiskers from the box extend to the minimum and maximum values.  
 140x165mm (300 x 300 DPI)

1  
2  
3  
4  
5  
6  
7  
8  
9  
10  
11  
12  
13  
14  
15  
16  
17  
18  
19  
20  
21  
22  
23  
24  
25  
26  
27  
28  
29  
30  
31  
32  
33  
34  
35  
36  
37  
38  
39  
40  
41  
42  
43  
44  
45  
46  
47  
48  
49  
50  
51  
52  
53  
54  
55  
56  
57  
58  
59  
60



a. Among all trauma patients

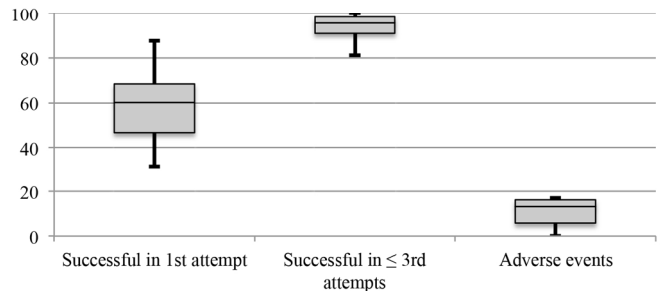

b. Among non-cardiac arrest patients

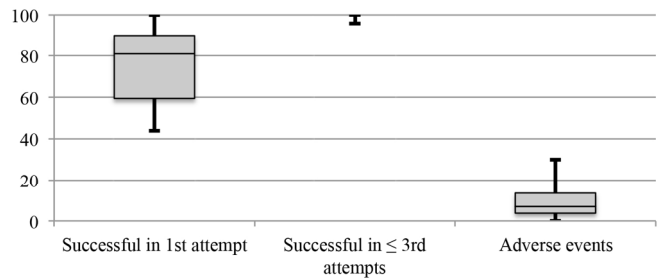

c. Among cardiac arrest patients

Inter-hospital variations in success rates and adverse event rates  
 Boxplots of inter-hospital variations in success rates and adverse event rates. The line in the middle of the box represents the median, with the lower and upper limits of the box representing the 25th and 75th percentiles. The whiskers from the box extend to the minimum and maximum values.  
 137x233mm (300 x 300 DPI)
